# Supplementary material for: Network-Based and Machine-Learning Approaches Identify Diagnostic and Prognostic Models for EMT-Type Gastric Tumors
Source: MDPI journal article supplement (doi:10.3390/genes14030750), 2023-03-19
Supplement: s1 [file s1]

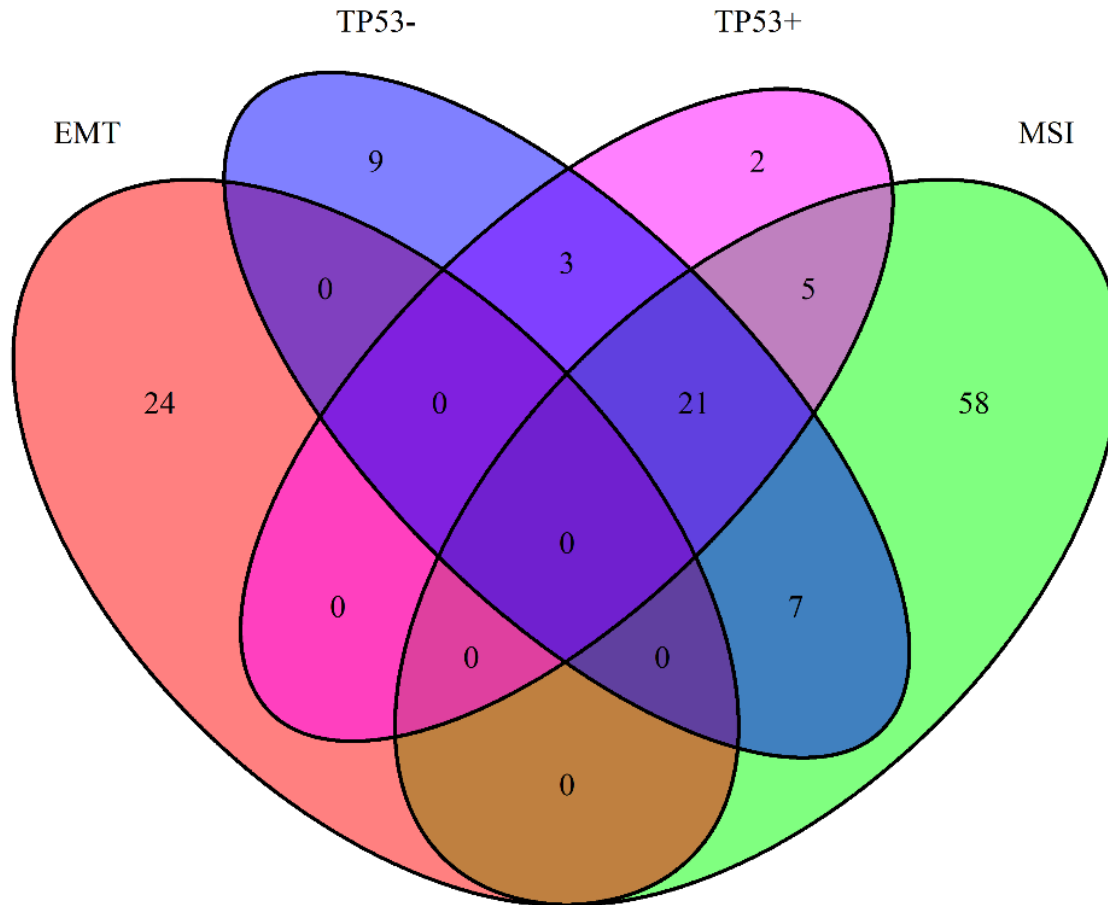

**Supplementary Figure S2 The Venn diagram of the overlap of the members of the top protein-protein interaction modules of different ACRG gastric cancer subtypes.** These modules were identified using the jActiveModules plug-in of the Cytoscape. Notice that while there are considerable overlaps between the members of the top modules of the MSI, TP53+, and TP53- subtypes, the top module of the EMT subtype shares no members with other modules
