# Supplementary material for: Network-Based and Machine-Learning Approaches Identify Diagnostic and Prognostic Models for EMT-Type Gastric Tumors
Source: Genes (Basel). 2023 Mar 19;14(3):750. doi: 10.3390/genes14030750 (PMC10048224; doi:10.3390/genes14030750)
Supplement: Supplementary file 1 [file genes-14-00750-s001.zip]

Archive with 5 entries (5 files):
- Supplementary Figure S2.pdf
- Supplementary Figure S3.pdf
- Supplementary Figure S4-6.pdf
- Supplementary Tables_Revised.xlsx
- Supplementary Figure S1.pdf
