# Supplementary material for: Network-Based and Machine-Learning Approaches Identify Diagnostic and Prognostic Models for EMT-Type Gastric Tumors
Source: Genes (Basel). 2023 Mar 19;14(3):750. doi: 10.3390/genes14030750 (PMC10048224; doi:10.3390/genes14030750)
Supplement: Supplementary file 1 [file genes-14-00750-s001.zip › Supplementary Tables_Revised.xlsx]

## Sheet: Supplementary Table S1
Clinical information of TCGA, ACRG, and Singapore cohorts
TCGA cohort						ACRG cohort							Singapore cohort
Sample ID	Age	Sex	AJCC pathologic stage	Primary location	ACRG subtype	Sample ID	Age	Sex	AJCC pathologic stage	Primary location	Lauren classification	ACRG subtype	Sample ID	Age	Sex	AJCC pathologic stage	Lauren classification	ACRG subtype
TCGA-B7-5818	62.4	Male	I	Body of stomach	TP53-	1	78	Male	III	antrum	Intestinal	MSI	GC-050-IY-T	72	Female	III	Diffuse	EMT
TCGA-HU-A4HD	73.1	Male	III	Gastric antrum	TP53-	3	61	Male	III	antrum	Diffuse	TP53+	GC-2000178T	71.3	Female	II	Intestinal	EMT
TCGA-CG-4304	85	Male	I	Cardia, NOS	TP53+	4	46	Female	III	cardia	Diffuse	EMT	GC-2000238T	74.4	Female	II	Diffuse	EMT
TCGA-BR-8592	63.4	Female	III	Fundus of stomach	EMT	9	40	Female	III	cardia	Diffuse	EMT	GC-2000242T	67.4	Female	I	Intestinal	EMT
TCGA-VQ-A928	49.5	Male	IV	Body of stomach	NA	11	67	Female	III	antrum	Intestinal	MSI	GC-2000346T	31.8	Female	III	Diffuse	EMT
TCGA-VQ-A8E2	57.8	Male	III	Body of stomach	NA	12	70	Male	IV	body	Intestinal	TP53-	GC-2000518T	55.9	Male	I	Diffuse	EMT
TCGA-BR-A4J6	69.3	Female	II	Cardia, NOS	NA	14	66	Male	IV	cardia	Diffuse	TP53+	GC-2001159T	78.4	Male	I	Intestinal	EMT
TCGA-HU-A4H4	53.9	Female	II	Gastric antrum	TP53+	16	54	Male	IV	antrum	Intestinal	TP53-	GC-2001241T	75.9	Female	II	Diffuse	EMT
TCGA-VQ-A91N	59.6	Female	IV	Gastric antrum	NA	17	52	Male	IV	antrum	Diffuse	EMT	GC-20020838T	79.4	Male	I	Intestinal	EMT
TCGA-RD-A8N0	53.4	Female	III	Fundus of stomach	NA	18	62	Male	III	antrum	Diffuse	TP53-	GC-29806547T	66.2	Female	I	Diffuse	EMT
TCGA-D7-A6F0	79.2	Female	I	Cardia, NOS	NA	19	67	Female	IV	cardia	Diffuse	TP53+	GC-970017T	57.5	Female	II	Diffuse	EMT
TCGA-B7-A5TN	60.2	Male	II	Fundus of stomach	NA	20	72	Male	III	antrum	Diffuse	TP53+	GC-980011T	74.1	Male	IV	Intestinal	TP53-
TCGA-BR-8286	49.2	Male	II	Gastric antrum	MSI	21	46	Male	IV	body	Intestinal	TP53-	GC-980251T	52.7	Female	I	Diffuse	EMT
TCGA-BR-8380	55.2	Male	III	Gastric antrum	EMT	22	63	Male	III	antrum	Intestinal	TP53-	GC-980269T	68.8	Male	IV	Diffuse	EMT
TCGA-IN-A6RI	46	Male	I	Cardia, NOS	NA	23	59	Male	III	antrum	Intestinal	TP53-	GC-980401T	82.9	Female	III	Diffuse	EMT
TCGA-VQ-A8PP	76.1	Male	IV	Body of stomach	NA	24	64	Male	III	cardia	Mixed	MSI	GC-980417T	67	Male	IV	Diffuse	EMT
TCGA-VQ-A8P5	67.3	Male	II	Body of stomach	NA	25	60	Female	III	antrum	Intestinal	TP53-	GC-024-SWM-T	40	Male	IV	Intestinal	TP53+
TCGA-D7-6526	67.1	Female	III	Body of stomach	TP53+	26	58	Male	IV	body	Diffuse	TP53-	GC-046CBP-T	78	Male	I	Mixed	TP53+
TCGA-D7-6525	58.1	Male	III	Cardia, NOS	TP53+	28	39	Male	IV	antrum	Diffuse	MSI	GC-051-TGC-T	76	Female	I	Intestinal	TP53+
TCGA-FP-7916	78	Male	III	Gastric antrum	TP53+	29	73	Female	III	body	Diffuse	EMT	GC-058-CPS-T	65	Male	II	Intestinal	TP53+
TCGA-HU-A4H8	77.5	Male	I	Gastric antrum	MSI	30	64	Male	III	antrum	Diffuse	TP53-	GC-15295992T	67.7	Male	II	Intestinal	TP53-
TCGA-VQ-A91K	69.7	Male	III	Gastric antrum	NA	31	24	Male	IV	body	Diffuse	TP53+	GC-2000068T	64.3	Female	I	Intestinal	TP53-
TCGA-CD-5800	NA	Female	II	Gastric antrum	TP53-	32	67	Male	III	antrum	Intestinal	TP53-	GC-2000114T	52.7	Male	IV	Intestinal	TP53-
TCGA-MX-A666	61.1	Male	II	Stomach, NOS	NA	33	64	Male	III	antrum	Mixed	TP53+	GC-2000286T	65.3	Male	II	Intestinal	EMT
TCGA-BR-6458	57.7	Female	II	Body of stomach	EMT	34	70	Male	IV	body	Diffuse	TP53-	GC-2001120T	66.8	Male	IV	Intestinal	TP53+
TCGA-VQ-A91Q	61.1	Male	IV	Cardia, NOS	NA	35	51	Male	III	body	Intestinal	TP53+	GC-20020448T	64	Male	III	Diffuse	TP53-
TCGA-CD-A487	51.2	Male	II	Gastric antrum	NA	36	56	Female	III	body	Diffuse	TP53+	GC-38877042T	65.1	Male	III	Diffuse	TP53-
TCGA-KB-A93J	78.4	Male	II	Cardia, NOS	NA	38	65	Female	IV	body	Diffuse	TP53-	GC-48982424T	53.2	Female	I	Diffuse	TP53-
TCGA-BR-8289	57.1	Male	IV	Body of stomach	EMT	39	77	Female	IV	antrum	Intestinal	TP53-	GC-66811693T	68.4	Male	I	Intestinal	TP53-
TCGA-BR-4366	87.7	Male	NA	Gastric antrum	NA	41	71	Male	III	antrum	Diffuse	MSI	GC-82973565T	69.5	Male	III	Mixed	TP53+
TCGA-CD-A489	59	Male	II	Gastric antrum	NA	42	52	Female	III	body	Diffuse	EMT	GC-980002T	58.1	Female	I	Diffuse	TP53+
TCGA-CD-5803	78.4	Female	II	Gastric antrum	NA	45	61	Male	III	body	Diffuse	TP53-	GC-980369T	46.7	Female	I	Diffuse	TP53-
TCGA-BR-A4J8	71.4	Female	III	Cardia, NOS	NA	47	72	Male	III	body	Intestinal	TP53+	GC-980418T	88	Male	III	Intestinal	TP53-
TCGA-ZA-A8F6	71.6	Male	I	Gastric antrum	NA	49	50	Female	IV	body	Diffuse	EMT	GC-990195T	31.2	Male	IV	Intestinal	EMT
TCGA-CD-8531	67	Female	III	Fundus of stomach	NA	50	55	Male	IV	antrum	Intestinal	TP53+	GC-990205T	72.3	Female	II	Intestinal	TP53-
TCGA-VQ-A8E7	59.4	Male	IV	Cardia, NOS	NA	51	70	Female	IV	antrum	Intestinal	MSI	GC-990413T	67.7	Male	II	Diffuse	TP53-
TCGA-CG-4437	83.5	Male	II	Cardia, NOS	TP53+	52	67	Female	IV	body	Intestinal	TP53+	GC-052-GC-T	76	Male	III	Diffuse	TP53+
TCGA-BR-4253	80.5	Female	III	Body of stomach	NA	53	65	Male	III	body	Intestinal	TP53+	GC-066-OSL-T	82	Female	III	Diffuse	TP53-
TCGA-VQ-A8PF	77	Male	III	Body of stomach	NA	54	64	Female	IV	body	Mixed	EMT	GC-068JW-T	72	Male	III	Intestinal	TP53+
TCGA-BR-A44T	53.2	Female	II	Cardia, NOS	EMT	55	70	Male	III	body	Intestinal	TP53-	GC-069-LYK-T	74	Male	I	Intestinal	MSI
TCGA-BR-6852	64.3	Female	II	Cardia, NOS	MSI	56	72	Male	III	antrum	Intestinal	TP53-	GC-2000085T	52.6	Male	II	Intestinal	TP53+
TCGA-D7-8573	57.4	Male	II	Fundus of stomach	TP53+	57	74	Male	IV	entire	Diffuse	TP53+	GC-2000169T	78.3	Male	III	Intestinal	TP53+
TCGA-RD-A8N6	79	Female	III	Gastric antrum	NA	58	72	Male	III	antrum	Diffuse	EMT	GC-2000256T	61.4	Female	III	Mixed	MSI
TCGA-D7-A6EX	72.7	Female	III	Gastric antrum	NA	60	55	Female	IV	antrum	Diffuse	TP53-	GC-2000484T	67.7	Male	III	Intestinal	TP53+
TCGA-VQ-A8DT	43.7	Male	III	Body of stomach	NA	61	56	Male	IV	body	Intestinal	MSI	GC-2000877T	44.6	Male	II	Intestinal	EMT
TCGA-BR-7707	69.4	Female	I	Body of stomach	MSI	62	62	Female	III	cardia	Diffuse	TP53-	GC-2000892T	71.3	Female	II	Intestinal	TP53-
TCGA-CG-5717	58.8	Male	II	Cardia, NOS	TP53+	63	60	Male	IV	body	Diffuse	TP53+	GC-20020361T	62.8	Male	I	Intestinal	TP53-
TCGA-IN-AB1V	63.1	Male	I	Cardia, NOS	NA	64	80	Male	IV	antrum	Intestinal	TP53-	GC-43618211T	69.4	Female	II	Mixed	TP53+
TCGA-BR-8366	80.5	Female	II	Fundus of stomach	TP53+	68	33	Male	II	body	Intestinal	TP53+	GC-57689477T	84.5	Female	I	Intestinal	MSI
TCGA-BR-6705	68.7	Female	III	Body of stomach	EMT	75	59	Female	II	antrum	Diffuse	TP53-	GC-57701999T	87.9	Male	III	Intestinal	TP53-
TCGA-D7-A6EY	72.7	Female	III	Gastric antrum	NA	77	74	Male	II	antrum	Diffuse	TP53+	GC-68334421T	64.1	Male	I	Intestinal	TP53+
TCGA-IN-8663	69	Male	II	Cardia, NOS	TP53+	78	67	Male	II	antrum	Intestinal	MSI	GC-970003T	38.1	Female	III	Diffuse	TP53+
TCGA-R5-A7ZI	44.9	Female	IV	Stomach, NOS	NA	79	62	Male	II	body	Intestinal	TP53+	GC-980001T	58.9	Male	IV	Intestinal	TP53+
TCGA-VQ-A91S	63.5	Male	III	Body of stomach	NA	80	66	Male	II	antrum	Intestinal	TP53+	GC-980025T	80.2	Male	IV	Intestinal	TP53+
TCGA-HU-A4G2	46	Male	II	Gastric antrum	TP53+	81	51	Female	II	antrum	Diffuse	TP53-	GC-980028T	60.9	Male	I	Intestinal	MSI
TCGA-CG-4469	70.1	Male	IV	Stomach, NOS	MSI	82	71	Female	II	body	Intestinal	MSI	GC-980045T	70.2	Male	III	Intestinal	TP53-
TCGA-CD-5799	45.3	Male	II	Gastric antrum	TP53-	83	74	Male	II	antrum	Diffuse	TP53-	GC-980063T	49.2	Female	IV	Diffuse	TP53+
TCGA-CG-4477	58.7	Female	I	Cardia, NOS	MSI	84	61	Male	II	body	Intestinal	TP53+	GC-980097T	65.4	Male	II	Mixed	MSI
TCGA-RD-A8N4	58.4	Female	III	Gastric antrum	NA	85	72	Male	II	antrum	Intestinal	MSI	GC-980436T	65	Female	III	Intestinal	TP53-
TCGA-R5-A805	71.6	Male	III	Cardia, NOS	NA	86	54	Male	II	antrum	Intestinal	TP53+	GC-98748381T	66.4	Male	III	Mixed	TP53+
TCGA-VQ-A91V	58.9	Male	III	Cardia, NOS	NA	87	63	Male	II	antrum	Intestinal	MSI	GC-990024T	68.1	Male	III	Intestinal	MSI
TCGA-HU-A4GH	75.3	Male	I	Body of stomach	MSI	88	71	Male	II	body	Intestinal	TP53-	GC-990069T	69.2	Male	I	Diffuse	TP53+
TCGA-BR-8365	70.5	Female	II	Fundus of stomach	EMT	89	58	Male	II	body	Intestinal	TP53+	GC-990097T	46.2	Male	III	Intestinal	TP53+
TCGA-HU-8244	77.2	Female	I	Body of stomach	NA	90	80	Male	IV	antrum	Intestinal	EMT	GC-990111T	74.3	Female	I	Intestinal	MSI
TCGA-VQ-A8PE	78.8	Male	III	Cardia, NOS	NA	91	56	Female	II	cardia	Intestinal	EMT	GC-990136T	76.3	Male	I	Intestinal	EMT
TCGA-VQ-A92D	67.4	Male	I	Cardia, NOS	NA	93	58	Male	II	antrum	Diffuse	EMT	GC-990203T	79.5	Male	III	Intestinal	TP53-
TCGA-VQ-A8E0	68.1	Male	III	Body of stomach	NA	94	60	Male	III	antrum to body	Intestinal	TP53+	GC-990275T	71.6	Male	II	Intestinal	TP53-
TCGA-VQ-AA6J	75.4	Male	III	Cardia, NOS	NA	95	43	Female	IV	antrum to body	Diffuse	TP53-	GC-990474T	78.7	Female	III	Intestinal	MSI
TCGA-CG-5725	72.1	Male	I	Cardia, NOS	NA	96	56	Male	II	body	Intestinal	TP53+	GC-990475T	70.9	Male	II	Intestinal	TP53-
TCGA-F1-6177	90.1	Male	I	Gastric antrum	MSI	97	77	Male	II	antrum	Intestinal	MSI	GC-990489T	79.4	Male	I	Mixed	TP53-
TCGA-BR-8588	55.3	Female	II	Fundus of stomach	TP53+	101	64	Male	IV	body	Intestinal	TP53+	GC-028LGL-T	56	Male	IV	Intestinal	EMT
TCGA-BR-6709	57.4	Female	III	Cardia, NOS	NA	105	44	Male	II	body	Intestinal	TP53-	GC-10390127T	27.6	Female	IV	Diffuse	EMT
TCGA-HU-A4G9	67.8	Female	I	Body of stomach	MSI	106	42	Male	II	antrum	Diffuse	MSI	GC-2000040T	70.1	Male	IV	Diffuse	EMT
TCGA-CG-4438	56.4	Male	IV	Gastric antrum	TP53-	107	67	Male	II	body	Intestinal	MSI	GC-2000696T	80	Female	I	Intestinal	EMT
TCGA-HU-A4G3	55	Male	II	Gastric antrum	TP53+	108	68	Female	II	body	Intestinal	MSI	GC-2000732T	59.9	Female	IV	Diffuse	EMT
TCGA-D7-5578	80.5	Male	III	Body of stomach	TP53-	109	42	Female	II	antrum	Diffuse	TP53+	GC-2000963T	49.9	Male	III	Diffuse	EMT
TCGA-BR-8369	76.9	Female	III	Gastric antrum	TP53-	112	65	Male	II	body	Intestinal	TP53-	GC-2001135T	64.1	Male	IV	Diffuse	EMT
TCGA-R5-A7ZR	70.7	Female	III	Body of stomach	NA	113	59	Male	II		Diffuse	TP53+	GC-31231321T	71.6	Male	IV	Diffuse	EMT
TCGA-VQ-AA6D	52.3	Female	III	Gastric antrum	NA	114	52	Male	II	body	Diffuse	TP53-	GC-78373410T	51.2	Female	IV	Diffuse	EMT
TCGA-HU-A4GX	71	Female	III	Gastric antrum	MSI	115	59	Female	II	antrum	Diffuse	TP53-	GC-91515473T	43.2	Male	IV	Mixed	EMT
TCGA-IN-A6RS	76.2	Male	I	Cardia, NOS	NA	116	69	Male	?II/ ?I/ ?I	cardia	Intestinal	TP53+	GC-73291145T	47.7	Female	II	Intestinal	TP53-
TCGA-BR-4363	60.8	Female	NA	Body of stomach	NA	117	46	Male	II	body	Diffuse	TP53+	GC-980307T	23.4	Male	IV	Intestinal	TP53-
TCGA-BR-8372	64	Male	III	Fundus of stomach	MSI	118	69	Male	II	cardia	Intestinal	TP53-	GC-980344T	69.8	Female	IV	Diffuse	TP53-
TCGA-D7-A4YX	63.7	Male	II	Fundus of stomach	TP53+	121	51	Male	II	antrum	Intestinal	TP53-	GC-990355T	34.3	Female	IV	Diffuse	TP53-
TCGA-BR-4369	75.4	Male	NA	Cardia, NOS	NA	124	61	Female	II	antrum	Diffuse	TP53+	GC-2000175T	64.3	Male	IV	Intestinal	EMT
TCGA-D7-6520	53.3	Male	III	Gastric antrum	TP53+	128	66	Female	II	antrum	Intestinal	TP53-	GC-2000617T	76.9	Male	IV	Intestinal	TP53-
TCGA-D7-A74A	61.5	Female	III	Cardia, NOS	NA	129	74	Male	II	antrum	Diffuse	MSI	GC-2000676T	85	Female	III	Intestinal	MSI
TCGA-CG-5734	68.7	Male	III	Body of stomach	TP53+	132	64	Male	II	antrum	Diffuse	EMT	GC-2001206T	64.8	Male	IV	Diffuse	EMT
TCGA-BR-A4PF	72.4	Male	III	Gastric antrum	MSI	133	70	Male	II	antrum	Diffuse	TP53+	GC-970010T	72.9	Male	III	Intestinal	TP53-
TCGA-RD-A8MV	56.9	Male	III	Body of stomach	NA	134	81	Male	II	antrum	Intestinal	TP53+	GC-980252T	66.5	Male	IV	Intestinal	TP53-
TCGA-VQ-A8P8	72.4	Female	II	Body of stomach	NA	135	53	Female	IV	body	Diffuse	EMT	GC-990071T	71.2	Female	IV	Intestinal	EMT
TCGA-D7-6522	58.8	Male	I	Gastric antrum	EMT	136	28	Female	IV	body	Diffuse	EMT	GC-990098T	53.9	Female	IV	Intestinal	TP53+
TCGA-IN-A6RO	70.7	Male	I	Cardia, NOS	NA	137	69	Male	IV	antrum	Intestinal	TP53-	GC-017TPC-T	76	Male	IV	Mixed	EMT
TCGA-FP-7998	77.5	Male	III	Body of stomach	EMT	138	70	Male	IV	body	Diffuse	TP53-	GC-031KCW-T	29	Male	III	Diffuse	EMT
TCGA-VQ-A91E	67.3	Female	III	Gastric antrum	NA	139	70	Male	?III/ ?II	antrum	Intestinal	TP53-	GC-2000403T	67.6	Male	II	Diffuse	EMT
TCGA-HU-8602	59	Female	II	Gastric antrum	MSI	140	72	Female	IV	cardia	Diffuse	TP53-	GC-2000441T	52.8	Male	III	Diffuse	EMT
TCGA-FP-8211	62.9	Male	II	Cardia, NOS	MSI	141	71	Male	III	antrum	Diffuse	TP53+	GC-2000472T	81.7	Male	III	Diffuse	EMT
TCGA-BR-8297	58.1	Male	III	Body of stomach	EMT	142	53	Male	IV	entire	Diffuse	EMT	GC-2000479T	62.4	Male	III	Intestinal	EMT
TCGA-BR-4357	58.3	Male	NA	Body of stomach	NA	143	50	Male	III	antrum	Intestinal	TP53+	GC-2000521T	66.8	Female	IV	Diffuse	EMT
TCGA-CG-4466	81.5	Female	I	Cardia, NOS	MSI	144	74	Female	II	antrum	Intestinal	MSI	GC-2000752T	61.5	Male	IV	Diffuse	EMT
TCGA-CD-8533	48.8	Male	II	Gastric antrum	NA	145	52	Male	IV	body	Diffuse	EMT	GC-2000778T	61.7	Male	IV	Mixed	EMT
TCGA-IN-A6RL	84.3	Male	NA	Cardia, NOS	NA	146	51	Female	IV	body	Diffuse	EMT	GC-2000859T	65.2	Male	IV	Intestinal	EMT
TCGA-KB-A6F7	54.2	Female	I	Body of stomach	NA	148	57	Male	IV	antrum	Intestinal	TP53-	GC-2001226T	75.6	Male	III	Diffuse	EMT
TCGA-BR-7717	63.3	Male	IV	Cardia, NOS	TP53-	150	54	Female	II	antrum	Diffuse	MSI	GC-20020011T	49.2	Male	III	Mixed	EMT
TCGA-HU-A4G8	71.9	Female	II	Gastric antrum	MSI	151	70	Male	III	antrum	Diffuse	TP53-	GC-20020032T	56.3	Male	IV	Intestinal	TP53+
TCGA-VQ-A91U	78.9	Male	III	Cardia, NOS	NA	152	62	Male	II	antrum	Diffuse	TP53-	GC-20020846T	45.6	Male	II	Diffuse	EMT
TCGA-HU-A4GP	62.2	Female	II	Gastric antrum	TP53+	154	49	Male	III	body	Mixed	TP53+	GC-6412929T	68.4	Female	II	Mixed	EMT
TCGA-BR-8371	62.7	Male	III	Cardia, NOS	EMT	155	76	Male	II	body	Mixed	TP53-	GC-65256293T	65	Female	III	Diffuse	EMT
TCGA-RD-A7BW	68.6	Female	I	Fundus of stomach	NA	156	37	Female	II	body	Intestinal	TP53+	GC-87622942T	56.5	Male	IV	Diffuse	EMT
TCGA-BR-8382	67.8	Female	III	Gastric antrum	MSI	157	56	Male	II	body	Diffuse	TP53+	GC-980056T	33.4	Female	II	Diffuse	EMT
TCGA-BR-8284	72.7	Female	III	Gastric antrum	EMT	160	69	Male	II	antrum	Diffuse	MSI	GC-980148T	66.4	Male	IV	Diffuse	EMT
TCGA-FP-8210	48.1	Male	III	Gastric antrum	EMT	164	68	Male	III	antrum	Diffuse	TP53-	GC-980319T	67.8	Male	III	Mixed	EMT
TCGA-HU-8238	56.7	Male	NA	Gastric antrum	NA	165	56	Male	II	antrum	Mixed	TP53-	GC-980453T	65	Male	IV	Intestinal	EMT
TCGA-VQ-A8PD	69.2	Male	III	Body of stomach	NA	168	60	Male	III	antrum	Mixed	TP53+	GC-990005T	59.6	Male	III	Diffuse	EMT
TCGA-VQ-A8PJ	53.1	Male	IV	Body of stomach	NA	169	68	Female	III	antrum	Diffuse	TP53+	GC-990073T	59.2	Male	III	Intestinal	EMT
TCGA-B7-A5TI	52.1	Male	III	Fundus of stomach	NA	171	70	Female	II	body	Intestinal	TP53-	GC-990339T	58.5	Female	II	Diffuse	EMT
TCGA-BR-4279	44	Male	II	Stomach, NOS	EMT	172	63	Male	II	antrum	Intestinal	MSI	GC-990396T	64.8	Male	III	Diffuse	EMT
TCGA-BR-6803	54.1	Female	II	Body of stomach	EMT	173	48	Male	III	body	Diffuse	EMT	GC-032TKK-T	67	Male	III	Intestinal	TP53+
TCGA-RD-A8N9	63.2	Female	II	Cardia, NOS	NA	175	69	Female	II	antrum	Intestinal	TP53-	GC-047LAK-T	88	Female	IV	Intestinal	TP53-
TCGA-D7-A6F2	62.5	Male	I	Fundus of stomach	NA	177	61	Male	II	body	Intestinal	MSI	GC-2000088T	53.1	Male	IV	Diffuse	EMT
TCGA-HU-A4HB	68.9	Male	II	Gastric antrum	NA	180	35	Male	IV	body	Diffuse	TP53-	GC-2000708T	58.2	Male	III	Intestinal	EMT
TCGA-BR-A4IV	48	Male	III	Gastric antrum	EMT	182	52	Male	III	cardia	Diffuse	TP53+	GC-2001190T	67.5	Female	III	Diffuse	TP53-
TCGA-EQ-8122	72	Female	II	Gastric antrum	TP53-	185	44	Female	IV	entire	Diffuse	EMT	GC-26109694T	64.4	Male	I	Diffuse	TP53+
TCGA-MX-A5UG	78.7	Male	III	Gastric antrum	NA	186	69	Male	III	antrum	Diffuse	TP53-	GC-31661621T	84	Female	III	Intestinal	TP53-
TCGA-BR-4187	56.5	Male	NA	Gastric antrum	EMT	187	77	Female	II	antrum	Mixed	TP53-	GC-32226415T	76.4	Male	II	Intestinal	TP53-
TCGA-BR-6452	79	Female	II	Body of stomach	MSI	188	45	Female	III	cardia	Diffuse	EMT	GC-37262942T	87.7	Female	II	Diffuse	TP53+
TCGA-BR-4367	79	Male	NA	Gastric antrum	NA	189	70	Male	IV	antrum	Mixed	TP53-	GC-5218170T	66.8	Female	III	Diffuse	EMT
TCGA-D7-A4YU	73.4	Male	III	Fundus of stomach	TP53-	190	61	Male	II	body	Intestinal	TP53-	GC-970024T	80.8	Male	I	Intestinal	TP53-
TCGA-VQ-A924	69.5	Male	II	Gastric antrum	NA	192	67	Male	III	antrum	Diffuse	EMT	GC-980442T	61.6	Female	II	Diffuse	EMT
TCGA-BR-8060	75.5	Female	II	Cardia, NOS	NA	193	69	Male	III	antrum	Mixed	TP53-	GC-990060T	25.2	Female	III	Diffuse	TP53-
TCGA-CG-4476	69.9	Male	III	Body of stomach	NA	197	63	Male	II	antrum	Diffuse	TP53-	GC-990068T	73.3	Male	III	Diffuse	TP53-
TCGA-BR-4370	74.9	Female	NA	Gastric antrum	NA	201	77	Female	III	cardia	Diffuse	TP53+	GC-990089T	74.8	Male	IV	Intestinal	EMT
TCGA-VQ-AA6A	56.9	Male	III	Cardia, NOS	NA	202	51	Male	II	antrum	Diffuse	EMT	GC-990129T	77.3	Female	III	Intestinal	TP53-
TCGA-VQ-A8PX	51.8	Male	I	Stomach, NOS	NA	204	56	Male	IV	antrum	Diffuse	EMT	GC-025-PHW-T	73	Male	IV	Intestinal	TP53-
TCGA-D7-8575	75.9	Male	III	Fundus of stomach	TP53+	205	61	Male	III	cardia	Diffuse	MSI	GC-064-SSB-T	73	Male	IV	Intestinal	TP53-
TCGA-BR-6564	46.9	Female	III	Body of stomach	EMT	206	57	Male	II	antrum	Diffuse	EMT	GC-068-QKW-T	70	Male	IV	Intestinal	MSI
TCGA-R5-A7O7	52	Male	IV	Cardia, NOS	NA	207	62	Male	III	antrum	Diffuse	EMT	GC-2000291T	67.9	Male	III	Diffuse	EMT
TCGA-FP-8099	79.8	Male	II	Cardia, NOS	TP53-	209	70	Male	III	cardia	Intestinal	TP53+	GC-2000303T	47.6	Male	IV	Diffuse	TP53+
TCGA-VQ-A91D	70.4	Male	III	Body of stomach	NA	212	30	Female	III	body	Diffuse	TP53-	GC-2000362T	50.6	Male	III	Intestinal	EMT
TCGA-BR-8384	69.3	Male	III	Gastric antrum	EMT	213	65	Male	III	antrum	Diffuse	EMT	GC-2000433T	55.7	Female	III	Diffuse	EMT
TCGA-CG-4462	72.6	Female	IV	Stomach, NOS	NA	225	40	Male	III	body	Diffuse	EMT	GC-2000920T	80.4	Male	III	Intestinal	EMT
TCGA-VQ-A8PB	65.6	Female	II	Gastric antrum	NA	226	63	Female	II	antrum	Intestinal	TP53-	GC-2001123T	56.1	Male	III	Intestinal	TP53+
TCGA-BR-7901	74.1	Male	II	Cardia, NOS	TP53+	227	70	Female	IV	antrum	Diffuse	TP53+	GC-2001229T	48.9	Female	II	Diffuse	TP53+
TCGA-D7-A6EV	71.9	Female	II	Gastric antrum	NA	228	69	Male	III	antrum	Intestinal	TP53-	GC-49375233T	79.5	Female	IV	Intestinal	EMT
TCGA-CG-5720	71.7	Male	I	Cardia, NOS	NA	235	52	Female	III	body	Diffuse	TP53-	GC-58947266T	80.3	Male	III	Intestinal	TP53-
TCGA-IN-8462	80.1	Male	II	Cardia, NOS	TP53+	236	82	Male	III	cardia	Mixed	TP53-	GC-76629543T	92.4	Male	III	Intestinal	TP53+
TCGA-HF-7134	NA	Male	I	Body of stomach	NA	237	75	Female	II	antrum	Diffuse	TP53+	GC-77263387T	75.4	Male	II	Mixed	TP53+
TCGA-D7-6527	62.4	Male	II	Cardia, NOS	TP53-	238	72	Female	IV	antrum	Diffuse	TP53-	GC-83507354T	62.3	Male	III	Intestinal	TP53-
TCGA-HU-A4GJ	60.5	Female	III	Gastric antrum	NA	240	66	Male	II	body	Intestinal	TP53-	GC-91228050T	73.7	Male	IV	Mixed	TP53-
TCGA-CD-8526	73.5	Female	III	Fundus of stomach	NA	241	69	Female	III	antrum	Diffuse	MSI	GC-970005T	68.9	Male	IV	Intestinal	TP53-
TCGA-BR-6457	69.6	Male	II	Body of stomach	EMT	244	52	Male	III	body	Intestinal	TP53-	GC-980021T	59.1	Male	III	Intestinal	TP53-
TCGA-BR-6565	67.1	Male	II	Body of stomach	TP53-	246	58	Male	II	body	Intestinal	TP53-	GC-980095T	48.6	Female	IV	Diffuse	EMT
TCGA-MX-A5UJ	86.3	Female	III	Gastric antrum	NA	253	71	Female	IV	antrum	Diffuse	TP53-	GC-980211T	63.6	Male	III	Intestinal	TP53+
TCGA-D7-6822	77.3	Male	I	Body of stomach	TP53-	255	63	Male	II	body	Intestinal	MSI	GC-980390T	77.9	Female	I	Intestinal	TP53-
TCGA-BR-8381	51.6	Male	II	Fundus of stomach	NA	256	62	Female	IV	antrum	Diffuse	EMT	GC-990041T	40.3	Male	IV	Intestinal	MSI
TCGA-D7-A6EZ	66.9	Male	III	Fundus of stomach	NA	263	58	Female	IV	antrum	Diffuse	EMT	GC-990046T	55.5	Male	III	Diffuse	TP53+
TCGA-VQ-A8PU	72.9	Female	III	Body of stomach	NA	268	75	Female	IV	body	Diffuse	EMT	GC-990172T	60.4	Male	III	Intestinal	TP53-
TCGA-HU-A4H0	72.1	Male	III	Body of stomach	MSI	269	56	Male	III	antrum	Intestinal	EMT	GC-990300T	50.5	Female	III	Intestinal	TP53-
TCGA-VQ-A94T	73.2	Male	III	Cardia, NOS	NA	270	77	Female	II	antrum	Diffuse	MSI	GC-990412T	64.6	Male	III	Intestinal	TP53-
TCGA-VQ-AA69	35.9	Male	III	Cardia, NOS	NA	275	48	Male	II	antrum	Diffuse	MSI	GC-990515T	59.7	Male	IV	Intestinal	TP53-
TCGA-CG-5722	67	Female	IV	Body of stomach	NA	282	71	Male	IV	antrum	Intestinal	TP53-	GC-990221T	72	Male	III	Intestinal	TP53-
TCGA-BR-4371	72	Female	NA	Body of stomach	NA	287	41	Female	III	body	Diffuse	EMT	GC-042-KS-T	69	Male	III	Mixed	TP53-
TCGA-HU-A4GU	74	Male	II	Gastric antrum	TP53-	288	48	Female	IV	cardia	Diffuse	TP53-	GC-043-WKS-T	49	Female	I	Intestinal	TP53+
TCGA-VQ-AA6G	68.7	Male	II	Cardia, NOS	NA	299	60	Female	III	cardia	Diffuse	TP53-	GC-067-LCW-T	73	Male	I	Mixed	TP53-
TCGA-BR-8486	90.1	Female	I	Fundus of stomach	TP53+	301	63	Female	II	antrum	Intestinal	TP53-	GC-2000159T	53	Female	I	Intestinal	TP53-
TCGA-CG-4436	57.4	Male	I	Stomach, NOS	TP53-	311	63	Male	II	body	Intestinal	TP53-	GC-2000201T	69.9	Male	I	Intestinal	TP53-
TCGA-HU-8610	75.6	Male	I	Body of stomach	TP53+	318	66	Female	IV	antrum	Intestinal	TP53-	GC-20020999T	72.5	Female	III	Diffuse	EMT
TCGA-HU-A4GQ	71.8	Male	III	Gastric antrum	NA	319	61	Male	IV	antrum	Intestinal	TP53-	GC-20263644T	63.3	Female	II	Diffuse	EMT
TCGA-D7-8574	72.8	Male	III	Gastric antrum	EMT	321	60	Male	IV	antrum	Intestinal	TP53-	GC-46404174T	47.4	Female	I	Diffuse	EMT
TCGA-IN-A6RR	84.2	Male	NA	Cardia, NOS	NA	322	56	Female	III	body	Diffuse	TP53-	GC-47492137T	62.8	Male	III	Diffuse	TP53-
TCGA-BR-7715	65.4	Male	II	Body of stomach	EMT	323	77	Female	III	antrum	Diffuse	MSI	GC-61669256T	56.9	Male	IV	Diffuse	TP53-
TCGA-VQ-A91X	74.8	Male	III	Gastric antrum	NA	324	84	Female	IV	antrum	Intestinal	MSI	GC-7847924T	64.3	Female	III	Diffuse	EMT
TCGA-VQ-A91Y	67.9	Male	III	Gastric antrum	NA	325	37	Female	IV	antrum	Intestinal	TP53-	GC-980048T	45.7	Female	IV	Diffuse	TP53-
TCGA-CG-4440	69	Female	IV	Body of stomach	EMT	326	63	Male	IV	antrum	Intestinal	TP53+	GC-980305T	39	Female	III	Diffuse	TP53+
TCGA-BR-8081	71.5	Female	II	Body of stomach	EMT	327	55	Female	III	body	Diffuse	TP53+	GC-990010T	69.6	Male	IV	Intestinal	TP53-
TCGA-BR-6710	42	Male	I	Cardia, NOS	TP53-	328	44	Female	III	body	Diffuse	TP53-	GC-990119T	56.4	Male	III	Diffuse	EMT
TCGA-VQ-A94R	63.7	Male	NA	Gastric antrum	NA	329	60	Female	II	antrum	Intestinal	MSI	GC-980488T	66	Male	III	Intestinal	TP53-
TCGA-R5-A7ZF	65.5	Female	IV	Gastric antrum	NA	330	44	Female	IV	whole	Diffuse	TP53+	GC-20020455T	81	Female	IV	Intestinal	EMT
TCGA-CD-A4MH	86.8	Female	II	Gastric antrum	NA	331	57	Female	IV	body	Intestinal	TP53+	GC-980386T	75.9	Female	III	Diffuse	EMT
TCGA-HU-A4H3	57	Female	III	Body of stomach	MSI	333	42	Female	IV	body	Diffuse	EMT	GC-2000529T	76.8	Male	IV	Intestinal	EMT
TCGA-BR-8678	76.8	Male	I	Fundus of stomach	MSI	336	69	Male	IV	antrum	Diffuse	TP53-	GC-2000639T	69.5	Male	IV	Intestinal	TP53+
TCGA-CG-4443	68.5	Male	I	Body of stomach	TP53+	337	62	Male	II	body	Intestinal	MSI	GC-2000721T	70.9	Male	IV	Diffuse	EMT
TCGA-D7-8576	54.8	Female	III	Gastric antrum	TP53-	338	60	Male	I	antrum	Intestinal	MSI	GC-2000986T	39	Female	IV	Diffuse	EMT
TCGA-BR-8679	63.2	Female	I	Fundus of stomach	TP53-	339	55	Male	I	antrum	Intestinal	TP53-	GC-2001086T	79.6	Male	III	Diffuse	EMT
TCGA-IN-7806	50.4	Male	II	Cardia, NOS	TP53-	341	82	Female	II	body	Diffuse	TP53+	GC-20020195T	68.4	Male	IV	Intestinal	TP53+
TCGA-D7-6815	70.7	Female	II	Body of stomach	TP53-	343	67	Male	IV	cardia	Diffuse	MSI	GC-43658255T	66.6	Male	IV	Intestinal	TP53-
TCGA-BR-4294	65.1	Male	NA	Body of stomach	NA	346	70	Male	I	body, antrum	Intestinal	TP53+	GC-47149013T	77.1	Male	IV	Mixed	EMT
TCGA-BR-8487	64.1	Female	II	Gastric antrum	MSI	355	53	Male	III	body	Intestinal	EMT	GC-990044T	69.1	Male	III	Intestinal	EMT
TCGA-BR-8059	72.5	Male	III	Fundus of stomach	EMT	361	63	Male	III	antrum	Intestinal	MSI	GC-990090T	64.2	Male	III	Intestinal	EMT
TCGA-BR-A4J4	39.6	Male	III	Gastric antrum	MSI	363	84	Male	II	body	Diffuse	EMT	GC-990108T	64.9	Male	II	Intestinal	TP53-
TCGA-BR-8485	68.1	Female	III	Fundus of stomach	TP53-	372	73	Male	III	body	Intestinal	MSI	GC-990170T	40.7	Female	III	Intestinal	EMT
TCGA-CD-A48C	80	Female	II	Gastric antrum	NA	374	74	Male	II	antrum	Indeterminate	MSI	GC-990424T	70.8	Male	III	Diffuse	EMT
TCGA-BR-4361	66.5	Female	III	Stomach, NOS	NA	375	70	Female	II	antrum	Intestinal	TP53-
TCGA-BR-8058	53.9	Female	III	Gastric antrum	EMT	376	72	Female	IV	cardia	Indeterminate	TP53+
TCGA-VQ-A91Z	67.5	Female	III	Gastric antrum	NA	377	37	Female	III	antrum	Diffuse	TP53+
TCGA-BR-7851	74.2	Male	II	Body of stomach	MSI	385	72	Female	III	body	Mixed	MSI
TCGA-FP-8209	49.8	Male	I	Gastric antrum	EMT	388	68	Male	III	body	Intestinal	TP53-
TCGA-VQ-A925	66.4	Male	III	Gastric antrum	NA	394	70	Female	II	antrum	Intestinal	TP53-
TCGA-BR-8591	79.6	Male	III	Gastric antrum	MSI	395	56	Male	III	antrum	Diffuse	MSI
TCGA-D7-8572	57.2	Male	II	Fundus of stomach	EMT	396	77	Male	II	antrum	Intestinal	TP53+
TCGA-BR-8361	71.2	Female	III	Fundus of stomach	MSI	397	66	Male	I	antrum	Intestinal	MSI
TCGA-BR-7197	69.7	Male	II	Gastric antrum	TP53-	399	80	Female	I	antrum	Intestinal	MSI
TCGA-HU-A4H5	71.9	Male	I	Fundus of stomach	TP53+	401	62	Male	III	body	Diffuse	TP53+
TCGA-BR-A4CR	70.3	Female	III	Fundus of stomach	TP53-	402	70	Male	III	antrum	Diffuse	MSI
TCGA-IN-7808	59.1	Male	NA	Cardia, NOS	TP53-	405	68	Male	II	body	Intestinal	TP53+
TCGA-D7-A748	41.6	Female	IV	Fundus of stomach	NA	413	64	Male	III	antrum	Mixed	TP53-
TCGA-HU-8608	70.7	Male	III	Body of stomach	TP53+	414	66	Male	II	cardia	Intestinal	TP53-
TCGA-CD-8532	52.8	Male	II	Cardia, NOS	NA	415	73	Male	IV	body	Diffuse	TP53-
TCGA-VQ-A94O	74.8	Male	III	Gastric antrum	NA	416	66	Female	IV	body	Diffuse	TP53+
TCGA-BR-8686	69.5	Male	III	Gastric antrum	EMT	419	77	Female	IV	cardia	Intestinal	TP53+
TCGA-RD-A8MW	72.8	Male	III	Gastric antrum	NA	420	64	Male	III	cardia	Intestinal	TP53+
TCGA-BR-8687	67	Female	III	Cardia, NOS	TP53+	421	64	Male	IV	body	Intestinal	MSI
TCGA-BR-6455	59.9	Male	II	Body of stomach	MSI	422	66	Male	I	antrum	Intestinal	MSI
TCGA-CG-5721	58.2	Male	IV	Gastric antrum	MSI	423	64	Female	III	antrum	Intestinal	MSI
TCGA-CD-8528	43.8	Female	III	Gastric antrum	NA	424	64	Male	II	body	Intestinal	TP53-
TCGA-BR-4267	51.2	Male	I	Body of stomach	TP53+	425	69	Male	III	antrum	Intestinal	MSI
TCGA-CG-4444	76.5	Male	III	Body of stomach	TP53-	426	74	Male	III	antrum	Intestinal	TP53-
TCGA-BR-4256	80.7	Male	NA	Gastric antrum	NA	427	36	Female	III	body	Diffuse	TP53-
TCGA-RD-A8NB	80.8	Female	III	Cardia, NOS	NA	428	72	Male	IV	antrum	Intestinal	MSI
TCGA-HU-8249	76.7	Male	III	Body of stomach	NA	430	68	Male	II	antrum	Intestinal	TP53-
TCGA-BR-A4J9	55	Male	II	Gastric antrum	NA	431	59	Male	II	antrum	Intestinal	MSI
TCGA-BR-7723	59.8	Male	III	Body of stomach	EMT	432	68	Male	IV	antrum	Diffuse	TP53+
TCGA-FP-7735	77.3	Male	I	Cardia, NOS	TP53-	433	62	Male	III	body	Intestinal	TP53+
TCGA-BR-6707	75.4	Male	II	Body of stomach	TP53-	437	65	Male	IV	antrum	Diffuse	MSI
TCGA-D7-8579	66.1	Female	II	Gastric antrum	EMT	438	66	Female	III	body	Diffuse	TP53+
TCGA-HU-A4GF	69.1	Male	II	Gastric antrum	TP53+	440	54	Male	II	body	Intestinal	EMT
TCGA-BR-8589	56.8	Male	III	Fundus of stomach	TP53+	441	56	Male	III	body	Intestinal	TP53+
TCGA-VQ-AA64	68.8	Male	III	Cardia, NOS	NA	442	70	Male	I	body	Intestinal	TP53-
TCGA-BR-7958	60.8	Male	III	Body of stomach	TP53+	443	65	Male	III	antrum	Intestinal	MSI
TCGA-F1-6875	80	Male	I	Gastric antrum	TP53-	444	57	Male	III	body	Diffuse	TP53-
TCGA-BR-8291	61.8	Male	II	Gastric antrum	EMT	445	78	Male	II	cardia	Diffuse	TP53+
TCGA-VQ-A8E3	79.2	Male	II	Gastric antrum	NA	446	65	Male	II	body	Mixed	TP53+
TCGA-BR-4191	72.8	Male	NA	Stomach, NOS	NA	447	70	Male	II	antrum	Diffuse	TP53-
TCGA-VQ-A922	70.4	Male	IV	Gastric antrum	NA	448	65	Female	IV	antrum	Diffuse	TP53-
TCGA-BR-6456	74.8	Female	II	Body of stomach	EMT	450	54	Male	III	antrum	Intestinal	EMT
TCGA-HU-A4H2	58.9	Female	III	Gastric antrum	TP53-	451	77	Female	IV	antrum	Diffuse	TP53+
TCGA-VQ-A8PQ	50.2	Female	IV	Cardia, NOS	NA	455	63	Male	III	cardia	Diffuse	EMT
TCGA-BR-8484	61.9	Male	III	Fundus of stomach	TP53-	456	31	Female	II	antrum	Intestinal	MSI
TCGA-BR-7196	64.7	Male	IV	Cardia, NOS	EMT	457	68	Male	III	body	Diffuse	EMT
TCGA-R5-A7ZE	66.7	Female	III	Cardia, NOS	NA	459	65	Male	III	antrum	Intestinal	EMT
TCGA-HU-A4GT	71.9	Female	II	Gastric antrum	MSI	460	38	Male	IV	body	Diffuse	EMT
TCGA-RD-A8N2	59.6	Female	I	Gastric antrum	NA	465	77	Female	I	antrum	Intestinal	MSI
TCGA-BR-8373	65.1	Female	III	Fundus of stomach	TP53+	469	55	Male	III	antrum	Intestinal	TP53-
TCGA-VQ-A923	90.1	Male	III	Body of stomach	NA	470	68	Male	I	antrum	Intestinal	TP53-
TCGA-VQ-A927	81.3	Male	III	Body of stomach	NA	471	69	Male	II	antrum	Diffuse	TP53-
TCGA-CD-5804	90.1	Male	NA	Pylorus	NA	476	77	Male	III	body	Intestinal	TP53-
TCGA-D7-6519	64.1	Female	NA	Cardia, NOS	TP53+	477	51	Female	II	antrum	Diffuse	MSI
TCGA-FP-A9TM	77.7	Male	NA	Cardia, NOS	NA	480	75	Female	III	antrum	Intestinal	TP53-
TCGA-CG-5724	59.6	Male	IV	Gastric antrum	TP53-	482	42	Female	I	fundus, body, antrum	Diffuse	EMT
TCGA-CD-8534	41.7	Male	II	Gastric antrum	NA	483	67	Male	II	body	Intestinal	TP53+
TCGA-CG-4441	83.6	Male	III	Body of stomach	TP53+	485	66	Male	I	antrum	Mixed	MSI
TCGA-VQ-A8DU	63.1	Male	III	Gastric antrum	NA	488	64	Male	I	body	Intestinal	TP53+
TCGA-BR-7722	62.2	Male	II	Cardia, NOS	TP53-	489	41	Male	IV	body	Diffuse	EMT
TCGA-CD-8524	61.5	Female	II	Gastric antrum	NA	493	64	Female	I	antrum	Mixed	MSI
TCGA-D7-A747	57.3	Male	II	Gastric antrum	NA	501	52	Male	I	body	Intestinal	MSI
TCGA-D7-6528	70.7	Female	I	Body of stomach	TP53-	502	70	Male	II	body	Intestinal	TP53-
TCGA-BR-8483	59.5	Male	III	Gastric antrum	NA	503	86	Female	IV	antrum	Intestinal	EMT
TCGA-FP-8631	68.2	Male	III	Cardia, NOS	TP53+	505	54	Male	III	antrum	Intestinal	MSI
TCGA-BR-7716	62.5	Female	II	Body of stomach	TP53+	510	62	Male	III	body and antrum	Mixed	MSI
TCGA-BR-8368	84.6	Female	I	Fundus of stomach	MSI	514	67	Female	II	body	Diffuse	TP53+
TCGA-CD-A486	68.2	Male	II	Cardia, NOS	NA	516	75	Male	II	antrum	Intestinal	MSI
TCGA-CG-4465	69.1	Female	IV	Gastric antrum	MSI	517	70	Female	II	antrum	Intestinal	MSI
TCGA-D7-8578	72.9	Male	I	Gastric antrum	EMT	518	61	Female	IV	body	Diffuse	TP53-
TCGA-HU-A4GC	74.7	Male	III	Gastric antrum	TP53+	519	57	Male	IV	cardia and body	Diffuse	TP53+
TCGA-D7-8570	44.2	Male	III	Cardia, NOS	EMT	520	72	Female	I	antrum	Intestinal	TP53-
TCGA-CG-5723	83.2	Male	II	Cardia, NOS	MSI	522	79	Male	II	body	Intestinal	TP53+
TCGA-BR-4280	78.1	Female	III	Stomach, NOS	MSI	523	76	Male	I	antrum	Intestinal	MSI
TCGA-IN-AB1X	78.1	Female	II	Cardia, NOS	NA	524	65	Male	III	body	Intestinal	TP53-
TCGA-VQ-A8P3	72.8	Male	III	Body of stomach	NA	525	56	Male	II	cardia	Intestinal	TP53+
TCGA-BR-6802	65.5	Male	III	Body of stomach	MSI	528	63	Male	IV	body	Intestinal	TP53-
TCGA-BR-8590	62.8	Male	III	Fundus of stomach	EMT	529	54	Female	I	body	Diffuse	MSI
TCGA-CG-4442	85.9	Male	I	Gastric antrum	NA	532	74	Male	III	cardia	Intestinal	TP53+
TCGA-BR-8680	45.6	Male	IV	Gastric antrum	TP53+	533	36	Male	III	body	Diffuse	TP53+
TCGA-CD-8535	59.1	Male	III	Fundus of stomach	NA	534	77	Male	II	antrum	?Diffuse/ ?Diffuse/ ?Intestinal	TP53+
TCGA-CD-5801	NA	Male	III	Gastric antrum	TP53+	538	50	Male	III	body	Diffuse	TP53+
TCGA-CG-5732	66.8	Male	IV	Cardia, NOS	TP53-	540	53	Female	I	antrum	Diffuse	MSI
TCGA-BR-4257	79.5	Female	NA	Gastric antrum	NA	541	49	Male	IV	body	Diffuse	EMT
TCGA-D7-5577	53.9	Female	III	Cardia, NOS	TP53+	544	52	Male	I	antrum	Intestinal	MSI
TCGA-BR-4368	78.8	Female	IV	Gastric antrum	NA	547	74	Male	I	cardia	Intestinal	MSI
TCGA-BR-7957	50.7	Female	IV	Body of stomach	EMT	550	33	Female	III	cardia and body	Diffuse	TP53-
TCGA-F1-A72C	68.8	Male	II	Stomach, NOS	NA	551	53	Female	I	antrum	Intestinal	TP53-
TCGA-CG-5718	78.8	Female	II	Body of stomach	TP53-	554	74	Male	I	body	Intestinal	TP53-
TCGA-B7-A5TK	51.4	Male	III	Fundus of stomach	NA	556	56	Male	I	body	Intestinal	TP53+
TCGA-HU-8604	82.7	Female	II	Gastric antrum	EMT	557	66	Male	I	antrum	Intestinal	TP53-
TCGA-D7-6818	53.1	Male	III	Body of stomach	EMT	559	51	Male	II	body	Intestinal	TP53+
TCGA-BR-8683	75.5	Male	III	Gastric antrum	EMT	560	78	Female	I	antrum	Intestinal	TP53-
TCGA-BR-6563	60.1	Male	II	Gastric antrum	EMT	561	60	Male	I	antrum	Intestinal	TP53+
TCGA-HU-A4GY	77	Female	III	Gastric antrum	EMT	566	60	Female	II	cardia	Intestinal	TP53+
TCGA-B7-A5TJ	74.1	Male	II	Fundus of stomach	NA	571	65	Female	I	antrum	Intestinal	MSI
TCGA-CG-5719	54.7	Female	IV	Body of stomach	NA	584	60	Male	III	body	Intestinal	MSI
TCGA-CG-5726	74	Male	I	Gastric antrum	TP53-	586	56	Male	IV	cardia	Intestinal	TP53-
TCGA-BR-A4CS	77.3	Male	III	Fundus of stomach	TP53-	588	66	Male	II	antrum	Diffuse	TP53-
TCGA-D7-6521	65.1	Male	NA	Body of stomach	TP53-	589	53	Male	I	body	Diffuse	EMT
TCGA-BR-8677	74.6	Female	III	Gastric antrum	NA	592	44	Female	IV	body	Diffuse	TP53-
TCGA-VQ-AA6F	58	Male	II	Cardia, NOS	NA	595	74	Male	II	antrum	Diffuse	MSI
TCGA-BR-6453	55	Male	II	Body of stomach	EMT	596	53	Male	III	body, antrum	Diffuse	MSI
TCGA-VQ-A8PK	58.7	Male	III	Cardia, NOS	NA	603	72	Female	IV	antrum	Intestinal	MSI
TCGA-CD-A48A	57.1	Male	II	Cardia, NOS	NA
TCGA-3M-AB47	NA	Male	III	Stomach, NOS	NA
TCGA-CD-8530	52	Male	II	Fundus of stomach	NA
TCGA-BR-8077	58.7	Female	III	Body of stomach	TP53-
TCGA-CG-4305	69.3	Male	II	Gastric antrum	MSI
TCGA-CD-A4MG	76.8	Male	II	Cardia, NOS	NA
TCGA-VQ-AA68	52.9	Female	III	Cardia, NOS	NA
TCGA-MX-A663	66.9	Male	II	Stomach, NOS	NA
TCGA-CG-4306	90.1	Male	IV	Gastric antrum	MSI
TCGA-BR-6566	64.1	Female	II	Body of stomach	TP53-
TCGA-D7-6524	53.5	Male	II	Gastric antrum	TP53+
TCGA-BR-8367	56	Male	III	Fundus of stomach	EMT
TCGA-BR-8364	42.2	Female	III	Fundus of stomach	EMT
TCGA-BR-6801	70.2	Male	II	Body of stomach	TP53+
TCGA-CG-4301	75.4	Female	IV	Cardia, NOS	TP53+
TCGA-BR-6454	58.9	Male	II	Cardia, NOS	NA
TCGA-RD-A8N1	70.5	Male	III	Body of stomach	NA
TCGA-F1-6874	79.7	Male	I	Cardia, NOS	MSI
TCGA-BR-4201	66.7	Female	NA	Cardia, NOS	EMT
Note: cases in bold script also included normal adjacent tissue samples.

## Sheet: Supplementary Table S2
13 weighting scenarios used for motif scoring
	W1	W2	W3	W4
Scenario 1	1	0	0	0
Scenario 2	0	0	1	0
Scenario 3	0	0	0	1
Scenario 4	0.25	0	0	0.75
Scenario 5	0	0.25	0	0.75
Scenario 6	0	0	0.25	0.75
Scenario 7	0.125	0.125	0	0.75
Scenario 8	0.125	0	0.125	0.75
Scenario 9	0	0.125	0.125	0.75
Scenario 10	0.0625	0.0625	0.125	0.75
Scenario 11	0.0625	0.125	0.0625	0.75
Scenario 12	0.125	0.0625	0.0625	0.75
Scenario 13	0.25	0.25	0.25	0.25

## Sheet: Supplementary Table S3
List of the members of all the 14 co-expression modules identified by WGCNA
IGKV3-11 module	TPX2 module	MAP4K1 module	PRPF39 module	EEF1A1P12 module	HAVCR2 module	MMRN2 module	ZNF598 module	NACA4P module	RPS16 module	RPL21P98 module	COL1A2 module	EMT module	AHSA2P module
ENSG00000048462.9	ENSG00000000460.15	ENSG00000000938.11	ENSG00000029363.14	ENSG00000124181.13	ENSG00000002549.11	ENSG00000005102.11	ENSG00000007047.13	ENSG00000136149.6	ENSG00000004779.8	ENSG00000213343.5	ENSG00000038427.14	ENSG00000004776.10	ENSG00000003756.15
ENSG00000051108.13	ENSG00000001497.15	ENSG00000004468.11	ENSG00000053900.9	ENSG00000139239.7	ENSG00000011600.10	ENSG00000010319.5	ENSG00000011304.15	ENSG00000137970.7	ENSG00000008988.8	ENSG00000213885.3	ENSG00000078098.12	ENSG00000004799.7	ENSG00000004534.13
ENSG00000099958.13	ENSG00000004487.14	ENSG00000005471.14	ENSG00000066422.4	ENSG00000146677.7	ENSG00000038945.13	ENSG00000031081.9	ENSG00000014164.6	ENSG00000177350.6	ENSG00000053501.11	ENSG00000214760.2	ENSG00000087116.12	ENSG00000005243.8	ENSG00000009724.15
ENSG00000102096.9	ENSG00000005189.18	ENSG00000005844.16	ENSG00000075292.17	ENSG00000151846.8	ENSG00000060558.3	ENSG00000037280.14	ENSG00000039650.8	ENSG00000180389.6	ENSG00000063177.11	ENSG00000220793.5	ENSG00000087303.15	ENSG00000006128.10	ENSG00000013441.14
ENSG00000116748.18	ENSG00000006625.16	ENSG00000007129.16	ENSG00000077458.11	ENSG00000169253.3	ENSG00000066336.10	ENSG00000053702.13	ENSG00000063169.9	ENSG00000198420.8	ENSG00000071082.9	ENSG00000223676.1	ENSG00000102359.5	ENSG00000007866.17	ENSG00000032219.17
ENSG00000128322.6	ENSG00000006634.6	ENSG00000007264.12	ENSG00000080345.16	ENSG00000172746.6	ENSG00000085514.14	ENSG00000064989.11	ENSG00000063244.11	ENSG00000200693.2	ENSG00000083845.7	ENSG00000225419.1	ENSG00000108821.12	ENSG00000008441.15	ENSG00000066427.20
ENSG00000132465.9	ENSG00000007968.6	ENSG00000007312.11	ENSG00000082258.11	ENSG00000172974.11	ENSG00000088827.11	ENSG00000066056.12	ENSG00000063245.13	ENSG00000205871.5	ENSG00000089009.14	ENSG00000228665.2	ENSG00000111799.19	ENSG00000008710.16	ENSG00000075826.15
ENSG00000153789.11	ENSG00000010165.18	ENSG00000008516.15	ENSG00000095564.12	ENSG00000174572.3	ENSG00000091106.17	ENSG00000069122.17	ENSG00000065000.14	ENSG00000210144.1	ENSG00000089157.14	ENSG00000229503.1	ENSG00000113083.11	ENSG00000010244.15	ENSG00000080947.13
ENSG00000167476.9	ENSG00000010292.11	ENSG00000009790.13	ENSG00000112200.15	ENSG00000175886.10	ENSG00000095970.15	ENSG00000088320.3	ENSG00000070047.10	ENSG00000212283.1	ENSG00000090266.11	ENSG00000229605.5	ENSG00000113140.9	ENSG00000010803.15	ENSG00000099326.7
ENSG00000170476.14	ENSG00000011260.12	ENSG00000010610.8	ENSG00000112701.16	ENSG00000176183.8	ENSG00000100292.15	ENSG00000099260.9	ENSG00000070814.16	ENSG00000213087.3	ENSG00000099795.5	ENSG00000230777.1	ENSG00000117122.12	ENSG00000011454.15	ENSG00000100068.10
ENSG00000183508.4	ENSG00000011376.8	ENSG00000010671.14	ENSG00000115524.14	ENSG00000179157.4	ENSG00000101336.11	ENSG00000099998.16	ENSG00000071564.13	ENSG00000213183.3	ENSG00000099956.16	ENSG00000232429.3	ENSG00000130635.14	ENSG00000011465.15	ENSG00000100483.12
ENSG00000185155.10	ENSG00000011426.9	ENSG00000011590.12	ENSG00000115827.12	ENSG00000181524.6	ENSG00000101916.11	ENSG00000100034.12	ENSG00000071626.15	ENSG00000213291.3	ENSG00000100138.12	ENSG00000232858.1	ENSG00000132000.10	ENSG00000011523.12	ENSG00000100813.13
ENSG00000188403.7	ENSG00000011485.13	ENSG00000012124.13	ENSG00000116001.14	ENSG00000185839.3	ENSG00000102575.9	ENSG00000101331.14	ENSG00000072518.19	ENSG00000213315.5	ENSG00000100216.5	ENSG00000234004.4	ENSG00000137573.12	ENSG00000012822.14	ENSG00000101104.11
ENSG00000197476.3	ENSG00000012048.18	ENSG00000013725.13	ENSG00000118412.11	ENSG00000187504.6	ENSG00000103569.8	ENSG00000102010.13	ENSG00000079313.10	ENSG00000213621.3	ENSG00000100294.11	ENSG00000234268.1	ENSG00000140937.12	ENSG00000015475.17	ENSG00000102878.14
ENSG00000211592.5	ENSG00000013275.6	ENSG00000015285.9	ENSG00000120798.15	ENSG00000188375.4	ENSG00000105383.13	ENSG00000104967.6	ENSG00000079432.6	ENSG00000213849.3	ENSG00000100316.14	ENSG00000235776.2	ENSG00000148848.13	ENSG00000016082.13	ENSG00000109046.13
ENSG00000211598.2	ENSG00000013306.14	ENSG00000019582.13	ENSG00000122435.8	ENSG00000188460.4	ENSG00000107798.16	ENSG00000105538.7	ENSG00000080603.15	ENSG00000213860.4	ENSG00000100348.8	ENSG00000237749.4	ENSG00000149380.10	ENSG00000017427.14	ENSG00000109920.11
ENSG00000211599.2	ENSG00000013810.17	ENSG00000020633.17	ENSG00000123552.16	ENSG00000188765.7	ENSG00000110079.15	ENSG00000106852.14	ENSG00000083812.10	ENSG00000213864.3	ENSG00000100353.16	ENSG00000238085.1	ENSG00000151388.9	ENSG00000018236.13	ENSG00000113240.11
ENSG00000211611.2	ENSG00000014138.7	ENSG00000023445.12	ENSG00000132485.11	ENSG00000188873.4	ENSG00000110852.4	ENSG00000106991.12	ENSG00000083838.14	ENSG00000214016.3	ENSG00000103363.13	ENSG00000238103.4	ENSG00000157227.11	ENSG00000018408.13	ENSG00000113971.17
ENSG00000211625.2	ENSG00000024526.15	ENSG00000023892.10	ENSG00000133858.14	ENSG00000196183.5	ENSG00000111729.11	ENSG00000107951.11	ENSG00000084774.12	ENSG00000214182.5	ENSG00000104408.8	ENSG00000239470.3	ENSG00000159216.17	ENSG00000018625.13	ENSG00000114841.16
ENSG00000211632.3	ENSG00000025772.7	ENSG00000026751.15	ENSG00000159086.13	ENSG00000197744.5	ENSG00000114013.14	ENSG00000110786.16	ENSG00000085872.13	ENSG00000214748.2	ENSG00000104979.7	ENSG00000239797.1	ENSG00000162493.15	ENSG00000018869.15	ENSG00000114857.16
ENSG00000211637.2	ENSG00000028528.13	ENSG00000026950.15	ENSG00000162601.8	ENSG00000204253.4	ENSG00000116701.13	ENSG00000110799.12	ENSG00000087152.14	ENSG00000214784.4	ENSG00000105193.7	ENSG00000240125.1	ENSG00000164294.12	ENSG00000019144.15	ENSG00000116754.12
ENSG00000211638.2	ENSG00000029993.13	ENSG00000028277.19	ENSG00000163867.15	ENSG00000212695.5	ENSG00000119535.16	ENSG00000112214.9	ENSG00000088247.14	ENSG00000219023.1	ENSG00000105258.7	ENSG00000240231.1	ENSG00000164692.16	ENSG00000019991.14	ENSG00000117616.16
ENSG00000211640.3	ENSG00000030066.12	ENSG00000035720.6	ENSG00000164073.8	ENSG00000212802.4	ENSG00000119655.7	ENSG00000113555.5	ENSG00000099381.15	ENSG00000219222.1	ENSG00000105372.5	ENSG00000240238.1	ENSG00000164694.15	ENSG00000020577.12	ENSG00000118058.19
ENSG00000211644.2	ENSG00000032389.11	ENSG00000043462.10	ENSG00000175455.13	ENSG00000213026.4	ENSG00000127507.16	ENSG00000116016.12	ENSG00000099821.12	ENSG00000219274.1	ENSG00000105640.11	ENSG00000240634.1	ENSG00000164932.11	ENSG00000021645.16	ENSG00000119707.12
ENSG00000211645.2	ENSG00000035141.6	ENSG00000049768.13	ENSG00000178338.9	ENSG00000213169.3	ENSG00000129450.7	ENSG00000118946.10	ENSG00000100401.18	ENSG00000220842.6	ENSG00000106153.12	ENSG00000240674.1	ENSG00000168542.11	ENSG00000022267.15	ENSG00000119737.5
ENSG00000211648.2	ENSG00000035499.11	ENSG00000050730.14	ENSG00000185246.16	ENSG00000213235.3	ENSG00000131042.12	ENSG00000120156.19	ENSG00000100726.13	ENSG00000225405.3	ENSG00000107223.11	ENSG00000240759.1	ENSG00000169604.18	ENSG00000023902.12	ENSG00000121454.5
ENSG00000211649.3	ENSG00000037474.13	ENSG00000055163.17	ENSG00000197056.8	ENSG00000213275.2	ENSG00000132205.9	ENSG00000120279.6	ENSG00000102858.11	ENSG00000225475.1	ENSG00000108107.11	ENSG00000241612.1	ENSG00000186340.13	ENSG00000024422.10	ENSG00000122257.17
ENSG00000211650.2	ENSG00000040275.15	ENSG00000056558.9	ENSG00000214367.6	ENSG00000213290.4	ENSG00000132965.8	ENSG00000122679.7	ENSG00000103199.12	ENSG00000226084.5	ENSG00000108298.8	ENSG00000242640.1	ENSG00000198108.3	ENSG00000030304.11	ENSG00000122432.15
ENSG00000211651.3	ENSG00000041802.9	ENSG00000065413.15	ENSG00000258890.5	ENSG00000213293.4	ENSG00000134028.13	ENSG00000123933.13	ENSG00000103495.12	ENSG00000226532.1	ENSG00000109390.10	ENSG00000243071.1	ENSG00000204262.10	ENSG00000031003.9	ENSG00000126214.19
ENSG00000211652.2	ENSG00000042088.12	ENSG00000065675.13		ENSG00000213296.4	ENSG00000134955.10	ENSG00000124019.9	ENSG00000104805.14	ENSG00000227462.1	ENSG00000109475.15	ENSG00000244021.4	ENSG00000225614.2	ENSG00000034971.13	ENSG00000127364.3
ENSG00000211653.2	ENSG00000044574.7	ENSG00000066294.13		ENSG00000213309.3	ENSG00000135077.7	ENSG00000125810.9	ENSG00000104866.9	ENSG00000227525.4	ENSG00000109919.8	ENSG00000265936.1	ENSG00000272841.1	ENSG00000035403.15	ENSG00000127957.15
ENSG00000211658.2	ENSG00000048740.16	ENSG00000068831.17		ENSG00000213312.3	ENSG00000135838.12	ENSG00000126895.12	ENSG00000104885.16	ENSG00000227615.1	ENSG00000110700.5			ENSG00000038295.6	ENSG00000131797.11
ENSG00000211659.2	ENSG00000049541.9	ENSG00000069493.13		ENSG00000213326.4	ENSG00000136040.7	ENSG00000127528.5	ENSG00000104946.9	ENSG00000227770.1	ENSG00000111639.6			ENSG00000041982.13	ENSG00000132424.13
ENSG00000211660.3	ENSG00000051180.15	ENSG00000070190.11		ENSG00000213352.3	ENSG00000136235.14	ENSG00000129467.12	ENSG00000104960.14	ENSG00000228224.3	ENSG00000111669.13			ENSG00000046653.13	ENSG00000133624.12
ENSG00000211662.2	ENSG00000051341.12	ENSG00000070915.8		ENSG00000213376.4	ENSG00000136867.9	ENSG00000130201.6	ENSG00000104973.13	ENSG00000228360.1	ENSG00000111775.2			ENSG00000046889.17	ENSG00000134186.10
ENSG00000211663.2	ENSG00000051596.8	ENSG00000072682.17		ENSG00000213394.3	ENSG00000136869.13	ENSG00000130300.7	ENSG00000104983.7	ENSG00000228462.1	ENSG00000112306.7			ENSG00000047644.16	ENSG00000134884.12
ENSG00000211664.2	ENSG00000052802.11	ENSG00000072694.17		ENSG00000213442.5	ENSG00000137462.6	ENSG00000130307.10	ENSG00000105063.17	ENSG00000228929.1	ENSG00000112695.10			ENSG00000047648.20	ENSG00000135164.17
ENSG00000211665.2	ENSG00000058262.8	ENSG00000072786.11		ENSG00000213478.2	ENSG00000139572.3	ENSG00000131370.14	ENSG00000105221.15	ENSG00000229659.1	ENSG00000113734.16			ENSG00000047849.20	ENSG00000135976.15
ENSG00000211666.2	ENSG00000058804.11	ENSG00000072818.10		ENSG00000213539.4	ENSG00000143226.12	ENSG00000131477.9	ENSG00000105321.11	ENSG00000230629.2	ENSG00000114391.11			ENSG00000048342.14	ENSG00000137504.12
ENSG00000211668.2	ENSG00000062822.11	ENSG00000072858.9		ENSG00000213553.4	ENSG00000146070.15	ENSG00000131634.12	ENSG00000105323.15	ENSG00000230734.1	ENSG00000114942.12			ENSG00000048540.13	ENSG00000138834.11
ENSG00000211669.2	ENSG00000064419.12	ENSG00000073861.2		ENSG00000213598.4	ENSG00000147416.9	ENSG00000132622.9	ENSG00000105676.12	ENSG00000230783.1	ENSG00000115268.8			ENSG00000049323.14	ENSG00000139631.17
ENSG00000211670.2	ENSG00000064601.15	ENSG00000074706.12		ENSG00000213790.2	ENSG00000150337.12	ENSG00000134817.10	ENSG00000105723.10	ENSG00000230837.1	ENSG00000116898.10			ENSG00000050030.12	ENSG00000139908.13
ENSG00000211673.2	ENSG00000065328.15	ENSG00000074966.9		ENSG00000213791.4	ENSG00000154589.5	ENSG00000135363.10	ENSG00000105726.15	ENSG00000231409.3	ENSG00000117118.8			ENSG00000050628.19	ENSG00000142396.9
ENSG00000211677.2	ENSG00000065609.13	ENSG00000075884.11		ENSG00000213820.3	ENSG00000155659.13	ENSG00000136114.14	ENSG00000105732.11	ENSG00000231767.3	ENSG00000117543.18			ENSG00000050767.14	ENSG00000145075.10
ENSG00000211679.2	ENSG00000065911.10	ENSG00000076662.8		ENSG00000213851.3	ENSG00000158714.9	ENSG00000139155.7	ENSG00000108262.14	ENSG00000231940.1	ENSG00000118181.9			ENSG00000053254.14	ENSG00000146067.14
ENSG00000211890.3	ENSG00000066117.13	ENSG00000077420.14		ENSG00000213857.3	ENSG00000158869.9	ENSG00000139549.2	ENSG00000115568.14	ENSG00000232083.3	ENSG00000119013.7			ENSG00000053328.8	ENSG00000147162.12
ENSG00000211893.3	ENSG00000066279.15	ENSG00000077984.5		ENSG00000213862.4	ENSG00000159189.10	ENSG00000147113.15	ENSG00000116809.10	ENSG00000232573.1	ENSG00000119705.8			ENSG00000053438.8	ENSG00000147437.8
ENSG00000211895.4	ENSG00000067704.9	ENSG00000078081.6		ENSG00000213867.4	ENSG00000160883.9	ENSG00000147119.3	ENSG00000119574.11	ENSG00000234498.3	ENSG00000122026.9			ENSG00000055118.13	ENSG00000151006.7
ENSG00000211896.5	ENSG00000068120.13	ENSG00000078589.11		ENSG00000213942.3	ENSG00000163131.9	ENSG00000149564.10	ENSG00000123064.11	ENSG00000234683.1	ENSG00000122406.11			ENSG00000058272.14	ENSG00000152117.16
ENSG00000211897.6	ENSG00000068489.11	ENSG00000078596.9		ENSG00000213950.2	ENSG00000163563.7	ENSG00000150048.9	ENSG00000125912.9	ENSG00000234742.1	ENSG00000123144.9			ENSG00000058668.13	ENSG00000158805.10
ENSG00000211904.2	ENSG00000071539.12	ENSG00000079215.12		ENSG00000214027.3	ENSG00000163823.3	ENSG00000154133.13	ENSG00000126461.13	ENSG00000235175.1	ENSG00000123349.12			ENSG00000059915.15	ENSG00000161010.13
ENSG00000211933.2	ENSG00000072274.11	ENSG00000079263.17		ENSG00000214089.3	ENSG00000167850.3	ENSG00000154734.13	ENSG00000126464.12	ENSG00000235582.2	ENSG00000124614.12			ENSG00000061918.11	ENSG00000162825.15
ENSG00000211934.3	ENSG00000072571.18	ENSG00000081237.17		ENSG00000214144.3	ENSG00000167851.12	ENSG00000157368.9	ENSG00000127616.16	ENSG00000235828.5	ENSG00000125356.6			ENSG00000064300.7	ENSG00000163126.13
ENSG00000211937.3	ENSG00000073111.12	ENSG00000081320.9		ENSG00000214199.3	ENSG00000168995.12	ENSG00000157510.12	ENSG00000129351.16	ENSG00000236844.1	ENSG00000125445.9			ENSG00000064309.13	ENSG00000163660.10
ENSG00000211938.2	ENSG00000075218.17	ENSG00000081985.9		ENSG00000214203.4	ENSG00000169495.4	ENSG00000157554.17	ENSG00000130299.15	ENSG00000236976.1	ENSG00000125652.6			ENSG00000064999.13	ENSG00000163728.9
ENSG00000211941.3	ENSG00000075702.15	ENSG00000082074.14		ENSG00000214255.5	ENSG00000170458.12	ENSG00000161835.9	ENSG00000130479.9	ENSG00000237170.3	ENSG00000125691.11			ENSG00000065320.7	ENSG00000163806.14
ENSG00000211942.3	ENSG00000076003.4	ENSG00000083454.20		ENSG00000214259.3	ENSG00000170909.12	ENSG00000161940.9	ENSG00000130749.8	ENSG00000239223.3	ENSG00000125743.9			ENSG00000065325.11	ENSG00000164707.14
ENSG00000211943.2	ENSG00000076382.15	ENSG00000083799.16		ENSG00000214297.3	ENSG00000171051.7	ENSG00000162367.10	ENSG00000132005.7	ENSG00000239524.2	ENSG00000126067.10			ENSG00000065534.17	ENSG00000165121.10
ENSG00000211945.2	ENSG00000076604.13	ENSG00000083814.11		ENSG00000214389.2	ENSG00000171860.4	ENSG00000162618.11	ENSG00000132382.13	ENSG00000239559.2	ENSG00000126756.10			ENSG00000065600.11	ENSG00000165494.9
ENSG00000211946.3	ENSG00000076826.8	ENSG00000084070.10		ENSG00000214460.3	ENSG00000173369.14	ENSG00000163239.11	ENSG00000133247.12	ENSG00000240463.1	ENSG00000129562.9			ENSG00000065802.10	ENSG00000165525.16
ENSG00000211947.2	ENSG00000077348.7	ENSG00000086730.15		ENSG00000214485.6	ENSG00000173372.15	ENSG00000164035.8	ENSG00000133275.14	ENSG00000240652.1	ENSG00000130165.9			ENSG00000065882.14	ENSG00000166343.8
ENSG00000211949.3	ENSG00000079462.6	ENSG00000086967.9		ENSG00000214541.3	ENSG00000174837.13	ENSG00000164736.5	ENSG00000141456.13	ENSG00000240828.1	ENSG00000130255.11			ENSG00000066382.15	ENSG00000166762.15
ENSG00000211950.2	ENSG00000079616.11	ENSG00000087589.15		ENSG00000214908.3	ENSG00000175489.9	ENSG00000166265.10	ENSG00000141568.18	ENSG00000242060.1	ENSG00000130811.9			ENSG00000066629.15	ENSG00000167524.13
ENSG00000211951.2	ENSG00000080189.13	ENSG00000089012.13		ENSG00000215093.3	ENSG00000177575.11	ENSG00000167874.6	ENSG00000141858.10	ENSG00000242314.1	ENSG00000131174.4			ENSG00000066933.14	ENSG00000167615.15
ENSG00000211952.3	ENSG00000080503.18	ENSG00000089041.15		ENSG00000215467.2	ENSG00000180113.14	ENSG00000169291.8	ENSG00000142002.15	ENSG00000242327.1	ENSG00000131469.11			ENSG00000067113.15	ENSG00000167978.15
ENSG00000211955.2	ENSG00000080839.10	ENSG00000089820.14		ENSG00000215899.3	ENSG00000182578.12	ENSG00000169418.9	ENSG00000142208.14	ENSG00000243181.2	ENSG00000131495.7			ENSG00000067840.11	ENSG00000168010.9
ENSG00000211956.2	ENSG00000080986.11	ENSG00000090554.11		ENSG00000216624.2	ENSG00000186074.17	ENSG00000169744.11	ENSG00000142409.5	ENSG00000243672.1	ENSG00000133112.15			ENSG00000068024.15	ENSG00000168255.17
ENSG00000211957.2	ENSG00000081189.12	ENSG00000093072.14		ENSG00000217026.3	ENSG00000186818.11	ENSG00000170989.8	ENSG00000142453.10	ENSG00000244086.1	ENSG00000134419.14			ENSG00000068305.16	ENSG00000168970.19
ENSG00000211961.3	ENSG00000083093.8	ENSG00000095370.18		ENSG00000217027.1	ENSG00000187037.7	ENSG00000173269.12	ENSG00000142544.6	ENSG00000244245.1	ENSG00000134809.7			ENSG00000068383.17	ENSG00000172650.11
ENSG00000211962.2	ENSG00000084090.12	ENSG00000096996.14		ENSG00000217130.1	ENSG00000187116.12	ENSG00000173706.11	ENSG00000143373.16	ENSG00000249222.1	ENSG00000135390.16			ENSG00000068615.15	ENSG00000173209.21
ENSG00000211964.3	ENSG00000084463.6	ENSG00000100055.19		ENSG00000217716.3	ENSG00000187474.4	ENSG00000174059.15	ENSG00000148840.9	ENSG00000249617.1	ENSG00000135940.5			ENSG00000068976.12	ENSG00000173575.17
ENSG00000211965.3	ENSG00000085840.11	ENSG00000100060.16		ENSG00000218175.2	ENSG00000196209.11	ENSG00000174640.11	ENSG00000149503.11	ENSG00000250321.1	ENSG00000136810.11			ENSG00000069431.9	ENSG00000174353.16
ENSG00000211966.2	ENSG00000085999.10	ENSG00000100100.11		ENSG00000218208.1	ENSG00000197405.6	ENSG00000174804.3	ENSG00000149930.16	ENSG00000251062.1	ENSG00000136942.13			ENSG00000069535.13	ENSG00000174501.13
ENSG00000211967.3	ENSG00000086232.11	ENSG00000100298.14		ENSG00000218227.3	ENSG00000198019.11	ENSG00000175899.13	ENSG00000150990.6	ENSG00000253945.1	ENSG00000137133.9			ENSG00000069702.9	ENSG00000175265.16
ENSG00000211968.3	ENSG00000086827.7	ENSG00000100351.15		ENSG00000218426.5	ENSG00000203747.8	ENSG00000176435.6	ENSG00000154370.12	ENSG00000259121.2	ENSG00000137154.11			ENSG00000070193.4	ENSG00000178297.11
ENSG00000211970.3	ENSG00000087087.17	ENSG00000100365.13		ENSG00000218582.2	ENSG00000204472.11	ENSG00000178031.14	ENSG00000156860.14	ENSG00000266402.3	ENSG00000137818.10			ENSG00000070808.14	ENSG00000178440.5
ENSG00000211972.2	ENSG00000087338.4	ENSG00000100368.12		ENSG00000219146.1	ENSG00000204482.9	ENSG00000178175.10	ENSG00000156983.14	ENSG00000266944.1	ENSG00000138326.17			ENSG00000071205.10	ENSG00000178852.14
ENSG00000211973.2	ENSG00000087365.13	ENSG00000100385.12		ENSG00000219451.3	ENSG00000204577.10	ENSG00000179348.10	ENSG00000160392.12	ENSG00000267449.1	ENSG00000138382.12			ENSG00000071967.10	ENSG00000179038.8
ENSG00000211976.2	ENSG00000087586.16	ENSG00000100450.11		ENSG00000219747.1	ENSG00000214212.7	ENSG00000179776.16	ENSG00000160633.11	ENSG00000269244.1	ENSG00000140988.14			ENSG00000071991.7	ENSG00000179406.6
ENSG00000223350.2	ENSG00000088038.16	ENSG00000100721.9		ENSG00000219951.4	ENSG00000224397.4	ENSG00000179855.5	ENSG00000160877.5	ENSG00000269888.1	ENSG00000140990.13			ENSG00000072110.12	ENSG00000179532.11
ENSG00000223648.3	ENSG00000088298.11	ENSG00000101082.12		ENSG00000220105.2	ENSG00000251442.4	ENSG00000179921.13	ENSG00000161618.8	ENSG00000276967.1	ENSG00000141552.16			ENSG00000072163.17	ENSG00000180376.15
ENSG00000223931.2	ENSG00000088325.14	ENSG00000101445.8		ENSG00000220267.1	ENSG00000260314.2	ENSG00000183615.5	ENSG00000161847.12	ENSG00000279225.1	ENSG00000142168.13			ENSG00000072195.13	ENSG00000180747.14
ENSG00000224041.3	ENSG00000088356.5	ENSG00000102245.6		ENSG00000220472.1	ENSG00000268849.4	ENSG00000183807.7	ENSG00000165458.12	ENSG00000279252.1	ENSG00000142507.8			ENSG00000072840.11	ENSG00000183458.12
ENSG00000224373.3	ENSG00000089597.15	ENSG00000102524.10		ENSG00000223460.1		ENSG00000184113.9	ENSG00000165684.3		ENSG00000142534.5			ENSG00000072952.17	ENSG00000183718.5
ENSG00000224607.4	ENSG00000089685.13	ENSG00000102879.14		ENSG00000223529.1		ENSG00000185291.9	ENSG00000166987.13		ENSG00000142541.15			ENSG00000073711.9	ENSG00000184465.14
ENSG00000224650.2	ENSG00000090060.16	ENSG00000102962.4		ENSG00000223668.1		ENSG00000186994.10	ENSG00000167395.10		ENSG00000142676.11			ENSG00000073712.12	ENSG00000185158.11
ENSG00000225698.3	ENSG00000090372.13	ENSG00000102970.9		ENSG00000223822.2		ENSG00000187513.8	ENSG00000167491.16		ENSG00000142937.10			ENSG00000075035.8	ENSG00000185485.13
ENSG00000228325.5	ENSG00000090447.10	ENSG00000103365.14		ENSG00000223916.1		ENSG00000197245.4	ENSG00000167548.13		ENSG00000143947.11			ENSG00000075073.13	ENSG00000185495.9
ENSG00000229092.2	ENSG00000090520.9	ENSG00000103522.14		ENSG00000224004.2		ENSG00000198844.9	ENSG00000167625.9		ENSG00000143977.12			ENSG00000076555.14	ENSG00000185684.11
ENSG00000231292.6	ENSG00000090889.11	ENSG00000104814.11		ENSG00000224282.3		ENSG00000203883.6	ENSG00000167685.13		ENSG00000144713.11			ENSG00000076706.13	ENSG00000185864.15
ENSG00000231331.1	ENSG00000091127.12	ENSG00000104894.10		ENSG00000224415.1		ENSG00000204301.6	ENSG00000167962.11		ENSG00000145425.8			ENSG00000077152.8	ENSG00000185946.14
ENSG00000231475.3	ENSG00000091651.7	ENSG00000104903.4		ENSG00000224427.1		ENSG00000213424.7	ENSG00000167967.14		ENSG00000145494.10			ENSG00000077157.19	ENSG00000186166.7
ENSG00000232216.1	ENSG00000092853.12	ENSG00000104921.13		ENSG00000224631.4		ENSG00000249751.3	ENSG00000168061.12		ENSG00000145592.12			ENSG00000077522.11	ENSG00000188185.10
ENSG00000233999.3	ENSG00000093009.8	ENSG00000104951.14		ENSG00000224773.2		ENSG00000261371.4	ENSG00000169683.6		ENSG00000145741.14			ENSG00000077782.18	ENSG00000188206.6
ENSG00000239571.1	ENSG00000094804.8	ENSG00000104972.13		ENSG00000224839.1		ENSG00000267045.1	ENSG00000169710.6		ENSG00000145982.10			ENSG00000077943.7	ENSG00000188234.12
ENSG00000239819.2	ENSG00000095002.11	ENSG00000105122.11		ENSG00000224858.5		ENSG00000267107.5	ENSG00000169718.16		ENSG00000147403.15			ENSG00000078018.18	ENSG00000196295.10
ENSG00000239855.1	ENSG00000096063.13	ENSG00000105246.5		ENSG00000224993.3		ENSG00000267472.1	ENSG00000170604.4		ENSG00000147604.12			ENSG00000078053.15	ENSG00000196696.11
ENSG00000239951.1	ENSG00000097046.11	ENSG00000105369.8		ENSG00000225022.1			ENSG00000172534.12		ENSG00000147677.9			ENSG00000078295.14	ENSG00000197162.9
ENSG00000239975.2	ENSG00000099622.12	ENSG00000105374.8		ENSG00000225031.1			ENSG00000175467.13		ENSG00000148303.15			ENSG00000078549.13	ENSG00000198356.10
ENSG00000240382.3	ENSG00000099783.10	ENSG00000105483.15		ENSG00000225093.1			ENSG00000175931.11		ENSG00000149273.13			ENSG00000078804.11	ENSG00000198556.12
ENSG00000240671.2	ENSG00000099901.15	ENSG00000105639.17		ENSG00000225137.1			ENSG00000176182.5		ENSG00000149806.9			ENSG00000079102.15	ENSG00000198563.12
ENSG00000240864.3	ENSG00000100162.13	ENSG00000105851.9		ENSG00000225159.1			ENSG00000176619.9		ENSG00000151131.8			ENSG00000079308.15	ENSG00000198590.10
ENSG00000241244.1	ENSG00000100372.13	ENSG00000105967.14		ENSG00000225616.2			ENSG00000177728.13		ENSG00000151353.13			ENSG00000079841.17	ENSG00000198625.11
ENSG00000241294.1	ENSG00000100462.14	ENSG00000106560.9		ENSG00000226221.1			ENSG00000179115.9		ENSG00000154518.8			ENSG00000080166.14	ENSG00000202441.2
ENSG00000241351.2	ENSG00000100478.13	ENSG00000106948.15		ENSG00000226360.5			ENSG00000179134.13		ENSG00000156411.8			ENSG00000080224.16	ENSG00000203286.5
ENSG00000241566.1	ENSG00000100479.11	ENSG00000106952.6		ENSG00000226415.1			ENSG00000179943.7		ENSG00000156482.9			ENSG00000080561.12	ENSG00000203761.5
ENSG00000241755.1	ENSG00000100526.18	ENSG00000107099.14		ENSG00000226525.5			ENSG00000180035.9		ENSG00000156508.16			ENSG00000080644.14	ENSG00000203872.6
ENSG00000242076.2	ENSG00000100714.14	ENSG00000107317.10		ENSG00000226540.2			ENSG00000181027.9		ENSG00000159199.12			ENSG00000080854.13	ENSG00000204149.8
ENSG00000242371.1	ENSG00000100749.6	ENSG00000107485.14		ENSG00000226624.1			ENSG00000182872.14		ENSG00000161016.14			ENSG00000081818.3	ENSG00000204172.10
ENSG00000242534.2	ENSG00000100983.8	ENSG00000107742.11		ENSG00000226642.1			ENSG00000183751.13		ENSG00000161970.11			ENSG00000082175.13	ENSG00000204410.13
ENSG00000242580.1	ENSG00000100991.10	ENSG00000108669.15		ENSG00000226945.1			ENSG00000184967.5		ENSG00000162244.9			ENSG00000082293.11	ENSG00000205085.7
ENSG00000242766.1	ENSG00000100997.17	ENSG00000108798.7		ENSG00000226948.1			ENSG00000185024.14		ENSG00000163170.10			ENSG00000082497.10	ENSG00000205485.12
ENSG00000242887.1	ENSG00000101003.9	ENSG00000109079.8		ENSG00000227008.2			ENSG00000185359.11		ENSG00000163541.10			ENSG00000083290.18	ENSG00000205790.1
ENSG00000243063.1	ENSG00000101019.20	ENSG00000109684.13		ENSG00000227304.3			ENSG00000185800.10		ENSG00000163682.14			ENSG00000087258.12	ENSG00000206149.9
ENSG00000243238.1	ENSG00000101057.14	ENSG00000109943.7		ENSG00000227376.1			ENSG00000188566.10		ENSG00000164405.9			ENSG00000087274.15	ENSG00000206530.7
ENSG00000243264.2	ENSG00000101076.15	ENSG00000110031.11		ENSG00000227694.1			ENSG00000188807.11		ENSG00000164587.10			ENSG00000087448.8	ENSG00000207234.1
ENSG00000243290.1	ENSG00000101079.19	ENSG00000110077.13		ENSG00000227765.4			ENSG00000196235.12		ENSG00000165264.9			ENSG00000087903.11	ENSG00000207554.1
ENSG00000243466.1	ENSG00000101084.15	ENSG00000110324.8		ENSG00000227939.1			ENSG00000196313.10		ENSG00000165502.6			ENSG00000088035.14	ENSG00000212694.7
ENSG00000244116.3	ENSG00000101138.10	ENSG00000110446.8		ENSG00000228205.1			ENSG00000196365.10		ENSG00000166441.11			ENSG00000088538.12	ENSG00000213139.6
ENSG00000244437.1	ENSG00000101146.11	ENSG00000110448.9		ENSG00000228232.1			ENSG00000196961.11		ENSG00000166595.10			ENSG00000088543.13	ENSG00000213782.6
ENSG00000244575.3	ENSG00000101158.11	ENSG00000110777.10		ENSG00000228328.2			ENSG00000197136.4		ENSG00000167272.9			ENSG00000088854.12	ENSG00000214021.14
ENSG00000249096.5	ENSG00000101182.13	ENSG00000110848.7		ENSG00000228399.1			ENSG00000197483.9		ENSG00000167526.12			ENSG00000088881.19	ENSG00000214331.7
ENSG00000251039.2	ENSG00000101189.6	ENSG00000110876.9		ENSG00000228499.1			ENSG00000197785.12		ENSG00000167862.8			ENSG00000089250.17	ENSG00000215252.10
ENSG00000251546.1	ENSG00000101255.9	ENSG00000110934.9		ENSG00000228501.2			ENSG00000204394.11		ENSG00000167863.10			ENSG00000090530.8	ENSG00000215769.7
ENSG00000253120.1	ENSG00000101266.15	ENSG00000111348.7		ENSG00000228502.1			ENSG00000204439.3		ENSG00000168028.12			ENSG00000091436.15	ENSG00000215788.8
ENSG00000253131.1	ENSG00000101294.15	ENSG00000111537.4		ENSG00000228930.1			ENSG00000204469.11		ENSG00000169100.11			ENSG00000091482.5	ENSG00000215908.6
ENSG00000253132.1	ENSG00000101310.13	ENSG00000111679.15		ENSG00000229022.1			ENSG00000218891.4		ENSG00000169689.13			ENSG00000091622.14	ENSG00000220785.6
ENSG00000253234.1	ENSG00000101337.14	ENSG00000111796.3		ENSG00000229132.2			ENSG00000227057.6		ENSG00000169976.6			ENSG00000091986.14	ENSG00000221978.10
ENSG00000253274.1	ENSG00000101361.13	ENSG00000111913.14		ENSG00000229145.1			ENSG00000239306.4		ENSG00000170889.12			ENSG00000092096.13	ENSG00000222937.1
ENSG00000253497.1	ENSG00000101391.19	ENSG00000112149.8		ENSG00000229349.2			ENSG00000261221.3		ENSG00000171311.11			ENSG00000092841.17	ENSG00000223374.1
ENSG00000253545.1	ENSG00000101407.11	ENSG00000112182.13		ENSG00000229638.1			ENSG00000261236.4		ENSG00000171425.8			ENSG00000095303.13	ENSG00000223473.2
ENSG00000253691.2	ENSG00000101412.12	ENSG00000112303.12		ENSG00000229806.1			ENSG00000272333.4		ENSG00000171858.16			ENSG00000095637.19	ENSG00000223509.7
ENSG00000253709.1	ENSG00000101413.10	ENSG00000112799.7		ENSG00000229985.2					ENSG00000171863.11			ENSG00000097007.16	ENSG00000223692.1
ENSG00000253742.1	ENSG00000101444.11	ENSG00000113088.5		ENSG00000230080.2					ENSG00000172428.9			ENSG00000097096.8	ENSG00000223705.8
ENSG00000253755.1	ENSG00000101464.9	ENSG00000113263.11		ENSG00000230199.1					ENSG00000172586.7			ENSG00000099889.12	ENSG00000223745.6
ENSG00000253883.1	ENSG00000101474.10	ENSG00000113302.4		ENSG00000230207.1					ENSG00000172590.17			ENSG00000100027.13	ENSG00000223959.7
ENSG00000254056.1	ENSG00000101811.12	ENSG00000113532.11		ENSG00000230291.5					ENSG00000172809.11			ENSG00000100139.12	ENSG00000224660.1
ENSG00000254174.1	ENSG00000101945.15	ENSG00000115085.12		ENSG00000230364.1					ENSG00000173141.4			ENSG00000100154.13	ENSG00000224975.1
ENSG00000254395.1	ENSG00000102100.13	ENSG00000115165.8		ENSG00000230383.1					ENSG00000173660.10			ENSG00000100181.20	ENSG00000225447.1
ENSG00000254709.5	ENSG00000102225.14	ENSG00000115232.12		ENSG00000230507.5					ENSG00000174444.13			ENSG00000100302.6	ENSG00000225828.1
ENSG00000259261.2	ENSG00000102384.12	ENSG00000115607.8		ENSG00000230508.1					ENSG00000174547.12			ENSG00000100307.11	ENSG00000225892.3
ENSG00000259337.4	ENSG00000103356.14	ENSG00000115935.15		ENSG00000230580.1					ENSG00000174748.17			ENSG00000100320.21	ENSG00000225920.2
ENSG00000259490.2	ENSG00000104147.7	ENSG00000115956.9		ENSG00000230581.2					ENSG00000175390.11			ENSG00000100321.13	ENSG00000226029.1
ENSG00000259680.5	ENSG00000104356.9	ENSG00000116147.15		ENSG00000230721.1					ENSG00000176731.10			ENSG00000100399.14	ENSG00000226167.1
ENSG00000270318.1	ENSG00000104549.10	ENSG00000116824.4		ENSG00000230829.3					ENSG00000177410.11			ENSG00000100592.14	ENSG00000226312.6
ENSG00000270472.2	ENSG00000104738.15	ENSG00000117009.10		ENSG00000230897.1					ENSG00000177600.7			ENSG00000100626.15	ENSG00000226450.2
ENSG00000270550.1	ENSG00000104824.15	ENSG00000117090.13		ENSG00000231120.3					ENSG00000178035.10			ENSG00000100628.10	ENSG00000226696.4
ENSG00000270864.1	ENSG00000104889.4	ENSG00000117091.8		ENSG00000231167.3					ENSG00000178057.13			ENSG00000100842.11	ENSG00000226763.4
ENSG00000271130.1	ENSG00000105011.7	ENSG00000117215.13		ENSG00000231234.2					ENSG00000178741.10			ENSG00000100968.12	ENSG00000226849.1
ENSG00000271178.1	ENSG00000105173.12	ENSG00000117322.15		ENSG00000231369.1					ENSG00000178982.8			ENSG00000101160.12	ENSG00000227388.2
ENSG00000271375.1	ENSG00000105197.9	ENSG00000117560.7		ENSG00000231991.4					ENSG00000182117.5			ENSG00000101230.5	ENSG00000227671.4
ENSG00000271569.1	ENSG00000105202.6	ENSG00000118308.13		ENSG00000232037.3					ENSG00000182512.4			ENSG00000101290.12	ENSG00000227782.2
ENSG00000276566.1	ENSG00000105281.11	ENSG00000120280.5		ENSG00000232172.1					ENSG00000182774.9			ENSG00000101335.8	ENSG00000228107.1
ENSG00000277282.1	ENSG00000105341.17	ENSG00000120899.16		ENSG00000232176.1					ENSG00000182899.13			ENSG00000101605.11	ENSG00000228242.5
ENSG00000278196.1	ENSG00000105438.7	ENSG00000121210.14		ENSG00000232346.1					ENSG00000184076.12			ENSG00000101938.13	ENSG00000228327.2
ENSG00000278263.2	ENSG00000105447.11	ENSG00000121594.10		ENSG00000232472.1					ENSG00000184752.11			ENSG00000101955.13	ENSG00000228409.4
ENSG00000278473.1	ENSG00000105486.12	ENSG00000121807.5		ENSG00000232496.2					ENSG00000184924.5			ENSG00000102057.8	ENSG00000229127.1
ENSG00000278857.1	ENSG00000105499.12	ENSG00000121895.7		ENSG00000232587.1					ENSG00000185608.7			ENSG00000102271.12	ENSG00000229152.2
ENSG00000280411.1	ENSG00000105552.13	ENSG00000121966.6		ENSG00000232883.1					ENSG00000186184.14			ENSG00000102349.13	ENSG00000229180.5
	ENSG00000105568.16	ENSG00000122025.13		ENSG00000233057.1					ENSG00000186468.11			ENSG00000102383.12	ENSG00000229413.2
	ENSG00000105618.12	ENSG00000122122.9		ENSG00000233380.1					ENSG00000187514.13			ENSG00000102409.9	ENSG00000229519.2
	ENSG00000105722.8	ENSG00000122188.11		ENSG00000233406.5					ENSG00000188243.11			ENSG00000102539.5	ENSG00000229677.1
	ENSG00000105784.14	ENSG00000122223.11		ENSG00000233426.3					ENSG00000188846.12			ENSG00000102547.17	ENSG00000229820.2
	ENSG00000106105.12	ENSG00000122224.16		ENSG00000233594.2					ENSG00000189343.7			ENSG00000102781.12	ENSG00000230224.1
	ENSG00000106397.10	ENSG00000122862.4		ENSG00000233762.3					ENSG00000196531.9			ENSG00000102935.10	ENSG00000230295.1
	ENSG00000106462.9	ENSG00000122986.12		ENSG00000233859.2					ENSG00000196683.9			ENSG00000103175.9	ENSG00000230551.4
	ENSG00000106628.9	ENSG00000123329.16		ENSG00000233994.2					ENSG00000197111.14			ENSG00000103196.10	ENSG00000230715.3
	ENSG00000106636.6	ENSG00000123338.11		ENSG00000234017.1					ENSG00000197714.7			ENSG00000103241.6	ENSG00000230732.4
	ENSG00000106638.14	ENSG00000124126.12		ENSG00000234080.3					ENSG00000197756.8			ENSG00000103264.14	ENSG00000230872.1
	ENSG00000107937.17	ENSG00000124203.5		ENSG00000234106.3					ENSG00000197958.11			ENSG00000103852.11	ENSG00000231125.2
	ENSG00000108064.9	ENSG00000124214.18		ENSG00000234118.1					ENSG00000198034.9			ENSG00000104332.10	ENSG00000231587.1
	ENSG00000108106.12	ENSG00000124256.13		ENSG00000234176.1					ENSG00000198242.12			ENSG00000104447.10	ENSG00000231731.6
	ENSG00000108179.12	ENSG00000124334.15		ENSG00000234488.1					ENSG00000198755.9			ENSG00000104490.16	ENSG00000232372.1
	ENSG00000108671.8	ENSG00000124772.10		ENSG00000234589.4					ENSG00000198931.9			ENSG00000104722.12	ENSG00000232546.1
	ENSG00000108773.9	ENSG00000125245.11		ENSG00000234782.3					ENSG00000204628.10			ENSG00000104723.19	ENSG00000232630.1
	ENSG00000108829.9	ENSG00000125735.9		ENSG00000234785.1					ENSG00000205544.3			ENSG00000104936.16	ENSG00000232931.4
	ENSG00000108883.11	ENSG00000125910.5		ENSG00000234797.5					ENSG00000213619.8			ENSG00000105137.11	ENSG00000233025.1
	ENSG00000109084.12	ENSG00000126246.8		ENSG00000234981.1					ENSG00000213741.7			ENSG00000105270.13	ENSG00000233122.2
	ENSG00000109606.11	ENSG00000126264.8		ENSG00000234982.1					ENSG00000214113.9			ENSG00000105426.13	ENSG00000233231.1
	ENSG00000109674.3	ENSG00000126353.3		ENSG00000235001.3					ENSG00000215021.7			ENSG00000105696.7	ENSG00000233885.6
	ENSG00000109805.8	ENSG00000126759.11		ENSG00000235043.3					ENSG00000221983.6			ENSG00000105737.8	ENSG00000234222.5
	ENSG00000110074.9	ENSG00000126860.10		ENSG00000235225.1					ENSG00000229994.1			ENSG00000105894.10	ENSG00000234420.6
	ENSG00000110104.10	ENSG00000126882.11		ENSG00000235297.3					ENSG00000231500.5			ENSG00000105974.10	ENSG00000234500.1
	ENSG00000110583.11	ENSG00000127084.16		ENSG00000235552.4					ENSG00000232112.3			ENSG00000105996.6	ENSG00000234585.5
	ENSG00000110921.10	ENSG00000128218.7		ENSG00000235587.2					ENSG00000233927.4			ENSG00000106018.12	ENSG00000235016.1
	ENSG00000111206.11	ENSG00000128284.18		ENSG00000235644.1					ENSG00000234741.6			ENSG00000106034.16	ENSG00000235245.1
	ENSG00000111247.13	ENSG00000128340.13		ENSG00000236111.5					ENSG00000237039.1			ENSG00000106511.5	ENSG00000235298.1
	ENSG00000111445.12	ENSG00000128438.9		ENSG00000236148.5					ENSG00000241343.8			ENSG00000106571.11	ENSG00000235351.1
	ENSG00000111581.8	ENSG00000128815.16		ENSG00000236297.1					ENSG00000241468.6			ENSG00000106771.11	ENSG00000235908.1
	ENSG00000111602.10	ENSG00000129993.13		ENSG00000236330.1					ENSG00000256393.1			ENSG00000106772.16	ENSG00000236383.6
	ENSG00000111665.10	ENSG00000130487.5		ENSG00000236468.1					ENSG00000279483.1			ENSG00000106809.9	ENSG00000237025.1
	ENSG00000111728.9	ENSG00000130592.12		ENSG00000236480.1								ENSG00000106829.17	ENSG00000237491.7
	ENSG00000112029.8	ENSG00000130755.11		ENSG00000236533.1								ENSG00000107130.8	ENSG00000237672.1
	ENSG00000112039.3	ENSG00000130775.14		ENSG00000236552.2								ENSG00000107186.15	ENSG00000237718.2
	ENSG00000112118.16	ENSG00000131401.10		ENSG00000236603.2								ENSG00000107518.15	ENSG00000237903.1
	ENSG00000112242.13	ENSG00000132185.15		ENSG00000236735.3								ENSG00000107771.14	ENSG00000237938.4
	ENSG00000112312.8	ENSG00000132274.14		ENSG00000236762.1								ENSG00000107779.10	ENSG00000238198.1
	ENSG00000112473.15	ENSG00000132514.12		ENSG00000236773.1								ENSG00000107796.11	ENSG00000239272.1
	ENSG00000112578.8	ENSG00000132704.14		ENSG00000236801.1								ENSG00000107816.16	ENSG00000239291.1
	ENSG00000112742.8	ENSG00000133246.10		ENSG00000236887.1								ENSG00000108001.12	ENSG00000239300.4
	ENSG00000112984.10	ENSG00000133574.8		ENSG00000236992.2								ENSG00000108018.14	ENSG00000239486.1
	ENSG00000113161.14	ENSG00000133639.4		ENSG00000236993.2								ENSG00000108231.10	ENSG00000239763.2
	ENSG00000113360.15	ENSG00000134061.5		ENSG00000237214.3								ENSG00000108381.9	ENSG00000239883.7
	ENSG00000113368.10	ENSG00000134242.14		ENSG00000237709.1								ENSG00000108509.19	ENSG00000240038.5
	ENSG00000113407.12	ENSG00000134460.14		ENSG00000237757.2								ENSG00000108797.10	ENSG00000240053.8
	ENSG00000113552.14	ENSG00000134516.14		ENSG00000237793.3								ENSG00000108799.11	ENSG00000240288.6
	ENSG00000113569.14	ENSG00000134545.12		ENSG00000237888.1								ENSG00000108823.14	ENSG00000240970.1
	ENSG00000113810.14	ENSG00000134594.4		ENSG00000237999.2								ENSG00000108830.9	ENSG00000241404.5
	ENSG00000114346.12	ENSG00000134954.13		ENSG00000238150.1								ENSG00000108852.13	ENSG00000242294.5
	ENSG00000114491.12	ENSG00000135426.13		ENSG00000239198.1								ENSG00000108861.7	ENSG00000242338.5
	ENSG00000114686.7	ENSG00000135439.10		ENSG00000239246.3								ENSG00000108924.12	ENSG00000242588.5
	ENSG00000114993.14	ENSG00000135604.9		ENSG00000239344.1								ENSG00000109339.17	ENSG00000243302.3
	ENSG00000115053.14	ENSG00000135899.15		ENSG00000239809.1								ENSG00000109458.7	ENSG00000243679.1
	ENSG00000115163.13	ENSG00000135905.17		ENSG00000240036.4								ENSG00000109501.12	ENSG00000243696.4
	ENSG00000115207.12	ENSG00000136167.12		ENSG00000240096.1								ENSG00000109610.5	ENSG00000243716.9
	ENSG00000115275.10	ENSG00000136250.10		ENSG00000240311.1								ENSG00000109686.15	ENSG00000244560.5
	ENSG00000115806.11	ENSG00000136286.13		ENSG00000240371.1								ENSG00000109738.9	ENSG00000244723.3
	ENSG00000116133.10	ENSG00000136404.14		ENSG00000240376.1								ENSG00000109790.15	ENSG00000244754.7
	ENSG00000116161.16	ENSG00000136490.7		ENSG00000240395.1								ENSG00000109794.12	ENSG00000244879.4
	ENSG00000116455.12	ENSG00000136573.11		ENSG00000240509.1								ENSG00000109846.6	ENSG00000244932.2
	ENSG00000116478.10	ENSG00000137078.7		ENSG00000240540.2								ENSG00000109861.14	ENSG00000245849.5
	ENSG00000116560.9	ENSG00000137101.11		ENSG00000240622.1								ENSG00000109906.12	ENSG00000246451.2
	ENSG00000116698.19	ENSG00000137265.13		ENSG00000240776.1								ENSG00000110237.3	ENSG00000246922.7
	ENSG00000117222.12	ENSG00000137491.13		ENSG00000240898.1								ENSG00000110906.11	ENSG00000248019.2
	ENSG00000117399.12	ENSG00000137496.16		ENSG00000240914.1								ENSG00000110975.7	ENSG00000248124.6
	ENSG00000117593.9	ENSG00000137841.10		ENSG00000240950.1								ENSG00000111077.16	ENSG00000250251.5
	ENSG00000117597.16	ENSG00000138378.16		ENSG00000241061.3								ENSG00000111262.4	ENSG00000250404.1
	ENSG00000117632.19	ENSG00000138964.15		ENSG00000241352.3								ENSG00000111341.8	ENSG00000250506.5
	ENSG00000117650.11	ENSG00000139187.8		ENSG00000241429.1								ENSG00000111452.11	ENSG00000251229.1
	ENSG00000117724.11	ENSG00000139190.15		ENSG00000241478.1								ENSG00000111676.13	ENSG00000251414.1
	ENSG00000117877.9	ENSG00000139193.3		ENSG00000241511.1								ENSG00000111727.10	ENSG00000251474.5
	ENSG00000118162.12	ENSG00000139194.6		ENSG00000241741.1								ENSG00000111752.9	ENSG00000252361.1
	ENSG00000118193.10	ENSG00000139597.15		ENSG00000241746.1								ENSG00000111786.7	ENSG00000254428.1
	ENSG00000118705.15	ENSG00000139626.14		ENSG00000242071.3								ENSG00000112183.13	ENSG00000254463.1
	ENSG00000119203.12	ENSG00000140009.17		ENSG00000242088.1								ENSG00000112186.10	ENSG00000254691.1
	ENSG00000119285.9	ENSG00000140030.5		ENSG00000242169.2								ENSG00000112208.11	ENSG00000254909.1
	ENSG00000119335.15	ENSG00000140104.12		ENSG00000242208.1								ENSG00000112210.10	ENSG00000254995.4
	ENSG00000119392.13	ENSG00000140368.11		ENSG00000242262.1								ENSG00000112276.12	ENSG00000255142.1
	ENSG00000119682.15	ENSG00000140379.7		ENSG00000242276.2								ENSG00000112320.10	ENSG00000255837.1
	ENSG00000119969.13	ENSG00000140678.15		ENSG00000242299.1								ENSG00000112425.12	ENSG00000256667.5
	ENSG00000120254.14	ENSG00000140749.8		ENSG00000242411.2								ENSG00000112562.17	ENSG00000257246.1
	ENSG00000120334.14	ENSG00000141293.14		ENSG00000242445.1								ENSG00000112658.7	ENSG00000257270.1
	ENSG00000120526.9	ENSG00000141506.12		ENSG00000242477.1								ENSG00000112769.17	ENSG00000257354.2
	ENSG00000120539.13	ENSG00000141968.6		ENSG00000242667.1								ENSG00000112936.17	ENSG00000257509.1
	ENSG00000120685.18	ENSG00000142347.15		ENSG00000242697.2								ENSG00000112964.12	ENSG00000257621.6
	ENSG00000120694.18	ENSG00000142512.13		ENSG00000242747.1								ENSG00000113231.12	ENSG00000258057.4
	ENSG00000120802.12	ENSG00000143110.10		ENSG00000242814.2								ENSG00000113391.15	ENSG00000258461.4
	ENSG00000121058.4	ENSG00000143119.11		ENSG00000242858.1								ENSG00000113448.15	ENSG00000258559.2
	ENSG00000121073.12	ENSG00000143185.3		ENSG00000242882.1								ENSG00000113657.11	ENSG00000258682.1
	ENSG00000121152.8	ENSG00000143297.17		ENSG00000242952.1								ENSG00000114126.16	ENSG00000258727.1
	ENSG00000121211.6	ENSG00000143851.14		ENSG00000242960.1								ENSG00000114790.11	ENSG00000259287.2
	ENSG00000121621.6	ENSG00000145088.7		ENSG00000242992.3								ENSG00000114853.12	ENSG00000259298.1
	ENSG00000121774.16	ENSG00000145416.12		ENSG00000243014.1								ENSG00000114861.17	ENSG00000259318.1
	ENSG00000122565.17	ENSG00000145649.7		ENSG00000243256.1								ENSG00000115041.11	ENSG00000259408.2
	ENSG00000122566.19	ENSG00000145779.7		ENSG00000243388.1								ENSG00000115183.12	ENSG00000259488.2
	ENSG00000122687.16	ENSG00000145850.7		ENSG00000243445.1								ENSG00000115252.17	ENSG00000259515.1
	ENSG00000122952.15	ENSG00000146094.12		ENSG00000243455.3								ENSG00000115295.18	ENSG00000259556.2
	ENSG00000122966.12	ENSG00000146192.13		ENSG00000243498.2								ENSG00000115380.17	ENSG00000259921.1
	ENSG00000123136.13	ENSG00000146285.12		ENSG00000243517.1								ENSG00000115468.10	ENSG00000259972.2
	ENSG00000123213.21	ENSG00000146433.8		ENSG00000243663.1								ENSG00000115556.12	ENSG00000260114.2
	ENSG00000123219.11	ENSG00000147138.1		ENSG00000243746.1								ENSG00000115593.13	ENSG00000260121.1
	ENSG00000123374.9	ENSG00000147443.11		ENSG00000243829.1								ENSG00000115665.7	ENSG00000260404.2
	ENSG00000123473.14	ENSG00000149781.11		ENSG00000243830.2								ENSG00000115705.19	ENSG00000260565.5
	ENSG00000123485.10	ENSG00000150637.7		ENSG00000243904.1								ENSG00000115840.12	ENSG00000260618.1
	ENSG00000123505.13	ENSG00000150681.8		ENSG00000244052.1								ENSG00000115841.18	ENSG00000260751.2
	ENSG00000123975.4	ENSG00000151702.15		ENSG00000244192.1								ENSG00000115896.14	ENSG00000260773.1
	ENSG00000124155.15	ENSG00000152213.3		ENSG00000244313.3								ENSG00000116141.14	ENSG00000260808.1
	ENSG00000124207.15	ENSG00000152315.4		ENSG00000244331.1								ENSG00000116194.11	ENSG00000260884.1
	ENSG00000124228.13	ENSG00000152495.9		ENSG00000244363.3								ENSG00000116254.16	ENSG00000260942.1
	ENSG00000124279.10	ENSG00000152969.15		ENSG00000244538.1								ENSG00000116473.13	ENSG00000261094.2
	ENSG00000124541.6	ENSG00000153064.10		ENSG00000244722.1								ENSG00000116604.16	ENSG00000261326.2
	ENSG00000124571.16	ENSG00000153283.11		ENSG00000245205.3								ENSG00000116667.11	ENSG00000261366.1
	ENSG00000124789.10	ENSG00000153563.14		ENSG00000248180.1								ENSG00000116678.17	ENSG00000261408.4
	ENSG00000125122.13	ENSG00000154016.12		ENSG00000248415.1								ENSG00000116729.12	ENSG00000261474.1
	ENSG00000125319.13	ENSG00000154025.14		ENSG00000248626.1								ENSG00000116774.10	ENSG00000261490.1
	ENSG00000125450.9	ENSG00000154451.13		ENSG00000249210.1								ENSG00000116871.14	ENSG00000261505.1
	ENSG00000125454.10	ENSG00000155307.16		ENSG00000249264.1								ENSG00000117013.13	ENSG00000261556.7
	ENSG00000125630.14	ENSG00000155849.14		ENSG00000249353.2								ENSG00000117016.8	ENSG00000261560.1
	ENSG00000125755.17	ENSG00000155926.12		ENSG00000249489.1								ENSG00000117020.15	ENSG00000261732.1
	ENSG00000125834.11	ENSG00000155961.4		ENSG00000249774.1								ENSG00000117569.17	ENSG00000261884.2
	ENSG00000125835.16	ENSG00000156234.7		ENSG00000249855.1								ENSG00000117640.16	ENSG00000262580.4
	ENSG00000125885.12	ENSG00000156299.11		ENSG00000249921.2								ENSG00000117643.13	ENSG00000262903.1
	ENSG00000125944.17	ENSG00000156738.16		ENSG00000250144.1								ENSG00000117971.10	ENSG00000263126.1
	ENSG00000125970.10	ENSG00000157303.9		ENSG00000250182.3								ENSG00000118160.12	ENSG00000263272.1
	ENSG00000125991.17	ENSG00000157734.12		ENSG00000250982.2								ENSG00000118257.15	ENSG00000263276.1
	ENSG00000126261.11	ENSG00000158470.5		ENSG00000253785.1								ENSG00000118407.13	ENSG00000263345.1
	ENSG00000126453.8	ENSG00000158473.6		ENSG00000254759.1								ENSG00000118432.12	ENSG00000263956.4
	ENSG00000126457.19	ENSG00000158481.11		ENSG00000254893.4								ENSG00000118496.4	ENSG00000263990.1
	ENSG00000126787.11	ENSG00000158488.14		ENSG00000255350.1								ENSG00000118729.11	ENSG00000264538.5
	ENSG00000127423.9	ENSG00000158517.12		ENSG00000256356.1								ENSG00000118762.6	ENSG00000265205.1
	ENSG00000127564.15	ENSG00000158717.9		ENSG00000256745.1								ENSG00000119138.4	ENSG00000265791.1
	ENSG00000127586.15	ENSG00000159496.13		ENSG00000257907.2								ENSG00000119147.8	ENSG00000265996.1
	ENSG00000127831.9	ENSG00000159618.14		ENSG00000258501.1								ENSG00000119729.9	ENSG00000266490.1
	ENSG00000128050.7	ENSG00000159753.12		ENSG00000258841.1								ENSG00000119801.11	ENSG00000266717.1
	ENSG00000128059.7	ENSG00000159958.4		ENSG00000258846.1								ENSG00000119865.7	ENSG00000266777.1
	ENSG00000128944.12	ENSG00000160185.12		ENSG00000259020.3								ENSG00000119938.8	ENSG00000266993.3
	ENSG00000129173.11	ENSG00000160219.10		ENSG00000259394.2								ENSG00000119950.19	ENSG00000267163.1
	ENSG00000129195.14	ENSG00000160255.15		ENSG00000259612.1								ENSG00000120051.13	ENSG00000267244.4
	ENSG00000129810.13	ENSG00000160593.16		ENSG00000260490.2								ENSG00000120324.6	ENSG00000267278.4
	ENSG00000130202.8	ENSG00000160654.8		ENSG00000260521.2								ENSG00000120658.11	ENSG00000267281.2
	ENSG00000130204.11	ENSG00000160683.4		ENSG00000261557.1								ENSG00000120693.12	ENSG00000267632.1
	ENSG00000130518.15	ENSG00000160791.13		ENSG00000263232.2								ENSG00000120729.8	ENSG00000267680.4
	ENSG00000130669.16	ENSG00000160856.19		ENSG00000263563.4								ENSG00000121005.7	ENSG00000267838.2
	ENSG00000130695.12	ENSG00000161265.13		ENSG00000264281.3								ENSG00000121236.18	ENSG00000267871.4
	ENSG00000130725.6	ENSG00000161270.18		ENSG00000264316.1								ENSG00000121297.6	ENSG00000267896.1
	ENSG00000130726.10	ENSG00000161405.15		ENSG00000266920.1								ENSG00000121413.11	ENSG00000268030.1
	ENSG00000130816.13	ENSG00000161791.12		ENSG00000267669.1								ENSG00000121440.13	ENSG00000268043.6
	ENSG00000130826.14	ENSG00000161911.10		ENSG00000267809.1								ENSG00000121577.12	ENSG00000268189.2
	ENSG00000130935.8	ENSG00000161929.13		ENSG00000268222.1								ENSG00000121871.3	ENSG00000268205.1
	ENSG00000131153.7	ENSG00000162511.7		ENSG00000277447.1								ENSG00000121898.11	ENSG00000268218.1
	ENSG00000131351.13	ENSG00000162676.10		ENSG00000277998.1								ENSG00000122012.12	ENSG00000268520.1
	ENSG00000131462.6	ENSG00000162739.12		ENSG00000279392.1								ENSG00000122367.18	ENSG00000268970.1
	ENSG00000131467.9	ENSG00000162777.15		ENSG00000279865.1								ENSG00000122420.8	ENSG00000269352.1
	ENSG00000131475.5	ENSG00000162892.14										ENSG00000122585.6	ENSG00000269481.1
	ENSG00000131652.12	ENSG00000162894.10										ENSG00000122707.10	ENSG00000270015.1
	ENSG00000131747.13	ENSG00000162897.13										ENSG00000122733.12	ENSG00000270060.1
	ENSG00000131876.15	ENSG00000163154.5										ENSG00000122786.18	ENSG00000270108.1
	ENSG00000132305.19	ENSG00000163219.10										ENSG00000122824.9	ENSG00000270189.1
	ENSG00000132341.10	ENSG00000163273.3										ENSG00000122863.5	ENSG00000270231.3
	ENSG00000132436.10	ENSG00000163376.10										ENSG00000123091.4	ENSG00000270392.2
	ENSG00000132623.14	ENSG00000163508.11										ENSG00000123094.14	ENSG00000270427.1
	ENSG00000132646.9	ENSG00000163518.9										ENSG00000123096.10	ENSG00000270589.1
	ENSG00000132768.12	ENSG00000163519.12										ENSG00000123119.10	ENSG00000270804.1
	ENSG00000132780.15	ENSG00000163534.13										ENSG00000123243.13	ENSG00000270871.1
	ENSG00000133119.11	ENSG00000163564.13										ENSG00000123560.12	ENSG00000271383.5
	ENSG00000133265.9	ENSG00000163568.12										ENSG00000123570.3	ENSG00000271430.1
	ENSG00000133657.13	ENSG00000163600.11										ENSG00000124067.15	ENSG00000271533.1
	ENSG00000133895.13	ENSG00000163606.9										ENSG00000124104.17	ENSG00000271554.1
	ENSG00000134057.13	ENSG00000164236.10										ENSG00000124212.5	ENSG00000271664.1
	ENSG00000134222.15	ENSG00000164512.16										ENSG00000124942.12	ENSG00000271816.1
	ENSG00000134684.9	ENSG00000164674.14										ENSG00000125503.11	ENSG00000271825.1
	ENSG00000134690.9	ENSG00000164691.15										ENSG00000125648.13	ENSG00000271895.2
	ENSG00000134697.11	ENSG00000165168.7										ENSG00000125868.14	ENSG00000271997.1
	ENSG00000134815.17	ENSG00000165178.9										ENSG00000125965.7	ENSG00000272054.1
	ENSG00000134900.10	ENSG00000165409.14										ENSG00000126010.5	ENSG00000272145.1
	ENSG00000134910.11	ENSG00000166428.11										ENSG00000126091.18	ENSG00000272153.1
	ENSG00000135069.12	ENSG00000166676.13										ENSG00000126500.3	ENSG00000272356.1
	ENSG00000135100.16	ENSG00000166707.9										ENSG00000126705.12	ENSG00000272367.1
	ENSG00000135451.11	ENSG00000166927.11										ENSG00000126785.11	ENSG00000272578.4
	ENSG00000135476.10	ENSG00000167077.11										ENSG00000126803.9	ENSG00000272588.1
	ENSG00000135506.14	ENSG00000167083.5										ENSG00000126947.10	ENSG00000272645.2
	ENSG00000135525.17	ENSG00000167208.13										ENSG00000126950.7	ENSG00000272669.1
	ENSG00000135763.8	ENSG00000167261.12										ENSG00000127083.7	ENSG00000272752.4
	ENSG00000135829.15	ENSG00000167286.8										ENSG00000127603.22	ENSG00000272807.1
	ENSG00000135912.9	ENSG00000167483.16										ENSG00000127743.5	ENSG00000272836.1
	ENSG00000136108.13	ENSG00000167604.12										ENSG00000127903.13	ENSG00000272849.1
	ENSG00000136122.14	ENSG00000167613.14										ENSG00000127920.5	ENSG00000272918.1
	ENSG00000136240.8	ENSG00000167664.7										ENSG00000128266.8	ENSG00000273000.4
	ENSG00000136261.13	ENSG00000167895.13										ENSG00000128346.9	ENSG00000273017.1
	ENSG00000136270.12	ENSG00000167984.15										ENSG00000128482.14	ENSG00000273137.1
	ENSG00000136450.11	ENSG00000168071.20										ENSG00000128573.21	ENSG00000273142.1
	ENSG00000136485.13	ENSG00000168081.7										ENSG00000128591.14	ENSG00000273188.1
	ENSG00000136492.7	ENSG00000168421.11										ENSG00000128596.15	ENSG00000273302.1
	ENSG00000136518.15	ENSG00000168685.13										ENSG00000128791.10	ENSG00000273373.1
	ENSG00000136628.16	ENSG00000168918.12										ENSG00000128881.15	ENSG00000273402.1
	ENSG00000136732.13	ENSG00000169313.9										ENSG00000129116.16	ENSG00000273448.1
	ENSG00000136811.15	ENSG00000169403.10										ENSG00000129194.6	ENSG00000274051.1
	ENSG00000136824.17	ENSG00000169413.2										ENSG00000129244.7	ENSG00000274105.1
	ENSG00000136875.11	ENSG00000169442.7										ENSG00000129473.8	ENSG00000274292.1
	ENSG00000136982.5	ENSG00000169499.13										ENSG00000129596.4	ENSG00000274460.1
	ENSG00000137135.16	ENSG00000169508.6										ENSG00000129946.9	ENSG00000274756.1
	ENSG00000137309.18	ENSG00000169896.15										ENSG00000130037.4	ENSG00000274925.1
	ENSG00000137310.10	ENSG00000170006.10										ENSG00000130176.6	ENSG00000275131.1
	ENSG00000137563.10	ENSG00000170027.6										ENSG00000130224.13	ENSG00000275582.1
	ENSG00000137656.10	ENSG00000170396.7										ENSG00000130226.15	ENSG00000275854.1
	ENSG00000137692.10	ENSG00000170819.4										ENSG00000130779.18	ENSG00000275888.1
	ENSG00000137700.15	ENSG00000171608.14										ENSG00000130822.14	ENSG00000276517.1
	ENSG00000137804.11	ENSG00000171659.12										ENSG00000131016.15	ENSG00000277072.3
	ENSG00000137807.12	ENSG00000171791.11										ENSG00000131018.21	ENSG00000277687.1
	ENSG00000137812.18	ENSG00000172116.20										ENSG00000131171.11	ENSG00000277744.1
	ENSG00000137942.15	ENSG00000172215.5										ENSG00000131381.11	ENSG00000278129.1
	ENSG00000137996.11	ENSG00000172243.16										ENSG00000131435.11	ENSG00000278600.1
	ENSG00000138018.16	ENSG00000172322.12										ENSG00000131471.5	ENSG00000278784.1
	ENSG00000138073.12	ENSG00000172349.15										ENSG00000131668.12	ENSG00000278864.1
	ENSG00000138074.13	ENSG00000172575.10										ENSG00000131711.13	ENSG00000278867.1
	ENSG00000138092.9	ENSG00000172578.10										ENSG00000131730.14	ENSG00000278888.1
	ENSG00000138160.5	ENSG00000172673.9										ENSG00000131831.16	ENSG00000278949.1
	ENSG00000138180.14	ENSG00000172724.10										ENSG00000132196.12	ENSG00000279066.1
	ENSG00000138182.13	ENSG00000172794.18										ENSG00000132329.9	ENSG00000279089.1
	ENSG00000138346.13	ENSG00000173200.11										ENSG00000132561.12	ENSG00000279159.1
	ENSG00000138376.9	ENSG00000173762.6										ENSG00000132563.14	ENSG00000279203.1
	ENSG00000138413.12	ENSG00000174004.5										ENSG00000132613.13	ENSG00000279277.1
	ENSG00000138778.10	ENSG00000174123.9										ENSG00000132639.11	ENSG00000279278.1
	ENSG00000139146.12	ENSG00000174125.6										ENSG00000132718.8	ENSG00000279382.1
	ENSG00000139160.12	ENSG00000174130.11										ENSG00000132837.13	ENSG00000279432.1
	ENSG00000139546.9	ENSG00000174255.6										ENSG00000132840.8	ENSG00000279434.1
	ENSG00000139618.13	ENSG00000174500.11										ENSG00000132938.17	ENSG00000279488.1
	ENSG00000139734.16	ENSG00000174946.6										ENSG00000133083.13	ENSG00000279591.1
	ENSG00000140525.16	ENSG00000175463.10										ENSG00000133104.11	ENSG00000279649.1
	ENSG00000140534.12	ENSG00000175567.7										ENSG00000133107.13	ENSG00000279696.1
	ENSG00000141543.8	ENSG00000175857.7										ENSG00000133116.7	ENSG00000279716.1
	ENSG00000142230.10	ENSG00000176160.8										ENSG00000133121.19	ENSG00000279738.1
	ENSG00000142528.14	ENSG00000176788.8										ENSG00000133169.5	ENSG00000279744.1
	ENSG00000142675.16	ENSG00000177272.8										ENSG00000133392.15	ENSG00000279759.1
	ENSG00000142731.9	ENSG00000177455.10										ENSG00000133816.12	ENSG00000279799.1
	ENSG00000142875.18	ENSG00000177494.5										ENSG00000133878.7	ENSG00000279880.1
	ENSG00000142945.11	ENSG00000177721.4										ENSG00000134030.12	ENSG00000279900.1
	ENSG00000143228.11	ENSG00000178199.12										ENSG00000134121.8	ENSG00000279917.1
	ENSG00000143321.17	ENSG00000178562.16										ENSG00000134198.8	ENSG00000279926.1
	ENSG00000143476.16	ENSG00000179088.13										ENSG00000134201.9	ENSG00000280063.1
	ENSG00000143493.11	ENSG00000179144.4										ENSG00000134532.14	ENSG00000280067.1
	ENSG00000143499.12	ENSG00000179344.15										ENSG00000134533.5	ENSG00000280069.1
	ENSG00000143621.15	ENSG00000179583.16										ENSG00000134769.20	ENSG00000280077.1
	ENSG00000143674.9	ENSG00000179840.5										ENSG00000134775.14	ENSG00000280138.1
	ENSG00000143727.14	ENSG00000180096.10										ENSG00000134874.16	ENSG00000280328.1
	ENSG00000143761.12	ENSG00000180353.9										ENSG00000134917.9	ENSG00000280332.1
	ENSG00000143870.11	ENSG00000180448.9										ENSG00000135205.13	ENSG00000280334.1
	ENSG00000144136.9	ENSG00000180539.7										ENSG00000135298.12	ENSG00000280383.1
	ENSG00000144381.15	ENSG00000180549.7										ENSG00000135333.12	ENSG00000280828.1
	ENSG00000144395.16	ENSG00000180644.6										ENSG00000135406.12	ENSG00000280927.1
	ENSG00000144554.9	ENSG00000181036.12										ENSG00000135424.14	ENSG00000281026.1
	ENSG00000144580.12	ENSG00000181617.5										ENSG00000135447.15	ENSG00000281433.1
	ENSG00000144591.16	ENSG00000181631.6										ENSG00000135502.15	ENSG00000281490.1
	ENSG00000144597.12	ENSG00000181847.10										ENSG00000135835.9	ENSG00000281584.1
	ENSG00000144867.10	ENSG00000181896.10										ENSG00000135842.15	ENSG00000281896.1
	ENSG00000145194.16	ENSG00000182162.8										ENSG00000135931.16
	ENSG00000145386.8	ENSG00000182183.13										ENSG00000136002.15
	ENSG00000145604.14	ENSG00000182487.11										ENSG00000136161.11
	ENSG00000146143.16	ENSG00000182866.15										ENSG00000136267.12
	ENSG00000146263.10	ENSG00000183484.10										ENSG00000136274.8
	ENSG00000146410.10	ENSG00000183813.6										ENSG00000136383.6
	ENSG00000146670.8	ENSG00000183918.13										ENSG00000136546.12
	ENSG00000146731.9	ENSG00000184293.6										ENSG00000136842.12
	ENSG00000146918.18	ENSG00000184682.5										ENSG00000136895.17
	ENSG00000147140.14	ENSG00000184922.12										ENSG00000137075.16
	ENSG00000147536.10	ENSG00000185245.7										ENSG00000137076.17
	ENSG00000147862.13	ENSG00000185482.6										ENSG00000137094.13
	ENSG00000148110.14	ENSG00000185527.10										ENSG00000137103.15
	ENSG00000148248.12	ENSG00000185668.6										ENSG00000137124.6
	ENSG00000148357.15	ENSG00000185669.5										ENSG00000137273.3
	ENSG00000148459.14	ENSG00000185811.15										ENSG00000137726.14
	ENSG00000148606.11	ENSG00000185862.6										ENSG00000137727.11
	ENSG00000148773.11	ENSG00000185905.3										ENSG00000137941.15
	ENSG00000149136.6	ENSG00000186265.8										ENSG00000138080.12
	ENSG00000149428.17	ENSG00000186517.12										ENSG00000138131.3
	ENSG00000149554.11	ENSG00000186810.7										ENSG00000138593.7
	ENSG00000149636.14	ENSG00000187764.10										ENSG00000138639.16
	ENSG00000150753.10	ENSG00000187808.4										ENSG00000138650.8
	ENSG00000150768.14	ENSG00000187848.11										ENSG00000138685.11
	ENSG00000151503.11	ENSG00000187862.10										ENSG00000138735.14
	ENSG00000151725.10	ENSG00000187912.10										ENSG00000138738.9
	ENSG00000151778.9	ENSG00000188389.9										ENSG00000138769.9
	ENSG00000152253.7	ENSG00000188404.7										ENSG00000138944.7
	ENSG00000152455.14	ENSG00000188452.12										ENSG00000139112.9
	ENSG00000152782.15	ENSG00000188676.12										ENSG00000139910.18
	ENSG00000153044.8	ENSG00000188820.11										ENSG00000140092.13
	ENSG00000154124.4	ENSG00000188822.7										ENSG00000140285.8
	ENSG00000154429.9	ENSG00000188848.14										ENSG00000140350.14
	ENSG00000154473.16	ENSG00000188958.8										ENSG00000140416.18
	ENSG00000154839.8	ENSG00000189233.10										ENSG00000140682.17
	ENSG00000154920.13	ENSG00000196092.11										ENSG00000140836.13
	ENSG00000155189.10	ENSG00000196126.9										ENSG00000141052.16
	ENSG00000155561.13	ENSG00000196189.11										ENSG00000141161.10
	ENSG00000155660.9	ENSG00000196329.9										ENSG00000141338.12
	ENSG00000156469.7	ENSG00000196405.11										ENSG00000141404.14
	ENSG00000156599.9	ENSG00000196664.4										ENSG00000141639.10
	ENSG00000156787.15	ENSG00000196684.11										ENSG00000141905.16
	ENSG00000156802.11	ENSG00000196715.5										ENSG00000142173.13
	ENSG00000156876.9	ENSG00000196735.10										ENSG00000142279.11
	ENSG00000156970.11	ENSG00000196743.7										ENSG00000142459.7
	ENSG00000157212.17	ENSG00000197057.7										ENSG00000142798.15
	ENSG00000157445.13	ENSG00000197471.10										ENSG00000143028.8
	ENSG00000157456.6	ENSG00000197540.6										ENSG00000143171.11
	ENSG00000158402.17	ENSG00000197549.8										ENSG00000143318.11
	ENSG00000158435.6	ENSG00000197629.5										ENSG00000143337.17
	ENSG00000158480.9	ENSG00000197646.7										ENSG00000143515.15
	ENSG00000158850.13	ENSG00000197705.8										ENSG00000143549.18
	ENSG00000159055.3	ENSG00000197880.7										ENSG00000143772.8
	ENSG00000159131.15	ENSG00000197943.8										ENSG00000143816.7
	ENSG00000159147.16	ENSG00000198106.8										ENSG00000143878.9
	ENSG00000159259.7	ENSG00000198178.9										ENSG00000143924.17
	ENSG00000159399.8	ENSG00000198223.13										ENSG00000143995.18
	ENSG00000160014.15	ENSG00000198520.9										ENSG00000144031.10
	ENSG00000160211.14	ENSG00000198771.9										ENSG00000144230.15
	ENSG00000160949.15	ENSG00000198821.9										ENSG00000144339.10
	ENSG00000160957.11	ENSG00000198851.8										ENSG00000144410.4
	ENSG00000161179.12	ENSG00000198879.10										ENSG00000144619.13
	ENSG00000161298.15	ENSG00000203497.2										ENSG00000144642.19
	ENSG00000161671.15	ENSG00000203710.9										ENSG00000144649.7
	ENSG00000161800.11	ENSG00000204165.5										ENSG00000144668.10
	ENSG00000161888.10	ENSG00000204252.11										ENSG00000144712.10
	ENSG00000162062.13	ENSG00000204257.13										ENSG00000144730.15
	ENSG00000162063.11	ENSG00000204261.7										ENSG00000144749.12
	ENSG00000162073.12	ENSG00000204287.12										ENSG00000144792.8
	ENSG00000162377.5	ENSG00000204475.8										ENSG00000144824.18
	ENSG00000162599.14	ENSG00000204592.8										ENSG00000144847.11
	ENSG00000162607.11	ENSG00000204642.12										ENSG00000144857.13
	ENSG00000162736.14	ENSG00000205045.7										ENSG00000144891.16
	ENSG00000163006.10	ENSG00000205056.8										ENSG00000144935.13
	ENSG00000163507.12	ENSG00000205784.2										ENSG00000145012.11
	ENSG00000163535.16	ENSG00000205929.8										ENSG00000145147.18
	ENSG00000163683.10	ENSG00000211593.2										ENSG00000145362.15
	ENSG00000163781.11	ENSG00000211689.5										ENSG00000145391.12
	ENSG00000163808.15	ENSG00000211694.2										ENSG00000145687.14
	ENSG00000163902.10	ENSG00000211698.2										ENSG00000145721.10
	ENSG00000163918.9	ENSG00000211699.2										ENSG00000145730.19
	ENSG00000164032.10	ENSG00000211706.2										ENSG00000145777.13
	ENSG00000164045.10	ENSG00000211710.3										ENSG00000145861.7
	ENSG00000164087.6	ENSG00000211714.3										ENSG00000145936.7
	ENSG00000164109.12	ENSG00000211716.2										ENSG00000145990.9
	ENSG00000164134.11	ENSG00000211721.2										ENSG00000146001.5
	ENSG00000164284.13	ENSG00000211724.3										ENSG00000146122.15
	ENSG00000164440.13	ENSG00000211727.3										ENSG00000146151.11
	ENSG00000164466.11	ENSG00000211728.2										ENSG00000146267.11
	ENSG00000164611.11	ENSG00000211734.3										ENSG00000146352.11
	ENSG00000164934.12	ENSG00000211746.3										ENSG00000146373.15
	ENSG00000165119.17	ENSG00000211747.3										ENSG00000146374.12
	ENSG00000165244.6	ENSG00000211750.2										ENSG00000146469.11
	ENSG00000165304.6	ENSG00000211751.6										ENSG00000147027.3
	ENSG00000165480.14	ENSG00000211753.3										ENSG00000147100.8
	ENSG00000165490.11	ENSG00000211772.7										ENSG00000147166.9
	ENSG00000165609.11	ENSG00000211776.2										ENSG00000147234.9
	ENSG00000165661.14	ENSG00000211777.2										ENSG00000147526.18
	ENSG00000165891.14	ENSG00000211778.2										ENSG00000147576.14
	ENSG00000166197.15	ENSG00000211779.3										ENSG00000147588.6
	ENSG00000166432.13	ENSG00000211780.3										ENSG00000147655.9
	ENSG00000166451.12	ENSG00000211782.2										ENSG00000147852.14
	ENSG00000166501.11	ENSG00000211784.2										ENSG00000148120.13
	ENSG00000166508.16	ENSG00000211785.1										ENSG00000148175.11
	ENSG00000166598.11	ENSG00000211786.3										ENSG00000148180.15
	ENSG00000166788.8	ENSG00000211787.1										ENSG00000148411.6
	ENSG00000166803.9	ENSG00000211788.2										ENSG00000148516.20
	ENSG00000166851.13	ENSG00000211789.2										ENSG00000148541.11
	ENSG00000166986.11	ENSG00000211790.2										ENSG00000148660.19
	ENSG00000167004.11	ENSG00000211791.2										ENSG00000149294.15
	ENSG00000167130.16	ENSG00000211792.2										ENSG00000149451.16
	ENSG00000167325.13	ENSG00000211793.2										ENSG00000149489.7
	ENSG00000167513.7	ENSG00000211794.3										ENSG00000149575.5
	ENSG00000167553.13	ENSG00000211795.3										ENSG00000149582.14
	ENSG00000167645.15	ENSG00000211796.1										ENSG00000149591.15
	ENSG00000167670.14	ENSG00000211797.2										ENSG00000149596.6
	ENSG00000167747.12	ENSG00000211799.3										ENSG00000149639.13
	ENSG00000167900.10	ENSG00000211800.3										ENSG00000149970.13
	ENSG00000167977.7	ENSG00000211801.3										ENSG00000150051.12
	ENSG00000168078.8	ENSG00000211802.3										ENSG00000150054.17
	ENSG00000168393.11	ENSG00000211803.2										ENSG00000150281.6
	ENSG00000168411.12	ENSG00000211807.3										ENSG00000150510.14
	ENSG00000168439.15	ENSG00000211810.3										ENSG00000150625.15
	ENSG00000168476.10	ENSG00000211816.2										ENSG00000150672.15
	ENSG00000168488.17	ENSG00000211820.1										ENSG00000150764.12
	ENSG00000168496.3	ENSG00000211898.6										ENSG00000151067.19
	ENSG00000168883.18	ENSG00000211899.6										ENSG00000151090.16
	ENSG00000169223.13	ENSG00000211978.2										ENSG00000151240.14
	ENSG00000169242.10	ENSG00000213203.2										ENSG00000151320.9
	ENSG00000169252.5	ENSG00000213445.7										ENSG00000151322.17
	ENSG00000169607.11	ENSG00000213654.8										ENSG00000151617.14
	ENSG00000169679.13	ENSG00000213809.7										ENSG00000151729.9
	ENSG00000169813.15	ENSG00000213999.14										ENSG00000151789.8
	ENSG00000170266.14	ENSG00000214140.9										ENSG00000151892.13
	ENSG00000170312.14	ENSG00000214900.7										ENSG00000151929.8
	ENSG00000170779.10	ENSG00000218052.5										ENSG00000151967.17
	ENSG00000171241.7	ENSG00000220008.3										ENSG00000152049.6
	ENSG00000171320.13	ENSG00000223534.1										ENSG00000152137.5
	ENSG00000171763.16	ENSG00000223865.9										ENSG00000152217.15
	ENSG00000171817.15	ENSG00000224003.1										ENSG00000152409.8
	ENSG00000171848.12	ENSG00000224137.1										ENSG00000152492.12
	ENSG00000172167.6	ENSG00000224220.1										ENSG00000152583.11
	ENSG00000172244.7	ENSG00000224557.6										ENSG00000152661.7
	ENSG00000172269.15	ENSG00000224875.2										ENSG00000152784.14
	ENSG00000172531.13	ENSG00000225079.2										ENSG00000152785.6
	ENSG00000172554.10	ENSG00000225783.5										ENSG00000152931.7
	ENSG00000173207.11	ENSG00000225864.1										ENSG00000152954.10
	ENSG00000173208.3	ENSG00000226660.2										ENSG00000153179.10
	ENSG00000173638.17	ENSG00000226777.6										ENSG00000153310.17
	ENSG00000173653.6	ENSG00000226979.7										ENSG00000153446.14
	ENSG00000173744.16	ENSG00000227039.5										ENSG00000153902.12
	ENSG00000173801.15	ENSG00000227191.5										ENSG00000153956.14
	ENSG00000173894.9	ENSG00000227507.2										ENSG00000154175.15
	ENSG00000174013.7	ENSG00000228427.1										ENSG00000154240.15
	ENSG00000174371.15	ENSG00000228857.2										ENSG00000154258.15
	ENSG00000174442.10	ENSG00000228863.7										ENSG00000154262.11
	ENSG00000174669.10	ENSG00000229106.1										ENSG00000154330.11
	ENSG00000175063.15	ENSG00000229474.5										ENSG00000154553.12
	ENSG00000175216.13	ENSG00000230006.6										ENSG00000154556.16
	ENSG00000175305.15	ENSG00000230099.2										ENSG00000154678.15
	ENSG00000175643.8	ENSG00000230138.1										ENSG00000154721.13
	ENSG00000175707.8	ENSG00000230155.5										ENSG00000154917.9
	ENSG00000175792.10	ENSG00000230747.1										ENSG00000155016.16
	ENSG00000176102.10	ENSG00000231105.1										ENSG00000155090.13
	ENSG00000176890.14	ENSG00000231389.6										ENSG00000155099.6
	ENSG00000176974.16	ENSG00000231999.5										ENSG00000155254.11
	ENSG00000177084.15	ENSG00000232613.5										ENSG00000155368.15
	ENSG00000177380.12	ENSG00000232713.2										ENSG00000155816.18
	ENSG00000177542.9	ENSG00000232869.2										ENSG00000155970.10
	ENSG00000177602.5	ENSG00000233093.4										ENSG00000155974.10
	ENSG00000178295.13	ENSG00000233306.2										ENSG00000155980.10
	ENSG00000178409.12	ENSG00000233355.5										ENSG00000156049.6
	ENSG00000178691.9	ENSG00000233806.6										ENSG00000156050.7
	ENSG00000178966.14	ENSG00000234184.4										ENSG00000156113.19
	ENSG00000178999.11	ENSG00000234663.4										ENSG00000156218.11
	ENSG00000179051.12	ENSG00000234883.3										ENSG00000156642.15
	ENSG00000179218.12	ENSG00000235532.1										ENSG00000156650.11
	ENSG00000180198.14	ENSG00000235568.5										ENSG00000156804.6
	ENSG00000181513.13	ENSG00000235831.5										ENSG00000157110.14
	ENSG00000181544.12	ENSG00000236977.1										ENSG00000157404.14
	ENSG00000181722.14	ENSG00000237111.1										ENSG00000157570.10
	ENSG00000181789.13	ENSG00000237484.5										ENSG00000157680.14
	ENSG00000181938.12	ENSG00000237499.5										ENSG00000157985.16
	ENSG00000182173.11	ENSG00000237513.1										ENSG00000158186.11
	ENSG00000182199.9	ENSG00000237702.2										ENSG00000158246.7
	ENSG00000182481.7	ENSG00000237914.4										ENSG00000158270.11
	ENSG00000182700.4	ENSG00000237989.1										ENSG00000158301.17
	ENSG00000182934.10	ENSG00000238121.4										ENSG00000158445.7
	ENSG00000183010.15	ENSG00000239636.1										ENSG00000158458.18
	ENSG00000183048.10	ENSG00000239713.6										ENSG00000158560.13
	ENSG00000183207.11	ENSG00000239961.2										ENSG00000159176.12
	ENSG00000183258.10	ENSG00000240040.4										ENSG00000159251.6
	ENSG00000183684.7	ENSG00000240505.7										ENSG00000159307.17
	ENSG00000183763.7	ENSG00000241106.5										ENSG00000159322.16
	ENSG00000183765.19	ENSG00000241163.6										ENSG00000159433.10
	ENSG00000183814.14	ENSG00000241657.1										ENSG00000159556.8
	ENSG00000183856.9	ENSG00000241666.2										ENSG00000159899.13
	ENSG00000184207.8	ENSG00000242258.1										ENSG00000160097.14
	ENSG00000184307.12	ENSG00000242574.7										ENSG00000160396.8
	ENSG00000184445.10	ENSG00000243811.6										ENSG00000160445.9
	ENSG00000184575.10	ENSG00000244509.3										ENSG00000160539.4
	ENSG00000184661.12	ENSG00000244720.1										ENSG00000160613.11
	ENSG00000184840.10	ENSG00000245164.5										ENSG00000161281.9
	ENSG00000184898.6	ENSG00000245904.3										ENSG00000161594.6
	ENSG00000185129.5	ENSG00000245954.5										ENSG00000162104.8
	ENSG00000185238.11	ENSG00000246084.2										ENSG00000162373.11
	ENSG00000185347.16	ENSG00000246223.7										ENSG00000162378.11
	ENSG00000185432.11	ENSG00000247287.2										ENSG00000162409.9
	ENSG00000185480.10	ENSG00000247774.5										ENSG00000162426.13
	ENSG00000185624.13	ENSG00000247982.5										ENSG00000162512.14
	ENSG00000185813.9	ENSG00000248996.1										ENSG00000162520.13
	ENSG00000186185.12	ENSG00000249437.6										ENSG00000162595.4
	ENSG00000186193.8	ENSG00000249978.1										ENSG00000162614.17
	ENSG00000186638.14	ENSG00000251034.1										ENSG00000162616.8
	ENSG00000186871.6	ENSG00000253364.1										ENSG00000162733.15
	ENSG00000187522.12	ENSG00000253535.4										ENSG00000162998.4
	ENSG00000187741.13	ENSG00000253701.2										ENSG00000162999.11
	ENSG00000187824.7	ENSG00000254503.1										ENSG00000163017.12
	ENSG00000187951.9	ENSG00000254802.1										ENSG00000163145.11
	ENSG00000188171.13	ENSG00000254838.5										ENSG00000163162.7
	ENSG00000188177.12	ENSG00000255240.4										ENSG00000163171.7
	ENSG00000188486.3	ENSG00000255354.1										ENSG00000163297.15
	ENSG00000188610.11	ENSG00000255733.4										ENSG00000163328.12
	ENSG00000188906.12	ENSG00000255760.1										ENSG00000163346.15
	ENSG00000188976.9	ENSG00000255819.5										ENSG00000163377.13
	ENSG00000189057.9	ENSG00000255833.1										ENSG00000163378.12
	ENSG00000189091.11	ENSG00000255987.1										ENSG00000163380.14
	ENSG00000196230.11	ENSG00000256262.1										ENSG00000163412.11
	ENSG00000196275.12	ENSG00000256553.1										ENSG00000163431.12
	ENSG00000196290.13	ENSG00000256594.6										ENSG00000163453.10
	ENSG00000196363.8	ENSG00000256633.1										ENSG00000163531.14
	ENSG00000196449.3	ENSG00000257027.1										ENSG00000163590.12
	ENSG00000196550.9	ENSG00000257242.5										ENSG00000163596.15
	ENSG00000196584.2	ENSG00000258572.1										ENSG00000163637.10
	ENSG00000196591.10	ENSG00000258733.4										ENSG00000163681.13
	ENSG00000196605.6	ENSG00000258760.1										ENSG00000163749.16
	ENSG00000197157.9	ENSG00000258810.1										ENSG00000163754.16
	ENSG00000197275.11	ENSG00000258875.4										ENSG00000163792.6
	ENSG00000197299.9	ENSG00000258929.5										ENSG00000163815.5
	ENSG00000197451.9	ENSG00000259436.1										ENSG00000163820.13
	ENSG00000197472.13	ENSG00000259834.1										ENSG00000163873.8
	ENSG00000197776.6	ENSG00000259881.1										ENSG00000163932.12
	ENSG00000198056.12	ENSG00000260101.1										ENSG00000164106.6
	ENSG00000198176.11	ENSG00000260719.1										ENSG00000164107.8
	ENSG00000198492.13	ENSG00000260997.1										ENSG00000164114.17
	ENSG00000198522.12	ENSG00000261218.4										ENSG00000164116.15
	ENSG00000198554.10	ENSG00000261416.1										ENSG00000164122.7
	ENSG00000198826.9	ENSG00000261448.1										ENSG00000164197.10
	ENSG00000198876.11	ENSG00000261644.1										ENSG00000164309.13
	ENSG00000198900.5	ENSG00000261786.1										ENSG00000164326.4
	ENSG00000198901.12	ENSG00000262312.2										ENSG00000164509.12
	ENSG00000198924.6	ENSG00000263366.2										ENSG00000164619.7
	ENSG00000203506.4	ENSG00000263482.3										ENSG00000164741.13
	ENSG00000203709.8	ENSG00000265100.1										ENSG00000164764.10
	ENSG00000203760.7	ENSG00000265148.4										ENSG00000164776.8
	ENSG00000204673.9	ENSG00000265206.3										ENSG00000164850.13
	ENSG00000204899.5	ENSG00000266088.4										ENSG00000164946.18
	ENSG00000205208.4	ENSG00000266094.5										ENSG00000164949.6
	ENSG00000205930.7	ENSG00000267040.5										ENSG00000165028.10
	ENSG00000206053.11	ENSG00000267046.1										ENSG00000165072.9
	ENSG00000207770.1	ENSG00000267074.1										ENSG00000165124.16
	ENSG00000213024.9	ENSG00000267121.4										ENSG00000165186.10
	ENSG00000213281.4	ENSG00000267364.1										ENSG00000165194.13
	ENSG00000213551.4	ENSG00000267369.1										ENSG00000165259.12
	ENSG00000213753.9	ENSG00000267731.1										ENSG00000165300.7
	ENSG00000214160.8	ENSG00000267787.4										ENSG00000165323.14
	ENSG00000215251.3	ENSG00000268001.1										ENSG00000165338.15
	ENSG00000215784.5	ENSG00000268027.4										ENSG00000165379.12
	ENSG00000221829.8	ENSG00000268895.4										ENSG00000165410.13
	ENSG00000225194.2	ENSG00000269220.1										ENSG00000165424.6
	ENSG00000225670.4	ENSG00000269404.5										ENSG00000165462.5
	ENSG00000226711.5	ENSG00000270049.1										ENSG00000165495.14
	ENSG00000230148.7	ENSG00000270164.1										ENSG00000165633.11
	ENSG00000232046.5	ENSG00000271503.4										ENSG00000165698.14
	ENSG00000233178.6	ENSG00000271605.4										ENSG00000165821.10
	ENSG00000233416.1	ENSG00000271856.1										ENSG00000165868.11
	ENSG00000233822.4	ENSG00000271964.1										ENSG00000165914.13
	ENSG00000233966.1	ENSG00000272053.1										ENSG00000165943.4
	ENSG00000235020.3	ENSG00000272282.1										ENSG00000165966.13
	ENSG00000235257.7	ENSG00000272529.1										ENSG00000165995.17
	ENSG00000235865.2	ENSG00000272908.1										ENSG00000165996.12
	ENSG00000235927.4	ENSG00000273445.1										ENSG00000166025.16
	ENSG00000237037.8	ENSG00000273669.1										ENSG00000166086.11
	ENSG00000237596.5	ENSG00000274712.1										ENSG00000166091.18
	ENSG00000237649.6	ENSG00000274752.1										ENSG00000166165.11
	ENSG00000240764.3	ENSG00000275791.1										ENSG00000166173.10
	ENSG00000242114.4	ENSG00000276136.1										ENSG00000166250.10
	ENSG00000242372.5	ENSG00000276231.3										ENSG00000166292.10
	ENSG00000243364.6	ENSG00000276557.1										ENSG00000166313.17
	ENSG00000244038.8	ENSG00000276953.1										ENSG00000166333.12
	ENSG00000244462.6	ENSG00000277030.1										ENSG00000166341.7
	ENSG00000245869.2	ENSG00000277734.3										ENSG00000166402.7
	ENSG00000247626.4	ENSG00000278030.1										ENSG00000166405.13
	ENSG00000248309.4	ENSG00000278195.1										ENSG00000166407.12
	ENSG00000250280.2	ENSG00000278982.1										ENSG00000166444.16
	ENSG00000250360.1	ENSG00000279149.1										ENSG00000166482.10
	ENSG00000253729.6	ENSG00000279369.1										ENSG00000166503.7
	ENSG00000254847.1	ENSG00000280135.1										ENSG00000166532.14
	ENSG00000256269.5	ENSG00000280153.1										ENSG00000166573.5
	ENSG00000256663.1	ENSG00000280194.1										ENSG00000166592.10
	ENSG00000257058.1	ENSG00000281103.1										ENSG00000166770.9
	ENSG00000259319.1											ENSG00000166780.9
	ENSG00000259683.1											ENSG00000166831.7
	ENSG00000259976.1											ENSG00000166833.18
	ENSG00000260977.1											ENSG00000166963.11
	ENSG00000261064.1											ENSG00000166971.15
	ENSG00000263264.1											ENSG00000167081.15
	ENSG00000263513.4											ENSG00000167281.17
	ENSG00000263874.1											ENSG00000167549.17
	ENSG00000264176.1											ENSG00000167552.12
	ENSG00000265415.1											ENSG00000167641.9
	ENSG00000265972.4											ENSG00000167654.16
	ENSG00000267254.4											ENSG00000167657.10
	ENSG00000267690.1											ENSG00000167676.3
	ENSG00000268861.4											ENSG00000167693.15
	ENSG00000268912.1											ENSG00000168056.13
	ENSG00000271601.3											ENSG00000168079.15
	ENSG00000271882.1											ENSG00000168309.15
	ENSG00000273162.1											ENSG00000168386.17
	ENSG00000274641.1											ENSG00000168477.16
	ENSG00000276043.3											ENSG00000168497.4
	ENSG00000277152.1											ENSG00000168502.16
	ENSG00000277778.1											ENSG00000168621.13
	ENSG00000278023.3											ENSG00000168675.17
	ENSG00000278259.3											ENSG00000168702.15
	ENSG00000278677.1											ENSG00000168734.12
	ENSG00000279118.1											ENSG00000168758.9
	ENSG00000279319.1											ENSG00000168843.12
	ENSG00000279645.1											ENSG00000168874.11
	ENSG00000279722.1											ENSG00000169018.5
	ENSG00000280047.1											ENSG00000169057.18
	ENSG00000280048.1											ENSG00000169071.13
	ENSG00000281005.1											ENSG00000169083.14
												ENSG00000169085.10
												ENSG00000169126.14
												ENSG00000169184.5
												ENSG00000169218.12
												ENSG00000169504.13
												ENSG00000169760.16
												ENSG00000169851.14
												ENSG00000169918.8
												ENSG00000169946.12
												ENSG00000169992.8
												ENSG00000170153.9
												ENSG00000170271.9
												ENSG00000170275.13
												ENSG00000170276.5
												ENSG00000170390.13
												ENSG00000170464.8
												ENSG00000170500.11
												ENSG00000170624.12
												ENSG00000170745.10
												ENSG00000171004.16
												ENSG00000171016.10
												ENSG00000171246.5
												ENSG00000171303.6
												ENSG00000171357.5
												ENSG00000171385.8
												ENSG00000171408.12
												ENSG00000171444.16
												ENSG00000171451.13
												ENSG00000171533.10
												ENSG00000171649.10
												ENSG00000171714.10
												ENSG00000171724.2
												ENSG00000171819.4
												ENSG00000171867.15
												ENSG00000171992.11
												ENSG00000172037.12
												ENSG00000172247.3
												ENSG00000172260.12
												ENSG00000172348.13
												ENSG00000172399.5
												ENSG00000172403.9
												ENSG00000172548.13
												ENSG00000172572.6
												ENSG00000172638.11
												ENSG00000172915.17
												ENSG00000172935.8
												ENSG00000173040.11
												ENSG00000173068.16
												ENSG00000173175.13
												ENSG00000173258.11
												ENSG00000173267.12
												ENSG00000173442.10
												ENSG00000173482.15
												ENSG00000173546.7
												ENSG00000173641.16
												ENSG00000173705.7
												ENSG00000173714.7
												ENSG00000173757.8
												ENSG00000173917.10
												ENSG00000174099.9
												ENSG00000174136.10
												ENSG00000174175.15
												ENSG00000174282.10
												ENSG00000174306.20
												ENSG00000174403.14
												ENSG00000174576.7
												ENSG00000174599.5
												ENSG00000174611.10
												ENSG00000174740.7
												ENSG00000174808.10
												ENSG00000174944.7
												ENSG00000175084.10
												ENSG00000175161.12
												ENSG00000175287.17
												ENSG00000175356.11
												ENSG00000175395.14
												ENSG00000175727.12
												ENSG00000175745.10
												ENSG00000175764.13
												ENSG00000175785.11
												ENSG00000175906.4
												ENSG00000175946.8
												ENSG00000176014.11
												ENSG00000176049.14
												ENSG00000176293.18
												ENSG00000176393.9
												ENSG00000176903.4
												ENSG00000177098.7
												ENSG00000177363.4
												ENSG00000177432.6
												ENSG00000177469.12
												ENSG00000177519.3
												ENSG00000177599.11
												ENSG00000177932.6
												ENSG00000177990.10
												ENSG00000178163.6
												ENSG00000178187.6
												ENSG00000178498.14
												ENSG00000178531.5
												ENSG00000178761.13
												ENSG00000179284.5
												ENSG00000179300.3
												ENSG00000179476.6
												ENSG00000179899.8
												ENSG00000179915.19
												ENSG00000179954.13
												ENSG00000179981.9
												ENSG00000180139.11
												ENSG00000180155.17
												ENSG00000180190.10
												ENSG00000180354.14
												ENSG00000180592.15
												ENSG00000180660.7
												ENSG00000180875.4
												ENSG00000180901.9
												ENSG00000180929.5
												ENSG00000181072.10
												ENSG00000181195.9
												ENSG00000181541.5
												ENSG00000181619.11
												ENSG00000181778.4
												ENSG00000181856.13
												ENSG00000181982.16
												ENSG00000182175.12
												ENSG00000182195.7
												ENSG00000182208.11
												ENSG00000182253.13
												ENSG00000182287.12
												ENSG00000182463.14
												ENSG00000182534.12
												ENSG00000182568.15
												ENSG00000182575.7
												ENSG00000182636.5
												ENSG00000182916.7
												ENSG00000182963.8
												ENSG00000182983.13
												ENSG00000183023.17
												ENSG00000183111.10
												ENSG00000183230.15
												ENSG00000183454.12
												ENSG00000183578.5
												ENSG00000183580.9
												ENSG00000183722.7
												ENSG00000183741.10
												ENSG00000183783.6
												ENSG00000183963.17
												ENSG00000184014.6
												ENSG00000184144.8
												ENSG00000184226.13
												ENSG00000184271.14
												ENSG00000184343.9
												ENSG00000184347.13
												ENSG00000184719.10
												ENSG00000184743.11
												ENSG00000184785.5
												ENSG00000184867.12
												ENSG00000184905.7
												ENSG00000185046.17
												ENSG00000185070.9
												ENSG00000185189.14
												ENSG00000185345.17
												ENSG00000185361.7
												ENSG00000185437.12
												ENSG00000185532.13
												ENSG00000185551.11
												ENSG00000185567.6
												ENSG00000185630.17
												ENSG00000185681.11
												ENSG00000186111.7
												ENSG00000186297.10
												ENSG00000186310.9
												ENSG00000186354.9
												ENSG00000186462.8
												ENSG00000186642.14
												ENSG00000186868.14
												ENSG00000187068.2
												ENSG00000187079.13
												ENSG00000187098.13
												ENSG00000187140.5
												ENSG00000187239.15
												ENSG00000187391.16
												ENSG00000187634.9
												ENSG00000187714.6
												ENSG00000187715.12
												ENSG00000187942.10
												ENSG00000187955.10
												ENSG00000188026.10
												ENSG00000188060.6
												ENSG00000188153.11
												ENSG00000188549.11
												ENSG00000188613.6
												ENSG00000188730.4
												ENSG00000188778.4
												ENSG00000188783.5
												ENSG00000188921.13
												ENSG00000188981.9
												ENSG00000189129.12
												ENSG00000189134.3
												ENSG00000189367.13
												ENSG00000196263.6
												ENSG00000196338.11
												ENSG00000196361.8
												ENSG00000196368.4
												ENSG00000196376.9
												ENSG00000196378.10
												ENSG00000196381.9
												ENSG00000196507.9
												ENSG00000196526.9
												ENSG00000196557.9
												ENSG00000196616.11
												ENSG00000196628.12
												ENSG00000196632.9
												ENSG00000196663.14
												ENSG00000196867.6
												ENSG00000196923.12
												ENSG00000196924.13
												ENSG00000197256.9
												ENSG00000197321.13
												ENSG00000197361.6
												ENSG00000197380.9
												ENSG00000197381.14
												ENSG00000197561.5
												ENSG00000197565.14
												ENSG00000197576.12
												ENSG00000197702.10
												ENSG00000197852.9
												ENSG00000197928.9
												ENSG00000197951.7
												ENSG00000198046.10
												ENSG00000198300.11
												ENSG00000198354.5
												ENSG00000198440.8
												ENSG00000198467.12
												ENSG00000198483.11
												ENSG00000198513.10
												ENSG00000198523.5
												ENSG00000198597.7
												ENSG00000198624.11
												ENSG00000198626.14
												ENSG00000198825.10
												ENSG00000198832.9
												ENSG00000198835.3
												ENSG00000198838.10
												ENSG00000198853.10
												ENSG00000198894.6
												ENSG00000198909.6
												ENSG00000198932.11
												ENSG00000198933.8
												ENSG00000198934.4
												ENSG00000198939.6
												ENSG00000198947.13
												ENSG00000203446.2
												ENSG00000203685.8
												ENSG00000203706.7
												ENSG00000203808.9
												ENSG00000203867.7
												ENSG00000204065.2
												ENSG00000204116.10
												ENSG00000204131.7
												ENSG00000204186.6
												ENSG00000204241.6
												ENSG00000204314.9
												ENSG00000204381.10
												ENSG00000204403.8
												ENSG00000204406.10
												ENSG00000204706.13
												ENSG00000204882.3
												ENSG00000204950.3
												ENSG00000205002.3
												ENSG00000205090.7
												ENSG00000205363.5
												ENSG00000205562.2
												ENSG00000205581.9
												ENSG00000205791.3
												ENSG00000205795.4
												ENSG00000206052.9
												ENSG00000206418.3
												ENSG00000206559.6
												ENSG00000206579.8
												ENSG00000208035.1
												ENSG00000212747.4
												ENSG00000213088.8
												ENSG00000213144.2
												ENSG00000213694.3
												ENSG00000213713.3
												ENSG00000213949.7
												ENSG00000214575.8
												ENSG00000214652.5
												ENSG00000214694.9
												ENSG00000215386.9
												ENSG00000216490.3
												ENSG00000219607.3
												ENSG00000219626.7
												ENSG00000220563.1
												ENSG00000221866.8
												ENSG00000221890.2
												ENSG00000223382.3
												ENSG00000223561.5
												ENSG00000223764.2
												ENSG00000224078.11
												ENSG00000224713.4
												ENSG00000224957.4
												ENSG00000224958.4
												ENSG00000225285.1
												ENSG00000225398.2
												ENSG00000225471.4
												ENSG00000225937.1
												ENSG00000225986.1
												ENSG00000226237.1
												ENSG00000227051.5
												ENSG00000227136.2
												ENSG00000227372.9
												ENSG00000227467.3
												ENSG00000228214.5
												ENSG00000228794.7
												ENSG00000229481.2
												ENSG00000229619.3
												ENSG00000230084.4
												ENSG00000230615.5
												ENSG00000231246.1
												ENSG00000231346.4
												ENSG00000231367.4
												ENSG00000231437.3
												ENSG00000231768.1
												ENSG00000232160.5
												ENSG00000232284.6
												ENSG00000232320.6
												ENSG00000232434.2
												ENSG00000232973.10
												ENSG00000233117.2
												ENSG00000233421.4
												ENSG00000233608.3
												ENSG00000234175.1
												ENSG00000234284.5
												ENSG00000234456.6
												ENSG00000234638.1
												ENSG00000234779.1
												ENSG00000234814.6
												ENSG00000235092.4
												ENSG00000235098.7
												ENSG00000235217.6
												ENSG00000235437.6
												ENSG00000235501.4
												ENSG00000235601.1
												ENSG00000235652.6
												ENSG00000235904.1
												ENSG00000235997.2
												ENSG00000236467.6
												ENSG00000236548.1
												ENSG00000236609.3
												ENSG00000236739.3
												ENSG00000237125.7
												ENSG00000237187.7
												ENSG00000237732.8
												ENSG00000237807.3
												ENSG00000237886.1
												ENSG00000238178.5
												ENSG00000239474.5
												ENSG00000240225.9
												ENSG00000240583.9
												ENSG00000240654.5
												ENSG00000240771.5
												ENSG00000241644.2
												ENSG00000241684.4
												ENSG00000241978.8
												ENSG00000242259.7
												ENSG00000242732.4
												ENSG00000242759.5
												ENSG00000243069.6
												ENSG00000243156.6
												ENSG00000243244.4
												ENSG00000245105.2
												ENSG00000246379.5
												ENSG00000246695.6
												ENSG00000246763.5
												ENSG00000247121.5
												ENSG00000247746.4
												ENSG00000247809.6
												ENSG00000247934.4
												ENSG00000248334.5
												ENSG00000248441.5
												ENSG00000248464.1
												ENSG00000248485.1
												ENSG00000248587.5
												ENSG00000248668.2
												ENSG00000249307.4
												ENSG00000249669.6
												ENSG00000250056.4
												ENSG00000250132.5
												ENSG00000250303.3
												ENSG00000250588.5
												ENSG00000250734.2
												ENSG00000251141.4
												ENSG00000251573.2
												ENSG00000251615.3
												ENSG00000253250.2
												ENSG00000253636.1
												ENSG00000253731.2
												ENSG00000253833.1
												ENSG00000254122.2
												ENSG00000254204.1
												ENSG00000254510.1
												ENSG00000254535.3
												ENSG00000254851.1
												ENSG00000255052.4
												ENSG00000255090.4
												ENSG00000255248.5
												ENSG00000255302.3
												ENSG00000255366.1
												ENSG00000255471.1
												ENSG00000255495.1
												ENSG00000255741.1
												ENSG00000255864.4
												ENSG00000256164.1
												ENSG00000256508.2
												ENSG00000257151.1
												ENSG00000257647.1
												ENSG00000258247.1
												ENSG00000258274.1
												ENSG00000258611.2
												ENSG00000258754.6
												ENSG00000258987.1
												ENSG00000259207.6
												ENSG00000259275.2
												ENSG00000259330.1
												ENSG00000259370.2
												ENSG00000259498.1
												ENSG00000259635.1
												ENSG00000259663.2
												ENSG00000260105.5
												ENSG00000260230.2
												ENSG00000260244.1
												ENSG00000260428.2
												ENSG00000260461.1
												ENSG00000260464.1
												ENSG00000260947.1
												ENSG00000261054.1
												ENSG00000261069.3
												ENSG00000261276.1
												ENSG00000261496.1
												ENSG00000261534.1
												ENSG00000261616.1
												ENSG00000261625.1
												ENSG00000261655.1
												ENSG00000261685.2
												ENSG00000262655.3
												ENSG00000262879.4
												ENSG00000262966.2
												ENSG00000263065.1
												ENSG00000263142.4
												ENSG00000263335.1
												ENSG00000265142.5
												ENSG00000265962.1
												ENSG00000266601.1
												ENSG00000266964.4
												ENSG00000267034.1
												ENSG00000267060.4
												ENSG00000267082.1
												ENSG00000267206.4
												ENSG00000267272.4
												ENSG00000267328.1
												ENSG00000267405.1
												ENSG00000267414.1
												ENSG00000267505.1
												ENSG00000267532.3
												ENSG00000267640.4
												ENSG00000268388.4
												ENSG00000268754.1
												ENSG00000269936.3
												ENSG00000270021.1
												ENSG00000270412.1
												ENSG00000270607.1
												ENSG00000272078.1
												ENSG00000272143.1
												ENSG00000272372.1
												ENSG00000272463.1
												ENSG00000272511.1
												ENSG00000272631.1
												ENSG00000272695.1
												ENSG00000272870.1
												ENSG00000273733.1
												ENSG00000273771.1
												ENSG00000274180.1
												ENSG00000276386.1
												ENSG00000277586.1
												ENSG00000277954.1
												ENSG00000278309.1
												ENSG00000278376.1
												ENSG00000278934.1
												ENSG00000278948.1
												ENSG00000279026.1
												ENSG00000279041.1
												ENSG00000279192.1
												ENSG00000279453.1
												ENSG00000279526.1
												ENSG00000279866.1
												ENSG00000279940.1
												ENSG00000280074.1
												ENSG00000280099.1
												ENSG00000280132.1
												ENSG00000280143.1
												ENSG00000280219.1
												ENSG00000280237.1
												ENSG00000280304.1
												ENSG00000280323.1
												ENSG00000280339.1
												ENSG00000280422.1
												ENSG00000280429.1
												ENSG00000280527.1
												ENSG00000280551.1
												ENSG00000281205.1
												ENSG00000281852.1

## Sheet: Supplementary Table S4
All of the 920 identified motifs with their scores in each of the 13 weighting scenarios
Node1	Node2	Node3	Mean degree	Mean betweenness	Mean absolute LFC	Mean AUC	hsa05200	Scenario 1	Scenario 2	Scenario 3	Scenario 4	Scenario 5	Scenario 6	Scenario 7	Scenario 8	Scenario 9	Scenario 10	Scenario 11	Scenario 12	Scenario 13
KCNA5	KCNH2	CAV1	14	6388.88	1.73222	0.822104	0	0.540038	0.888421	0.443682	0.467771	0.332762	0.554867	0.400266	0.511319	0.443814	0.477567	0.42204	0.455793	0.468035
KCNA5	CAV1	CACNA1C	17.6667	9223.63	1.95033	0.844681	0	0.732522	0.912819	0.499548	0.557791	0.374661	0.602866	0.466226	0.580328	0.488763	0.534546	0.477495	0.523277	0.536222
KCNA5	KCNH2	CACNA1C	13.6667	4331.02	2.12981	0.834279	0	0.443426	0.901578	0.545518	0.519995	0.409138	0.634533	0.464567	0.577264	0.521835	0.54955	0.493201	0.520915	0.47263
BAG2	BAG3	HSPA2	8.33333	1067.16	1.04873	0.713061	0	0.201221	0.770582	0.268616	0.251767	0.201462	0.394107	0.226614	0.322937	0.297785	0.310361	0.2622	0.274776	0.310105
BAG2	HSPA12A	BAG3	6	540.954	0.967457	0.739716	0	0.134885	0.799387	0.247799	0.219571	0.185849	0.385696	0.20271	0.302633	0.285773	0.294203	0.244241	0.252672	0.295518
BAG2	HSPB8	BAG3	7.33333	858.635	1.53146	0.745745	0	0.173538	0.805902	0.392261	0.33758	0.294196	0.495671	0.315888	0.416625	0.394933	0.405779	0.35541	0.366257	0.342925
KCTD10	KLHL42	KLHL41	2.33333	0.666667	1.28609	0.809574	0	0.0432392	0.87488	0.329412	0.257869	0.247059	0.465779	0.252464	0.361824	0.356419	0.359122	0.304442	0.307144	0.311883
KIF5A	NEFM	NEFL	5.66667	949.73	1.83673	0.822991	0	0.146677	0.889379	0.470451	0.389508	0.352838	0.575183	0.371173	0.482345	0.464011	0.473178	0.417592	0.426759	0.376627
SCN2B	ANK2	NFASC	6	1139.56	2.77743	0.904078	0	0.161193	0.977007	0.711395	0.573844	0.533546	0.777798	0.553695	0.675821	0.655672	0.665747	0.604684	0.614758	0.462399
SCN2B	SCN4B	NFASC	5.33333	276.449	2.55881	0.891371	0	0.110915	0.963275	0.6554	0.519279	0.49155	0.732369	0.505415	0.625824	0.61196	0.618892	0.558687	0.565619	0.432398
SCN2B	SCN4B	SCN7A	4	173.414	2.92735	0.898818	0	0.0816953	0.971323	0.749796	0.582771	0.562347	0.805177	0.572559	0.693974	0.683762	0.688868	0.62816	0.633266	0.450703
SCN2B	SCN4B	ANK2	6	1169.25	2.63936	0.900768	0	0.162498	0.97343	0.676031	0.547648	0.507023	0.750381	0.527336	0.649014	0.628702	0.638858	0.578019	0.588175	0.45299
SNAP25	CAV1	CACNA1C	19.6667	11377.1	1.79878	0.834161	0	0.864198	0.90145	0.46073	0.561597	0.345547	0.57091	0.453572	0.566253	0.458229	0.512241	0.4559	0.509913	0.556594
SNAP25	CACNB2	CACNA1C	13.3333	5844.25	2.08746	0.839894	0	0.503757	0.907645	0.534671	0.526943	0.401003	0.627915	0.463973	0.577429	0.514459	0.545944	0.489216	0.520701	0.486518
CAMK2G	GRIN2A	MECP2	7.33333	1363.75	0.979398	0.746395	1	0.195736	0.806604	0.250858	0.237077	0.271477	0.389794	0.254277	0.313436	0.330635	0.322036	0.292456	0.283856	0.396633
CAMK2G	CAMK2A	MECP2	11	5053.32	1.00948	0.740898	2	0.425788	0.800664	0.258563	0.300369	0.360589	0.394089	0.330479	0.347229	0.377339	0.362284	0.353909	0.338854	0.53792
CAMK2G	CAMK2A	MEF2D	12.6667	6101.18	1.00617	0.729965	2	0.502703	0.788848	0.257715	0.318962	0.359953	0.390498	0.339457	0.35473	0.375226	0.364978	0.357341	0.347094	0.553983
CAMK2G	MEF2A	MEF2D	7.66667	2099.19	0.568257	0.739953	1	0.234231	0.799642	0.14555	0.16772	0.192496	0.309073	0.180108	0.238397	0.250785	0.244591	0.215446	0.209252	0.378189
CAMK2G	GRIN2A	DLG2	10	3714.18	1.46266	0.773168	1	0.348416	0.835537	0.374637	0.368082	0.364311	0.489862	0.366197	0.428972	0.427087	0.42803	0.396642	0.397584	0.472981
CAMK2G	CAMK2A	GRIN2A	13	5883.98	1.49847	0.753369	2	0.499331	0.814141	0.38381	0.41269	0.454524	0.491393	0.433607	0.452041	0.472958	0.4625	0.453283	0.442824	0.590987
CAMK2G	CAMK2A	DLG2	13.6667	7403.76	1.49274	0.767671	2	0.578468	0.829597	0.382343	0.431374	0.453424	0.494157	0.442399	0.462765	0.47379	0.468278	0.458095	0.452582	0.614269
CAMK2G	CAMK2A	MEF2A	11.6667	5571.56	1.09064	0.757861	2	0.460909	0.818995	0.279351	0.324741	0.37618	0.414262	0.35046	0.369501	0.395221	0.382361	0.372841	0.359981	0.55648
CAMK2G	CAMK2A	MAPT	13.6667	7691.06	1.40851	0.744858	2	0.591094	0.804943	0.360768	0.418349	0.437242	0.471812	0.427796	0.44508	0.454527	0.449804	0.441161	0.436438	0.605868
IGF1	FGF7	KIT	11.6667	3133.71	2.21729	0.892199	3	0.35377	0.964169	0.567925	0.514386	0.675944	0.666986	0.595165	0.590686	0.671465	0.631076	0.633315	0.592926	0.721466
IGF1	FGF7	KL	9.33333	2320.99	2.10478	0.882742	2	0.274842	0.95395	0.539106	0.47304	0.570996	0.642817	0.522018	0.557928	0.606907	0.582417	0.564462	0.539973	0.608641
IGF1	FGF7	FGFR1	11.6667	3218.94	2.28343	0.91253	3	0.357516	0.98614	0.584866	0.528028	0.688649	0.685184	0.608339	0.606606	0.686917	0.646761	0.647628	0.607472	0.73213
IGF1	FGF7	HGF	11.6667	2705.01	2.26622	0.893617	3	0.33493	0.965702	0.580458	0.519076	0.685344	0.676769	0.60221	0.597923	0.681056	0.63949	0.641633	0.600066	0.720273
IGF1	ITGB3	FGF2	19.3333	6173	2.00792	0.866608	2	0.629316	0.936514	0.514298	0.543053	0.55239	0.619852	0.547721	0.581452	0.586121	0.583787	0.566921	0.564587	0.686699
IGF1	FGF2	KIT	14.3333	4411.16	2.0738	0.876359	3	0.459294	0.947052	0.531171	0.513202	0.648378	0.635142	0.58079	0.574172	0.64176	0.607966	0.611275	0.577481	0.734379
IGF1	FGF2	KL	12	3598.43	1.96128	0.866903	2	0.380366	0.936833	0.502352	0.471856	0.543431	0.610972	0.507643	0.541414	0.577202	0.559308	0.542422	0.524529	0.621555
IGF1	NGFR	FGF2	14.6667	6303.88	2.64947	0.897222	2	0.548648	0.969598	0.67862	0.646127	0.675632	0.751365	0.66088	0.698746	0.713498	0.706122	0.687189	0.679813	0.715883
IGF1	FGF2	FGFR1	14.3333	4496.38	2.13994	0.89669	3	0.46304	0.969023	0.548112	0.526844	0.661084	0.65334	0.593964	0.590092	0.657212	0.623652	0.625588	0.592028	0.745044
IGF1	FGF2	GDNF	14	3888.09	1.68985	0.83156	2	0.430133	0.89864	0.432828	0.432154	0.491287	0.549281	0.461721	0.490717	0.520284	0.505501	0.491002	0.476219	0.607067
IGF1	FGF2	DCN	13	3953.61	2.26178	0.897636	2	0.414495	0.970045	0.579319	0.538113	0.601156	0.677	0.569634	0.607557	0.639078	0.623317	0.604356	0.588595	0.657631
IGF1	FGF2	HGF	14.3333	3982.46	2.12273	0.877778	3	0.440454	0.948585	0.543704	0.517892	0.657778	0.644925	0.587835	0.581408	0.651352	0.61638	0.619593	0.584622	0.733186
IGF1	FGF10	KIT	11	3074.01	2.41063	0.887175	3	0.3388	0.95874	0.617446	0.547784	0.713084	0.702769	0.630434	0.625277	0.707927	0.666602	0.66918	0.627856	0.728747
IGF1	HGF	KIT	13.3333	3451.56	1.95328	0.871336	3	0.398603	0.941624	0.500303	0.474878	0.625227	0.610633	0.550052	0.542755	0.61793	0.580343	0.583991	0.546404	0.710132
IGF1	FGF10	FGFR1	11	3159.23	2.47677	0.907506	3	0.342546	0.980712	0.634386	0.561426	0.72579	0.720967	0.643608	0.641197	0.723378	0.682288	0.683493	0.642402	0.739411
IGF1	FGF10	HGF	11	2645.31	2.45956	0.888593	3	0.31996	0.960273	0.629979	0.552474	0.722484	0.712552	0.637479	0.632513	0.717518	0.675016	0.677499	0.634996	0.727553
IGF1	FGFR1	KL	11	3152.76	1.85797	0.880792	2	0.342261	0.951843	0.475891	0.442484	0.523585	0.594879	0.483034	0.518681	0.559232	0.538957	0.521133	0.500858	0.609165
IGF1	NGFR	HGF	13.6667	5344.28	2.52895	0.892199	2	0.487958	0.964169	0.647752	0.607803	0.652481	0.726856	0.630142	0.66733	0.689668	0.678499	0.659905	0.648736	0.691636
IGF1	FGFR1	HGF	13.3333	3536.79	2.01942	0.891667	3	0.402349	0.963595	0.517243	0.48852	0.637932	0.628831	0.563226	0.558675	0.633382	0.596029	0.598304	0.560951	0.720797
EPM2A	GYG1	PPP1R3C	3	382.417	1.28332	0.813002	0	0.072362	0.878585	0.328703	0.264617	0.246527	0.466173	0.255572	0.365395	0.35635	0.360873	0.305961	0.310484	0.319912
NLGN1	NRXN3	NLGN3	6	1300.76	2.24032	0.867139	0	0.168277	0.937089	0.573824	0.472437	0.430368	0.66464	0.451403	0.568539	0.547504	0.558022	0.499454	0.509971	0.419798
NLGN1	NRXN3	DLG2	8.33333	3678.78	2.32756	0.871572	0	0.315996	0.941879	0.596169	0.526126	0.447127	0.682597	0.486627	0.604362	0.564862	0.584612	0.525744	0.545494	0.463511
NLGN1	DLG2	NLGN3	8	2816.08	1.92527	0.875296	0	0.27191	0.945903	0.493127	0.437823	0.369846	0.606321	0.403834	0.522072	0.488083	0.505078	0.445959	0.462953	0.427735
NLGN1	NLGN3	NRXN1	6	625.372	2.32505	0.875709	0	0.138595	0.94635	0.595525	0.481293	0.446644	0.683231	0.463968	0.582262	0.564938	0.5736	0.514453	0.523115	0.420118
NLGN1	DLG2	NRXN1	8.33333	3003.39	2.41229	0.880142	0	0.286314	0.95114	0.617871	0.534981	0.463403	0.701188	0.499192	0.618085	0.582295	0.60019	0.540744	0.558638	0.463831
SPON1	ADAMTS8	ADAMTSL3	3.33333	462	2.30009	0.877187	0	0.0820324	0.947947	0.589133	0.462358	0.44185	0.678836	0.452104	0.570597	0.560343	0.56547	0.506223	0.51135	0.404778
SPON1	ADAMTS8	SBSPON	3.33333	462	1.97125	0.823759	0	0.0820324	0.890209	0.504904	0.399186	0.378678	0.60123	0.388932	0.500208	0.489954	0.495081	0.439443	0.44457	0.369286
SPON1	ADAMTSL3	SBSPON	3.33333	462	2.00836	0.843853	0	0.0820324	0.911924	0.51441	0.406315	0.385807	0.613788	0.396061	0.510052	0.499798	0.504925	0.447929	0.453057	0.377092
PRKCD	ADCY5	GNAZ	12.6667	2812.74	1.53056	0.790957	1	0.358182	0.854761	0.392029	0.383567	0.377355	0.507712	0.380461	0.445639	0.442533	0.444086	0.411497	0.41305	0.484576
PRKCD	ADCY2	GNAZ	10.6667	1266.34	1.275	0.786643	1	0.253184	0.850099	0.32657	0.308224	0.328261	0.457453	0.318242	0.382838	0.392857	0.387848	0.35555	0.35054	0.440797
PRKCD	ADCY9	GNAZ	10.3333	911.585	0.856903	0.767967	1	0.23142	0.829916	0.219482	0.222467	0.247945	0.372091	0.235206	0.297279	0.310018	0.303648	0.272612	0.266242	0.403538
PRKCD	ADCY5	ADCY2	15	3132.25	1.83491	0.82305	2	0.415434	0.889442	0.469983	0.456346	0.519154	0.574848	0.48775	0.515597	0.547001	0.531299	0.517375	0.501673	0.610382
PRKCD	ADCY5	ADCY9	14.6667	2777.49	1.41681	0.804374	2	0.39367	0.86926	0.362895	0.370589	0.438838	0.489486	0.404713	0.430037	0.464162	0.4471	0.434438	0.417375	0.573123
PRKCD	ADCY2	ADCY9	12.6667	1231.09	1.16125	0.800059	2	0.288672	0.864597	0.297437	0.295246	0.389744	0.439227	0.342495	0.367236	0.414485	0.390861	0.37849	0.354866	0.529343
INPP5A	ITPKB	PLCD4	3	723.182	1.15493	0.772222	0	0.087338	0.834515	0.295817	0.243697	0.221863	0.430491	0.23278	0.337094	0.326177	0.331636	0.279478	0.284937	0.304417
LMOD1	TPM2	TPM1	17	1235.12	2.53218	0.815603	0	0.369096	0.881395	0.64858	0.578709	0.486435	0.706783	0.532572	0.642746	0.596609	0.619678	0.56459	0.587659	0.474768
LMOD1	TPM1	MYH11	17.6667	1350.16	2.9839	0.828073	0	0.386497	0.894871	0.764279	0.669834	0.57321	0.796927	0.621522	0.733381	0.685068	0.709225	0.653295	0.677451	0.511412
LMOD1	TPM1	CALD1	15.3333	728.197	2.41685	0.842612	0	0.315953	0.910583	0.619038	0.543267	0.464279	0.691924	0.503773	0.617596	0.578101	0.597849	0.540937	0.560684	0.461394
LMOD1	TPM1	MYL9	17.3333	1265.43	2.62557	0.834929	0	0.376601	0.90228	0.6725	0.598525	0.504375	0.729945	0.55145	0.664235	0.61716	0.640698	0.584305	0.607843	0.487845
LMOD1	TPM1	ACTG2	15.6667	850.906	2.99465	0.814421	0	0.327519	0.880118	0.767034	0.657155	0.575275	0.795305	0.616215	0.72623	0.68529	0.70576	0.650753	0.671223	0.493668
LMOD1	TPM3	TPM1	16.6667	1070.51	1.83231	0.804255	1	0.355689	0.869132	0.469317	0.44091	0.435321	0.569271	0.438116	0.50509	0.502296	0.503693	0.470206	0.471603	0.506868
LMOD1	ACTA2	TPM1	16	773.776	2.47691	0.838416	0	0.330302	0.906048	0.634421	0.558392	0.475816	0.702328	0.517104	0.63036	0.589072	0.609716	0.553088	0.573732	0.467693
LMOD1	TPM1	CNN1	13.3333	850.386	2.97019	0.824291	0	0.284286	0.890784	0.760769	0.641648	0.570577	0.793273	0.606112	0.71746	0.681925	0.699693	0.644019	0.661786	0.48396
LMOD1	TPM1	MYLK	15.6667	785.463	2.71584	0.837707	0	0.324643	0.905282	0.69562	0.602876	0.521715	0.748036	0.562295	0.675456	0.634875	0.655166	0.598585	0.618876	0.481386
LMOD1	TPM2	MYH11	16.6667	1268.87	3.27104	0.84669	0	0.364406	0.91499	0.837825	0.719471	0.628369	0.857116	0.67392	0.788294	0.742743	0.765518	0.708331	0.731107	0.529305
LMOD1	TPM2	CALD1	14.3333	646.909	2.70399	0.861229	0	0.293863	0.930702	0.692584	0.592904	0.519438	0.752113	0.556171	0.672509	0.635776	0.654142	0.595973	0.61434	0.479287
LMOD1	TPM2	MYL9	16.3333	1184.14	2.91271	0.853546	0	0.35451	0.922399	0.746046	0.648162	0.559534	0.790134	0.603848	0.719148	0.674834	0.696991	0.639341	0.661498	0.505739
LMOD1	TPM2	ACTG2	14.6667	769.618	3.28179	0.833038	0	0.305428	0.900236	0.84058	0.706792	0.630435	0.855494	0.668613	0.781143	0.742964	0.762054	0.705789	0.724878	0.511561
LMOD1	TPM2	TPM3	15.6667	989.225	2.11945	0.822872	1	0.333598	0.889251	0.542863	0.490547	0.490481	0.62946	0.490514	0.560003	0.55997	0.559987	0.525242	0.525259	0.524761
LMOD1	TPM2	ACTA2	15	692.489	2.76405	0.857033	0	0.308211	0.926167	0.707967	0.608028	0.530975	0.762517	0.569502	0.685273	0.646746	0.66601	0.608124	0.627387	0.485586
LMOD1	TPM2	MYLK	14.6667	704.175	3.00298	0.856324	0	0.302552	0.925401	0.769166	0.652513	0.576875	0.808225	0.614694	0.730369	0.69255	0.711459	0.653622	0.672531	0.49928
LMOD1	MYH11	CALD1	15	761.951	3.1557	0.8737	0	0.311264	0.944178	0.808284	0.684029	0.606213	0.842257	0.645121	0.763143	0.724235	0.743689	0.684678	0.704132	0.515932
LMOD1	MYH11	MYL9	17	1299.19	3.36443	0.866017	0	0.371912	0.935875	0.861746	0.739287	0.646309	0.880278	0.692798	0.809783	0.763294	0.786538	0.728046	0.75129	0.542383
LMOD1	MYH11	ACTG2	15.3333	884.66	3.73351	0.845508	0	0.32283	0.913713	0.95628	0.797917	0.71721	0.945638	0.757563	0.871778	0.831424	0.851601	0.794494	0.81467	0.548206
LMOD1	TPM3	MYH11	16.3333	1104.27	2.57116	0.835343	1	0.351	0.902727	0.658563	0.581672	0.577255	0.719604	0.579464	0.650638	0.64843	0.649534	0.613947	0.615051	0.561406
LMOD1	ACTA2	MYH11	15.6667	807.531	3.21576	0.869504	0	0.325613	0.939644	0.823667	0.699154	0.61775	0.852661	0.658452	0.775907	0.735206	0.755557	0.696829	0.71718	0.522231
LMOD1	CNN1	MYH11	13	884.14	3.70905	0.855378	0	0.279597	0.924379	0.950015	0.78241	0.712511	0.943606	0.747461	0.863008	0.828058	0.845533	0.787759	0.805234	0.538498
LMOD1	MYLK	MYH11	15.3333	819.217	3.45469	0.868794	0	0.319954	0.938877	0.884866	0.743638	0.663649	0.898369	0.703644	0.821003	0.781009	0.801006	0.742326	0.762323	0.535924
LMOD1	MYL9	CALD1	14.6667	677.224	2.79738	0.880556	0	0.301368	0.951587	0.716504	0.61272	0.537378	0.775275	0.575049	0.693998	0.656327	0.675162	0.615688	0.634523	0.492365
LMOD1	ACTG2	CALD1	13	262.699	3.16646	0.860047	0	0.252286	0.929425	0.811038	0.67135	0.608279	0.840635	0.639814	0.755993	0.724457	0.740225	0.682136	0.697904	0.498187
LMOD1	TPM3	CALD1	14	482.305	2.00411	0.849882	1	0.280456	0.918439	0.513322	0.455105	0.468324	0.614601	0.461715	0.534853	0.541463	0.538158	0.501589	0.498284	0.511387
LMOD1	ACTA2	CALD1	13.3333	185.569	2.64871	0.884043	0	0.255069	0.955355	0.678426	0.572587	0.508819	0.747658	0.540703	0.660122	0.628239	0.644181	0.584471	0.600413	0.472213
LMOD1	MYLK	CALD1	13	197.256	2.88764	0.883333	0	0.24941	0.954589	0.739625	0.617071	0.554718	0.793366	0.585895	0.705218	0.674042	0.68963	0.629968	0.645556	0.485906
LMOD1	MYL9	ACTG2	15	799.933	3.37518	0.852364	0	0.312933	0.921122	0.8645	0.726608	0.648375	0.878655	0.687492	0.802632	0.763515	0.783074	0.725504	0.745062	0.524639
LMOD1	TPM3	MYL9	16	1019.54	2.21284	0.842199	1	0.341103	0.910136	0.566783	0.510363	0.508421	0.652622	0.509392	0.581492	0.580521	0.581007	0.544957	0.545442	0.537839
LMOD1	ACTA2	MYL9	15.3333	722.804	2.85744	0.876359	0	0.315716	0.947052	0.731888	0.627845	0.548916	0.785679	0.58838	0.706762	0.667297	0.68703	0.627839	0.647571	0.498664
LMOD1	MYLK	MYL9	15	734.49	3.09637	0.87565	0	0.310057	0.946286	0.793086	0.672329	0.594815	0.831386	0.633572	0.751858	0.713101	0.732479	0.673336	0.692715	0.512357
LMOD1	TPM3	ACTG2	14.3333	605.014	2.58191	0.82169	1	0.292021	0.887973	0.661317	0.568993	0.579321	0.717981	0.574157	0.643487	0.648651	0.646069	0.611404	0.608822	0.543661
LMOD1	ACTA2	ACTG2	13.6667	308.278	3.22652	0.855851	0	0.266635	0.92489	0.826422	0.686475	0.619816	0.851039	0.653146	0.768757	0.735427	0.752092	0.694287	0.710951	0.504487
LMOD1	CNN1	ACTG2	11	384.888	3.7198	0.841726	0	0.220619	0.909625	0.952769	0.769732	0.714577	0.941983	0.742154	0.855857	0.82828	0.842069	0.785217	0.799006	0.520753
LMOD1	MYLK	ACTG2	13.3333	319.965	3.46545	0.855142	0	0.260975	0.924123	0.88762	0.730959	0.665715	0.896746	0.698337	0.813853	0.781231	0.797542	0.739784	0.756095	0.51818
LMOD1	ACTA2	TPM3	14.6667	527.885	2.06417	0.845686	1	0.294804	0.913904	0.528705	0.47023	0.479862	0.625005	0.475046	0.547617	0.552433	0.550025	0.51374	0.511332	0.517687
LMOD1	TPM3	MYLK	14.3333	539.571	2.3031	0.844976	1	0.289145	0.913138	0.589904	0.514714	0.525761	0.670712	0.520237	0.592713	0.598237	0.595475	0.559237	0.556475	0.53138
LMOD1	ACTA2	CNN1	11.3333	307.759	3.20206	0.865721	0	0.223402	0.935556	0.820157	0.670968	0.615117	0.849006	0.643043	0.759987	0.732062	0.746025	0.687552	0.701515	0.494779
LMOD1	ACTA2	MYLK	13.6667	242.835	2.9477	0.879137	0	0.263759	0.950054	0.755008	0.632196	0.566256	0.803769	0.599226	0.717983	0.685013	0.701498	0.642119	0.658604	0.492205
LAMA4	ITGA8	ITGA7	12.6667	1047.14	1.86667	0.844917	1	0.280588	0.913074	0.478119	0.428736	0.441922	0.586857	0.435329	0.507797	0.51439	0.511093	0.474859	0.471563	0.501278
LAMA4	ITGA8	ITGB3	17.6667	3506	1.49443	0.828073	1	0.481242	0.894871	0.382776	0.407392	0.370415	0.5108	0.388904	0.459096	0.440607	0.449852	0.414756	0.424	0.523056
LAMA4	ITGA8	ITGA1	15.6667	2900.56	1.5129	0.833629	1	0.417598	0.900875	0.387506	0.395029	0.373963	0.515848	0.384496	0.455439	0.444906	0.450172	0.414701	0.419967	0.509828
LAMA4	ITGA8	LAMB2	12	1173.69	1.32417	0.810579	2	0.273804	0.875966	0.339166	0.322825	0.421041	0.473366	0.371933	0.398096	0.447203	0.42265	0.409568	0.385014	0.538901
LAMA4	ITGA8	ITGA9	12.6667	994.346	1.78161	0.854196	1	0.278268	0.923101	0.456332	0.411816	0.425582	0.573024	0.418699	0.49242	0.499303	0.495862	0.459001	0.45556	0.497759
LAMA4	HSPG2	DMD	15	5145.84	1.5211	0.848227	1	0.503928	0.916651	0.389606	0.418186	0.375537	0.521367	0.396862	0.469776	0.448452	0.459114	0.422657	0.433319	0.535879
LAMA4	DMD	ITGA1	17.3333	5032.65	1.58658	0.85727	1	0.542163	0.926423	0.406377	0.440324	0.388116	0.536388	0.41422	0.488356	0.462252	0.475304	0.438236	0.451288	0.552074
LAMA4	DMD	LAMB2	13.6667	3305.78	1.39785	0.83422	2	0.398369	0.901514	0.358037	0.36812	0.435194	0.493906	0.401657	0.431013	0.46455	0.447782	0.433104	0.416335	0.581147
LAMA4	ITGA7	ITGB3	16	3327.78	1.57617	0.85727	1	0.442546	0.926423	0.403711	0.41342	0.386116	0.534389	0.399768	0.473904	0.460253	0.467078	0.43001	0.436836	0.526503
LAMA4	ITGA7	LAMB2	10.3333	995.481	1.40591	0.839775	2	0.235108	0.907517	0.360101	0.328853	0.436742	0.496955	0.382797	0.412904	0.466849	0.439876	0.424823	0.397851	0.542348
LAMA4	HSPG2	LAMB2	11	2962.1	0.986657	0.819444	2	0.333882	0.885546	0.252717	0.273008	0.356204	0.410924	0.314606	0.341966	0.383564	0.362765	0.349085	0.328286	0.534703
LAMA4	ITGA1	ITGB3	19	5181.21	1.2224	0.845981	1	0.579556	0.914224	0.313098	0.379713	0.318157	0.46338	0.348935	0.421546	0.390768	0.406157	0.369852	0.38524	0.535053
LAMA4	LAMB2	ITGB3	15.3333	3454.34	1.03367	0.822931	2	0.435762	0.889315	0.264758	0.307509	0.365235	0.420897	0.336372	0.364203	0.393066	0.378635	0.364719	0.350288	0.564125
LAMA4	ITGA9	ITGB3	16	3274.99	1.49111	0.866548	1	0.440226	0.93645	0.381924	0.3965	0.369777	0.520556	0.383138	0.458528	0.445166	0.451847	0.414152	0.420833	0.522983
LAMA4	ITGA1	LAMB2	13.3333	2848.9	1.05214	0.828487	2	0.372118	0.895318	0.269488	0.295146	0.368783	0.425946	0.331964	0.360546	0.397364	0.378955	0.364664	0.346255	0.550898
LAMA4	ITGA9	ITGA1	14	2669.56	1.50958	0.872104	1	0.376581	0.942454	0.386655	0.384136	0.373324	0.525604	0.37873	0.45487	0.449464	0.452167	0.414097	0.4168	0.509756
LAMA4	PRNP	LAMB2	11	2956.01	0.948901	0.820449	2	0.333615	0.886632	0.243046	0.265688	0.348951	0.403943	0.30732	0.334816	0.376447	0.355631	0.341884	0.321068	0.53249
LAMA4	LAMB2	HGF	10.3333	1263.8	1.14848	0.834102	3	0.246899	0.901386	0.294164	0.282348	0.470623	0.44597	0.376486	0.364159	0.458296	0.411228	0.417391	0.370322	0.610612
SHC2	GAB1	KIT	7.33333	1228.75	0.929898	0.776359	1	0.189804	0.838986	0.238179	0.226085	0.261967	0.388381	0.244026	0.307233	0.325174	0.316203	0.2846	0.275629	0.400075
SHC2	ABL1	SORBS2	7.33333	4021.34	0.969878	0.762352	1	0.312533	0.823849	0.248419	0.264448	0.269648	0.392276	0.267048	0.328362	0.330962	0.329662	0.299005	0.297705	0.429534
ITGA8	COL4A6	ITGB3	16	3331.88	1.92278	0.772281	1	0.442726	0.834579	0.49249	0.480049	0.4527	0.578012	0.466375	0.52903	0.515356	0.522193	0.490865	0.497702	0.525782
ITGA8	ITGA1	COL4A6	14	2726.45	1.94125	0.777837	1	0.379082	0.840582	0.49722	0.467685	0.456248	0.583061	0.461967	0.525373	0.519654	0.522514	0.490811	0.49367	0.512554
ITGA8	COL4A6	COL4A5	9.33333	757.815	2.04898	0.738357	2	0.206144	0.797918	0.524814	0.445147	0.560277	0.59309	0.502712	0.519118	0.576684	0.547901	0.539698	0.510915	0.548886
ITGA8	ITGB3	JAM2	15.6667	2869.21	1.8326	0.838948	0	0.41622	0.906623	0.469392	0.456099	0.352044	0.5787	0.404072	0.517399	0.465372	0.491386	0.434722	0.460735	0.448059
ITGA8	ITGA9	JAM2	10.6667	357.565	2.11978	0.865071	0	0.213245	0.934853	0.542949	0.460523	0.407211	0.640925	0.433867	0.550724	0.524068	0.537396	0.478968	0.492295	0.422762
ITGA8	JAM3	JAM2	9.33333	1512.95	2.0598	0.879787	0	0.239331	0.950757	0.527587	0.455523	0.39569	0.633379	0.425606	0.544451	0.514535	0.529493	0.470071	0.485029	0.429419
ITGA8	ITGA1	JAM2	13.6667	2263.78	1.85107	0.844504	0	0.352575	0.912627	0.474122	0.443736	0.355592	0.583749	0.399664	0.513742	0.46967	0.491706	0.434667	0.456703	0.434831
ITGA8	ITGB3	TNXB	15	2869.21	2.05304	0.824764	0	0.403874	0.891295	0.525855	0.49536	0.394391	0.617215	0.444876	0.556287	0.505803	0.531045	0.475339	0.500581	0.455256
ITGA8	ITGA9	ITGB3	17.6667	2932.49	1.79299	0.831324	0	0.456038	0.898384	0.459247	0.458444	0.344435	0.569031	0.40144	0.513738	0.456733	0.485235	0.429086	0.457589	0.453417
ITGA8	ITGB3	JAM3	16.3333	4087.88	1.73302	0.84604	0	0.482124	0.914288	0.443885	0.453445	0.332914	0.561486	0.393179	0.507465	0.4472	0.477332	0.420189	0.450322	0.460074
ITGA8	ITGB3	COL6A2	16	3023.97	1.56803	0.83552	0	0.429194	0.902919	0.401627	0.408519	0.301221	0.52695	0.35487	0.467735	0.414085	0.44091	0.384478	0.411302	0.433435
ITGA8	ITGA7	ITGB3	17.6667	2985.29	1.87805	0.822045	0	0.458358	0.888357	0.481033	0.475364	0.360775	0.582864	0.41807	0.529114	0.471819	0.500467	0.444944	0.473592	0.456937
ITGA8	TLN1	ITGB3	21.3333	3955	1.51022	0.819208	0	0.568876	0.885291	0.38682	0.432334	0.290115	0.511438	0.361225	0.471886	0.400777	0.436331	0.381001	0.416555	0.460247
ITGA8	ITGA1	ITGB3	20.6667	4838.71	1.52428	0.810757	0	0.595368	0.876158	0.39042	0.441657	0.292815	0.511855	0.367236	0.476756	0.402335	0.439546	0.384786	0.421996	0.465487
ITGA8	LAMB2	ITGB3	17	3111.84	1.33555	0.787707	1	0.451574	0.851249	0.34208	0.369454	0.339894	0.469372	0.354674	0.419413	0.404633	0.412023	0.379653	0.387043	0.494559
ITGA8	PARVA	ITGB3	17	2912.87	1.48503	0.817612	0	0.44283	0.883566	0.380367	0.395983	0.285275	0.506167	0.340629	0.451075	0.395721	0.423398	0.368175	0.395852	0.426691
ITGA8	ITGB3	TNC	15.3333	2869.26	1.79373	0.810047	0	0.410049	0.875391	0.459435	0.447088	0.344576	0.563424	0.395832	0.505256	0.454	0.479628	0.424916	0.450544	0.436219
ITGA8	ITGB3	COL4A5	16	2870.08	1.63201	0.771277	1	0.422431	0.833493	0.418015	0.419119	0.396844	0.521884	0.407982	0.470502	0.459364	0.464933	0.433673	0.439242	0.501818
ITGA8	ITGA9	TNXB	10	357.565	2.34022	0.850887	0	0.200899	0.919525	0.599411	0.499783	0.449559	0.67944	0.474671	0.589612	0.564499	0.577055	0.519585	0.532141	0.429959
ITGA8	ITGA9	JAM3	11.3333	1576.23	2.02019	0.872163	0	0.279149	0.942518	0.517441	0.457868	0.388081	0.62371	0.422975	0.540789	0.505896	0.523343	0.464435	0.481882	0.434777
ITGA8	ITGA9	COL6A2	11	512.316	1.85521	0.861643	0	0.226219	0.931149	0.475184	0.412943	0.356388	0.589175	0.384665	0.501059	0.472782	0.48692	0.428723	0.442862	0.408138
ITGA8	ITGA9	TLN1	16.3333	1443.35	1.7974	0.845331	0	0.365902	0.913521	0.460377	0.436758	0.345283	0.573663	0.39102	0.50521	0.459473	0.482342	0.425246	0.448115	0.43495
ITGA8	ITGA9	ITGA1	15.6667	2327.06	1.81146	0.836879	0	0.392393	0.904388	0.463977	0.446081	0.347983	0.57408	0.397032	0.51008	0.461031	0.485556	0.429032	0.453556	0.44019
ITGA8	ITGA9	TNC	10.3333	357.613	2.0809	0.83617	0	0.207074	0.903621	0.532991	0.451512	0.399744	0.625649	0.425628	0.53858	0.512696	0.525638	0.469162	0.482104	0.410922
ITGA8	ITGA9	COL4A5	11	358.427	1.91919	0.7974	1	0.219456	0.861723	0.491571	0.423542	0.452012	0.584109	0.437777	0.503826	0.518061	0.510943	0.477919	0.470802	0.476521
ITGA8	ITGA1	JAM3	14.3333	3482.45	1.75148	0.851596	0	0.418479	0.920291	0.448615	0.441081	0.336461	0.566534	0.388771	0.503808	0.451498	0.477653	0.420135	0.44629	0.446846
ITGA8	ITGA7	COL6A2	11	565.11	1.94027	0.852364	0	0.228539	0.921122	0.49697	0.429863	0.372728	0.603008	0.401295	0.516435	0.487868	0.502152	0.444582	0.458865	0.411658
ITGA8	ITGA1	COL6A2	14	2418.53	1.5865	0.841076	0	0.365549	0.908923	0.406358	0.396156	0.304768	0.531999	0.350462	0.464077	0.418384	0.44123	0.384423	0.40727	0.420207
ITGA8	TLN1	ITGA7	16.3333	1496.14	1.88246	0.836052	0	0.368222	0.903494	0.482163	0.453678	0.361622	0.587496	0.40765	0.520587	0.474559	0.497573	0.441105	0.464118	0.43847
ITGA8	ITGA7	LAMB2	12	652.986	1.70779	0.804551	1	0.25092	0.869451	0.437423	0.390797	0.411401	0.54543	0.401099	0.468114	0.478415	0.473265	0.439757	0.434606	0.472782
ITGA8	PARVA	ITGA7	12	454.018	1.85727	0.834456	0	0.242175	0.901769	0.47571	0.417326	0.356782	0.582225	0.387054	0.499775	0.469503	0.484639	0.428279	0.443415	0.404914
ITGA8	ITGA7	TNC	10.3333	410.406	2.16596	0.826891	0	0.209395	0.893594	0.554778	0.468432	0.416083	0.639482	0.442258	0.553957	0.527783	0.54087	0.48502	0.498107	0.414442
ITGA8	ITGA7	COL4A5	11	411.221	2.00425	0.788121	1	0.221776	0.851696	0.513358	0.440462	0.468352	0.597942	0.454407	0.519202	0.533147	0.526175	0.493777	0.486805	0.480041
ITGA8	TLN1	ITGA1	19.3333	3349.56	1.52869	0.824764	0	0.505232	0.891295	0.391551	0.419971	0.293663	0.516487	0.356817	0.468229	0.405075	0.436652	0.380946	0.412523	0.447019
ITGA8	ITGA1	LAMB2	15	2506.41	1.35402	0.793262	1	0.38793	0.857252	0.346811	0.35709	0.343441	0.474421	0.350266	0.415756	0.408931	0.412343	0.379599	0.383011	0.481332
ITGA8	ITGA1	COL4A5	14	2264.64	1.65048	0.776832	1	0.358786	0.839497	0.422745	0.406755	0.400392	0.526933	0.403574	0.466844	0.463663	0.465253	0.433618	0.435209	0.48859
KCNIP3	KCND3	DPP6	4.66667	479.011	1.96766	0.786052	0	0.107471	0.84946	0.503985	0.404856	0.377988	0.590354	0.391422	0.497605	0.484171	0.490888	0.437797	0.444514	0.365229
PBX1	MEIS1	MAB21L1	5	2542	1.43992	0.850325	0	0.204309	0.918918	0.368813	0.327687	0.27661	0.506339	0.302148	0.417013	0.391474	0.404244	0.346811	0.359581	0.37301
PBX1	MEIS1	MAB21L2	4	1774	1.7289	0.830201	0	0.152038	0.897171	0.442832	0.370133	0.332124	0.556417	0.351129	0.463275	0.44427	0.453773	0.397699	0.407202	0.37301
ITGA9	ITGB3	JAM2	14	2638.21	1.82928	0.877423	0	0.375204	0.948202	0.468541	0.445206	0.351405	0.588456	0.398306	0.516831	0.469931	0.493381	0.434118	0.457569	0.447987
ITGA9	ITGA1	JAM2	12	2032.78	1.84774	0.882979	0	0.311559	0.954206	0.473271	0.432843	0.354953	0.593505	0.393898	0.513174	0.474229	0.493701	0.434064	0.453536	0.434759
ITGA9	JAM3	JAM2	7.66667	1281.95	2.05648	0.918262	0	0.198314	0.992336	0.526735	0.44463	0.395052	0.643136	0.419841	0.543883	0.519094	0.531488	0.469467	0.481862	0.429346
ITGA9	ITGB3	COL6A2	14.3333	2792.96	1.56471	0.873995	0	0.388177	0.944498	0.400776	0.397626	0.300582	0.536706	0.349104	0.467166	0.418644	0.442905	0.383874	0.408135	0.433363
ITGA9	ITGA1	COL6A2	12.3333	2187.53	1.58318	0.879551	0	0.324533	0.950501	0.405506	0.385263	0.30413	0.541755	0.344696	0.463509	0.422942	0.443226	0.383819	0.404103	0.420135
ITGA9	TLN1	ITGB3	19.6667	3723.99	1.5069	0.857683	0	0.52786	0.92687	0.385969	0.421442	0.289477	0.521194	0.355459	0.471318	0.405335	0.438327	0.380397	0.413388	0.460175
ITGA9	TLN1	ITGA1	17.6667	3118.56	1.52537	0.863239	0	0.464215	0.932873	0.390699	0.409078	0.293024	0.526243	0.351051	0.46766	0.409634	0.438647	0.380342	0.409356	0.446947
ITGA9	ITGA1	ITGB3	19	4607.71	1.52096	0.849232	0	0.554352	0.917736	0.389569	0.430765	0.292177	0.521611	0.361471	0.476188	0.406894	0.441541	0.384182	0.418829	0.465414
ITGA9	ITGB3	TNXB	13.3333	2638.21	2.04972	0.863239	0	0.362858	0.932873	0.525004	0.484467	0.393753	0.626971	0.43911	0.555719	0.510362	0.53304	0.474736	0.497415	0.455184
ITGA9	ITGB3	TNC	13.6667	2638.26	1.7904	0.848522	0	0.369033	0.91697	0.458583	0.436196	0.343938	0.57318	0.390067	0.504688	0.458559	0.481623	0.424313	0.447377	0.436147
ITGA9	ITGB3	JAM3	14.6667	3856.88	1.72969	0.884515	0	0.441107	0.955866	0.443034	0.442552	0.332275	0.571242	0.387414	0.506897	0.451758	0.479328	0.419586	0.447155	0.460002
ITGA9	ITGB3	COL4A5	14.3333	2639.07	1.62869	0.809752	1	0.381414	0.875072	0.417163	0.408226	0.396206	0.531641	0.402216	0.469933	0.463923	0.466928	0.43307	0.436075	0.501746
ITGA9	ITGA1	JAM3	12.6667	3251.44	1.74816	0.890071	0	0.377463	0.96187	0.447764	0.430189	0.335823	0.57629	0.383006	0.50324	0.456057	0.479648	0.419531	0.443123	0.446774
ITGA9	ITGA1	COL4A5	12.3333	2033.64	1.64716	0.815307	1	0.31777	0.881076	0.421894	0.395863	0.399754	0.536689	0.397808	0.466276	0.468221	0.467249	0.433015	0.432042	0.488518
MAOB	ALDH1B1	AOC3	3.33333	665.517	1.5579	0.806738	0	0.0909766	0.871815	0.399032	0.322018	0.299274	0.517227	0.310646	0.419623	0.40825	0.413936	0.359448	0.365134	0.340456
MAOB	ALDH1B1	ADH1B	4.33333	909.448	1.80039	0.795065	0	0.120215	0.8592	0.461142	0.37591	0.345856	0.560656	0.360883	0.468283	0.453256	0.46077	0.40707	0.414583	0.360139
RBFOX2	RBPMS2	RBPMS	3.33333	2011.89	1.68042	0.826241	0	0.150147	0.892891	0.430414	0.360347	0.322811	0.546034	0.341579	0.45319	0.434422	0.443806	0.388001	0.397385	0.368363
RBFOX2	RBPMS2	RBM24	3.66667	2240.58	1.93105	0.850591	0	0.166371	0.919205	0.494608	0.412549	0.370956	0.600757	0.391752	0.506653	0.485857	0.496255	0.438804	0.449203	0.395046
PARVA	ILK	LIMS2	8.66667	851.819	1.56785	0.858511	0	0.19793	0.927764	0.40158	0.350668	0.301185	0.533126	0.325927	0.441897	0.417156	0.429526	0.371541	0.383912	0.381819
PARVA	TNS1	VCL	17.3333	3376.09	1.53571	0.828369	0	0.46936	0.895191	0.393347	0.41235	0.29501	0.518808	0.35368	0.465579	0.406909	0.436244	0.380295	0.40963	0.439475
PARVA	TNS1	ITGB3	15	2669.49	1.68033	0.857801	0	0.395097	0.926998	0.430392	0.421568	0.322794	0.554543	0.372181	0.488055	0.438668	0.463362	0.405425	0.430118	0.438121
PARVA	ILK	TNS1	11.3333	902.718	1.64904	0.866312	0	0.249549	0.936195	0.422375	0.379169	0.316781	0.55083	0.347975	0.464999	0.433806	0.449403	0.39089	0.406487	0.40203
PARVA	TGFB1I1	TNS1	8	139.696	1.9015	0.880496	0	0.154288	0.951523	0.48704	0.403852	0.36528	0.603161	0.384566	0.503506	0.48422	0.493863	0.434393	0.444036	0.398213
PARVA	ITGB3	VCL	22.6667	5900.12	1.0499	0.800532	0	0.679052	0.865108	0.268914	0.371449	0.201686	0.417963	0.286567	0.394706	0.309824	0.352265	0.298196	0.340637	0.453269
PARVA	VCL	FERMT2	15.3333	3325.19	1.34972	0.837943	0	0.430086	0.905537	0.345709	0.366804	0.259282	0.485666	0.313043	0.426235	0.372474	0.399355	0.342758	0.369639	0.420333
PARVA	ILK	VCL	19	4133.35	1.0186	0.809043	0	0.533505	0.874305	0.260898	0.32905	0.195673	0.41425	0.262362	0.37165	0.304962	0.338306	0.283662	0.317006	0.417177
PARVA	TGFB1I1	VCL	15.6667	3370.33	1.27106	0.823227	0	0.438243	0.889634	0.325563	0.353733	0.244172	0.46658	0.298952	0.410157	0.355376	0.382766	0.327164	0.354554	0.41336
PARVA	ITGA7	ITGB3	15.3333	2734.66	1.56676	0.846809	0	0.404134	0.915118	0.401302	0.40201	0.300976	0.529756	0.351493	0.465883	0.415366	0.440624	0.38343	0.408688	0.430138
PARVA	ITGB3	FERMT2	13	2618.59	1.49435	0.867376	0	0.355823	0.937344	0.382754	0.376021	0.287065	0.521402	0.331543	0.448711	0.404233	0.426472	0.367888	0.390127	0.41898
PARVA	ILK	ITGB3	16.6667	3426.75	1.16323	0.838475	0	0.459241	0.906112	0.297943	0.338267	0.223457	0.449985	0.280862	0.394126	0.336721	0.365424	0.308791	0.337494	0.415824
PARVA	ILK	FERMT2	9.33333	851.819	1.46305	0.875887	0	0.210275	0.946541	0.374738	0.333622	0.281053	0.517689	0.307338	0.425655	0.399371	0.412513	0.353354	0.366496	0.382889
PARVA	ILK	TGFB1I1	9.66667	896.957	1.38439	0.86117	0	0.218432	0.930638	0.354591	0.320551	0.265943	0.498603	0.293247	0.409577	0.382273	0.395925	0.33776	0.351412	0.375915
OGN	OMD	PRELP	3.33333	462	3.20781	0.923404	0	0.0820324	0.997892	0.82163	0.636731	0.616223	0.865696	0.626477	0.751213	0.740959	0.746086	0.683718	0.688845	0.475389
OGN	ST3GAL3	OMD	3	0	2.69408	0.910343	0	0.0555556	0.983777	0.690045	0.531423	0.517534	0.763478	0.524479	0.647451	0.640506	0.643978	0.582492	0.585965	0.432345
OGN	ST3GAL3	PRELP	3.33333	462	2.61996	0.90857	0	0.0820324	0.981861	0.671061	0.523804	0.503296	0.748761	0.51355	0.636283	0.626028	0.631155	0.569789	0.574916	0.433739
TPM2	TPM1	MYH11	20.6667	1921.22	2.71658	0.808924	0	0.46715	0.874178	0.69581	0.638645	0.521858	0.740402	0.580252	0.689524	0.63113	0.660327	0.605691	0.634888	0.509285
TPM2	TPM1	CALD1	18.3333	1299.26	2.14953	0.823463	0	0.396606	0.88989	0.550569	0.512078	0.412927	0.635399	0.462503	0.573739	0.524163	0.548951	0.493333	0.518121	0.459266
TPM2	TPM1	VCL	24.6667	4512.75	1.67467	0.767849	0	0.655117	0.829789	0.428941	0.485485	0.321706	0.529153	0.403596	0.507319	0.425429	0.466374	0.414513	0.455457	0.478462
TPM2	TPM1	MYL9	20.3333	1836.49	2.35826	0.81578	0	0.457254	0.881587	0.604031	0.567337	0.453023	0.67342	0.51018	0.620378	0.563222	0.5918	0.536701	0.565279	0.485718
TPM2	TPM1	ACTG2	18.6667	1421.97	2.72734	0.795272	0	0.408172	0.859424	0.698565	0.625967	0.523924	0.73878	0.574945	0.682373	0.631352	0.656862	0.603148	0.628659	0.49154
TPM2	ACTA2	TPM1	19	1344.84	2.20959	0.819267	0	0.410955	0.885355	0.565952	0.527203	0.424464	0.645803	0.475834	0.586503	0.535134	0.560818	0.505484	0.531168	0.465566
TPM2	TPM1	MYLK	18.6667	1356.52	2.44852	0.818558	0	0.405296	0.884588	0.627151	0.571687	0.470363	0.69151	0.521025	0.631599	0.580937	0.606268	0.550981	0.576312	0.479259
TPM2	TPM1	DMD	20.6667	3657.59	2.18348	0.80857	0	0.54346	0.873794	0.559265	0.555314	0.419449	0.637897	0.487381	0.596605	0.528673	0.562639	0.508027	0.541993	0.49413
TPM2	TPM1	ACTN1	21	2999.56	1.79471	0.785579	0	0.520714	0.848949	0.459686	0.474943	0.344765	0.557002	0.409854	0.515973	0.450883	0.483428	0.430369	0.462913	0.457337
TPM2	TPM1	TMOD1	15.3333	1236.44	2.24807	0.804374	0	0.33829	0.86926	0.575807	0.516428	0.431856	0.64917	0.474142	0.582799	0.540513	0.561656	0.507327	0.52847	0.445839
TPM2	TPM3	TPM1	19.6667	1641.57	1.56499	0.785106	1	0.436342	0.848438	0.400848	0.409722	0.383969	0.512746	0.396845	0.461234	0.448358	0.454796	0.422602	0.42904	0.50474
TPM2	ACTN2	TPM1	20.6667	2907.04	2.81567	0.797695	0	0.510475	0.862043	0.721191	0.668512	0.540893	0.756404	0.604703	0.712458	0.648649	0.680553	0.626676	0.65858	0.523427
TPM2	ACTC1	TPM1	16.6667	1270.13	1.87129	0.758924	0	0.364462	0.820144	0.479302	0.450592	0.359476	0.564512	0.405034	0.507552	0.461994	0.484773	0.433514	0.456293	0.415977
TPM2	TPM1	MYL6	18.6667	1482.13	1.53175	0.739598	0	0.410816	0.799259	0.392334	0.396954	0.29425	0.494065	0.345602	0.44551	0.394158	0.419834	0.36988	0.395556	0.400602
TPM2	MYH11	CALD1	18	1333.01	2.88838	0.854551	0	0.391917	0.923485	0.739815	0.65284	0.554861	0.785732	0.603851	0.719286	0.670297	0.694791	0.637074	0.661568	0.513804
TPM2	MYH11	VCL	24.3333	4546.5	2.41353	0.798936	0	0.650427	0.863384	0.618187	0.626247	0.46364	0.679486	0.544944	0.652867	0.571563	0.612215	0.558253	0.598905	0.533
TPM2	MYH11	MYL9	20	1870.25	3.09711	0.846868	0	0.452564	0.915182	0.793277	0.708099	0.594957	0.823753	0.651528	0.765926	0.709355	0.73764	0.680442	0.708727	0.540256
TPM2	MYH11	ACTG2	18.3333	1455.72	3.46619	0.826359	0	0.403482	0.893019	0.887811	0.766729	0.665858	0.889113	0.716293	0.827921	0.777485	0.802703	0.746889	0.772107	0.546078
TPM2	ACTA2	MYH11	18.6667	1378.59	2.94844	0.850355	0	0.406266	0.91895	0.755198	0.667965	0.566399	0.796136	0.617182	0.732051	0.681267	0.706659	0.649225	0.674616	0.520103
TPM2	MYLK	MYH11	18.3333	1390.28	3.18738	0.849645	0	0.400606	0.918184	0.816397	0.712449	0.612298	0.841844	0.662373	0.777146	0.727071	0.752108	0.694722	0.71976	0.533797
TPM2	TPM3	MYH11	19.3333	1675.33	2.30384	0.816194	1	0.431652	0.882034	0.590094	0.550483	0.525904	0.663079	0.538194	0.606781	0.594491	0.600636	0.566342	0.572487	0.559278
TPM2	ACTC1	MYH11	16.3333	1303.89	2.61014	0.790012	0	0.359772	0.85374	0.668548	0.591354	0.501411	0.714846	0.546382	0.6531	0.608128	0.630614	0.577255	0.599741	0.470515
TPM2	MYL6	MYH11	18.3333	1515.88	2.2706	0.770686	0	0.406126	0.832854	0.581579	0.537716	0.436185	0.644398	0.48695	0.591057	0.540291	0.565674	0.513621	0.539004	0.45514
TPM2	MYH11	TAGLN	16.6667	1611.88	3.06731	0.847931	0	0.379481	0.916331	0.785643	0.684103	0.589232	0.818315	0.636667	0.751209	0.703774	0.727491	0.670221	0.693938	0.520364
TPM2	VCL	CALD1	22	3924.54	1.84647	0.813475	0	0.579883	0.879096	0.472946	0.49968	0.354709	0.574483	0.427195	0.537082	0.464596	0.500839	0.445895	0.482138	0.482981
TPM2	MYL9	CALD1	17.6667	1248.29	2.53006	0.861407	0	0.38202	0.930894	0.648035	0.581532	0.486027	0.71875	0.533779	0.650141	0.602388	0.626264	0.568084	0.59196	0.490237
TPM2	ACTG2	CALD1	16	833.76	2.89914	0.840898	0	0.332938	0.908731	0.742569	0.640162	0.556927	0.78411	0.598544	0.712136	0.670518	0.691327	0.634531	0.65534	0.49606
TPM2	ACTA2	CALD1	16.3333	756.63	2.38139	0.864894	0	0.335722	0.934662	0.609957	0.541398	0.457468	0.691133	0.499433	0.616266	0.5743	0.595283	0.536867	0.557849	0.470085
TPM2	MYLK	CALD1	16	768.317	2.62033	0.864184	0	0.330062	0.933895	0.671156	0.585882	0.503367	0.736841	0.544624	0.661361	0.620104	0.640732	0.582364	0.602993	0.483778
TPM2	TPM3	CALD1	17	1053.37	1.73679	0.830733	1	0.361108	0.897745	0.444853	0.423916	0.416973	0.558076	0.420445	0.490996	0.487524	0.48926	0.453984	0.45572	0.50926
TPM2	MYL6	CALD1	16	893.918	1.70355	0.785225	0	0.335582	0.848566	0.436338	0.411149	0.327254	0.539395	0.369201	0.475272	0.433324	0.454298	0.401263	0.422237	0.405122
TPM2	TAGLN	CALD1	14.3333	989.918	2.50026	0.86247	0	0.308937	0.932043	0.640402	0.557536	0.480301	0.713312	0.518919	0.635424	0.596807	0.616115	0.557863	0.577171	0.470346
TPM2	VCL	MYL9	24	4461.77	2.0552	0.805792	0	0.640531	0.870793	0.526407	0.554938	0.394806	0.612504	0.474872	0.583721	0.503655	0.543688	0.489263	0.529296	0.509433
TPM2	VCL	ACTG2	22.3333	4047.25	2.42428	0.785284	0	0.591449	0.84863	0.620941	0.613568	0.465706	0.677864	0.539637	0.645716	0.571785	0.60875	0.555711	0.592677	0.515255
TPM2	ACTA2	VCL	22.6667	3970.12	1.90653	0.809279	0	0.594232	0.874561	0.488329	0.514805	0.366247	0.584887	0.440526	0.549846	0.475567	0.512706	0.458046	0.495186	0.489281
TPM2	MYLK	VCL	22.3333	3981.81	2.14547	0.80857	0	0.588573	0.873794	0.549528	0.559289	0.412146	0.630594	0.485717	0.594942	0.52137	0.558156	0.503544	0.54033	0.502974
TPM2	DMD	VCL	24.3333	6282.87	1.88042	0.798582	0	0.726738	0.863001	0.481641	0.542915	0.361231	0.576981	0.452073	0.559948	0.469106	0.514527	0.46059	0.506011	0.517845
TPM2	VCL	ACTN1	24.6667	5624.84	1.49165	0.775591	0	0.703991	0.838155	0.382063	0.462545	0.286547	0.496086	0.374546	0.479315	0.391317	0.435316	0.382931	0.426931	0.481052
TPM2	TPM3	VCL	23.3333	4266.85	1.26193	0.775118	1	0.619619	0.837645	0.323225	0.397323	0.325752	0.45183	0.361538	0.424576	0.388791	0.406684	0.375164	0.393057	0.528455
TPM2	ACTN2	VCL	24.3333	5532.33	2.51262	0.787707	0	0.693753	0.851249	0.643568	0.656114	0.482676	0.695488	0.569395	0.675801	0.589082	0.632441	0.579238	0.622598	0.547142
TPM2	MYL6	VCL	22.3333	4107.41	1.22869	0.72961	0	0.594093	0.788465	0.31471	0.384556	0.236033	0.433149	0.310294	0.408852	0.334591	0.371722	0.322443	0.359573	0.424317
TPM2	MYL9	ACTG2	18	1370.99	3.10786	0.833215	0	0.393586	0.900428	0.796031	0.69542	0.597023	0.82213	0.646222	0.758775	0.709577	0.734176	0.677899	0.702498	0.522511
TPM2	ACTA2	MYL9	18.3333	1293.86	2.59012	0.85721	0	0.396369	0.926359	0.663419	0.596656	0.497564	0.729154	0.54711	0.662905	0.613359	0.638132	0.580235	0.605008	0.496537
TPM2	MYLK	MYL9	18	1305.55	2.82905	0.856501	0	0.39071	0.925592	0.724617	0.641141	0.543463	0.774861	0.592302	0.708001	0.659162	0.683581	0.625732	0.650151	0.51023
TPM2	TPM3	MYL9	19	1590.6	1.94552	0.82305	1	0.421756	0.889442	0.498314	0.479175	0.457069	0.596096	0.468122	0.537636	0.526583	0.532109	0.497352	0.502879	0.535711
TPM2	MYL6	MYL9	18	1431.15	1.91228	0.777541	0	0.39623	0.840263	0.4898	0.466407	0.36735	0.577416	0.416879	0.521912	0.472383	0.497147	0.444631	0.469395	0.431573
TPM2	MYL9	TAGLN	16.3333	1527.15	2.70898	0.854787	0	0.369585	0.92374	0.693864	0.612794	0.520398	0.751333	0.566596	0.682063	0.635865	0.658964	0.601231	0.62433	0.496797
TPM2	ACTA2	ACTG2	16.6667	879.339	2.9592	0.836702	0	0.347287	0.904196	0.757953	0.655286	0.568465	0.794514	0.611875	0.7249	0.681489	0.703195	0.646682	0.668388	0.502359
TPM2	MYLK	ACTG2	16.3333	891.026	3.19813	0.835993	0	0.341628	0.90343	0.819151	0.699771	0.614364	0.840221	0.657067	0.769996	0.727292	0.748644	0.69218	0.713531	0.516052
TPM2	TPM3	ACTG2	17.3333	1176.08	2.3146	0.802541	1	0.372674	0.86728	0.592848	0.537805	0.52797	0.661456	0.532887	0.599631	0.594713	0.597172	0.5638	0.566259	0.541534
TPM2	ACTC1	ACTG2	14.3333	804.634	2.6209	0.776359	0	0.300794	0.838986	0.671302	0.578675	0.503477	0.713223	0.541076	0.645949	0.60835	0.627149	0.574713	0.593512	0.452771
TPM2	MYL6	ACTG2	16.3333	1016.63	2.28136	0.757033	0	0.347148	0.818101	0.584334	0.525037	0.43825	0.642776	0.481644	0.583907	0.540513	0.56221	0.511079	0.532775	0.437396
TPM2	TAGLN	ACTG2	14.6667	1112.63	3.07806	0.834279	0	0.320503	0.901578	0.788398	0.671424	0.591298	0.816693	0.631361	0.744058	0.703995	0.724027	0.667678	0.68771	0.50262
TPM2	ACTA2	MYLK	16.6667	813.896	2.68038	0.859988	0	0.344411	0.929361	0.686539	0.601007	0.514904	0.747244	0.557956	0.674126	0.631074	0.6526	0.594515	0.616041	0.490078
TPM2	ACTA2	TPM3	17.6667	1098.95	1.79685	0.826537	1	0.375457	0.893211	0.460236	0.439041	0.42851	0.56848	0.433776	0.50376	0.498495	0.501128	0.466135	0.468768	0.515559
TPM2	ACTA2	ACTN2	18.6667	2364.42	3.04754	0.839125	0	0.449591	0.906815	0.780579	0.697832	0.585434	0.812138	0.641633	0.754985	0.698786	0.726885	0.670209	0.698309	0.534246
TPM2	ACTA2	ACTC1	14.6667	727.504	2.10315	0.800355	0	0.303577	0.864917	0.53869	0.479912	0.404017	0.620246	0.441964	0.550079	0.512132	0.531105	0.477048	0.496022	0.426796
TPM2	ACTA2	MYL6	16.6667	939.498	1.76361	0.781028	0	0.349931	0.844031	0.451721	0.426274	0.338791	0.549799	0.382533	0.488036	0.444295	0.466166	0.413414	0.435284	0.411421
TPM2	ACTA2	TAGLN	15	1035.5	2.56032	0.858274	0	0.323286	0.927508	0.655785	0.57266	0.491839	0.723716	0.53225	0.648188	0.607777	0.627983	0.570014	0.590219	0.476645
TPM2	TPM3	MYLK	17.3333	1110.63	2.03578	0.825827	1	0.369798	0.892444	0.521435	0.483525	0.474409	0.614187	0.478967	0.548856	0.544298	0.546577	0.511633	0.513912	0.529253
TPM2	MYLK	MYL6	16.3333	951.184	2.00254	0.780319	0	0.344272	0.843265	0.51292	0.470758	0.38469	0.595506	0.427724	0.533132	0.490098	0.511615	0.458911	0.480428	0.425114
TPM2	TPM3	CFL2	13.6667	1526.92	1.76605	0.822813	1	0.320192	0.889187	0.452346	0.419307	0.422592	0.561556	0.42095	0.490431	0.492074	0.491253	0.456512	0.455691	0.498764
TPM2	TPM3	DMD	19.3333	3411.7	1.77074	0.815839	1	0.507962	0.88165	0.453548	0.467152	0.423494	0.560574	0.445323	0.513863	0.492034	0.502948	0.468679	0.479593	0.544124
TPM2	ACTN2	DMD	20.3333	4677.17	3.02142	0.828428	0	0.582096	0.895255	0.773891	0.725942	0.580418	0.804232	0.65318	0.765087	0.692325	0.728706	0.672753	0.709134	0.56281
TPM2	ACTC1	DMD	16.3333	3040.26	2.07704	0.789657	0	0.436083	0.853356	0.532002	0.508022	0.399001	0.61234	0.453512	0.560181	0.505671	0.532926	0.479591	0.506846	0.45536
TPM2	TPM3	ACTN1	19.6667	2753.66	1.38197	0.792849	1	0.485216	0.856805	0.35397	0.386781	0.348811	0.479679	0.367796	0.43323	0.414245	0.423737	0.39102	0.400513	0.507331
TPM2	ACTN2	ACTN1	20.6667	4019.14	2.63265	0.805437	0	0.559349	0.870409	0.674313	0.645572	0.505734	0.723337	0.575653	0.684454	0.614536	0.649495	0.595094	0.630054	0.526018
TPM2	TPM3	TMOD1	14	990.549	1.83533	0.811643	1	0.302792	0.877116	0.470091	0.428266	0.435901	0.571847	0.432084	0.500057	0.503874	0.501965	0.467979	0.46607	0.495833
TPM2	ACTN2	TMOD1	15	2256.02	3.08601	0.824232	0	0.376926	0.89072	0.790434	0.687057	0.592825	0.815505	0.639941	0.751281	0.704165	0.727723	0.672053	0.695611	0.51452
TPM2	TPM3	ACTN2	19.3333	2661.15	2.40294	0.804965	1	0.474977	0.869898	0.615474	0.58035	0.544939	0.67908	0.562645	0.629715	0.61201	0.620863	0.587327	0.59618	0.573421
TPM2	TPM3	ACTC1	15.3333	1024.24	1.45855	0.766194	1	0.328964	0.828	0.373585	0.36243	0.363522	0.487189	0.362976	0.42481	0.425356	0.425083	0.394166	0.393893	0.465971
TPM2	TPM3	MYL6	17.3333	1236.23	1.11901	0.746868	1	0.375318	0.807115	0.286617	0.308792	0.298296	0.416742	0.303544	0.362767	0.357519	0.360143	0.330532	0.333156	0.450596
TPM2	ACTN2	ACTC1	16.3333	2289.71	2.70923	0.778783	0	0.403098	0.841604	0.693928	0.621221	0.520446	0.730847	0.570833	0.676034	0.625647	0.65084	0.59824	0.623434	0.484658
MEIS1	PBX3	MAB21L1	4.66667	1025.33	1.49665	0.872488	0	0.131481	0.942869	0.383344	0.320378	0.287508	0.523225	0.303943	0.421801	0.405366	0.413584	0.354655	0.362872	0.364423
MEIS1	PBX3	MAB21L2	3.66667	257.333	1.78563	0.852364	0	0.0792105	0.921122	0.457363	0.362825	0.343022	0.573302	0.352923	0.468063	0.458162	0.463113	0.405543	0.410493	0.364424
PPP1R12C	PPP1R12B	MYL9	11.3333	787.89	2.23536	0.818381	0	0.244503	0.884397	0.572552	0.49054	0.429414	0.650513	0.459977	0.570526	0.539963	0.555245	0.49997	0.515252	0.425363
PPP1R12C	PPP1R12A	MYL9	12.6667	1169.7	1.51277	0.779019	0	0.285974	0.84186	0.387473	0.362098	0.290605	0.50107	0.326351	0.431584	0.395837	0.413711	0.361094	0.378968	0.378827
PPP1R12C	PPP1R14A	PPP1R12B	6.33333	201.793	1.97579	0.795272	0	0.126152	0.859424	0.506069	0.41109	0.379552	0.594408	0.395321	0.502749	0.48698	0.494864	0.44115	0.449035	0.372911
PPP1R12C	PPP1R12A	PPP1R14A	7.66667	583.604	1.25321	0.75591	0	0.167624	0.816887	0.32099	0.282649	0.240743	0.444964	0.261696	0.363806	0.342853	0.35333	0.302275	0.312751	0.326375
PPP1R12C	PRKG1	PPP1R12B	9.66667	1194.74	1.85737	0.818972	0	0.231519	0.885035	0.475737	0.414682	0.356803	0.578061	0.385742	0.496372	0.467432	0.481902	0.426587	0.441057	0.398073
PPP1R12C	PPP1R12A	PRKG1	11	1576.55	1.13479	0.77961	0	0.27299	0.842499	0.290658	0.286241	0.217993	0.428618	0.252117	0.357429	0.323306	0.340368	0.287711	0.304773	0.351537
PPP1R12C	PPP1R12A	PPP1R12B	9	715.065	1.52306	0.765898	0	0.198092	0.827681	0.390109	0.342105	0.292582	0.499502	0.317343	0.420803	0.396042	0.408423	0.356692	0.369073	0.353971
PHC1	SCMH1	CBX6	3.66667	615.333	0.992253	0.798759	0	0.094944	0.863192	0.25415	0.214349	0.190613	0.406411	0.202481	0.31038	0.298512	0.304446	0.250496	0.25643	0.303072
PHC1	EZH1	CBX6	4	615.333	0.997454	0.821749	0	0.101117	0.888037	0.255482	0.216891	0.191612	0.413621	0.204251	0.315256	0.302616	0.308936	0.253434	0.259754	0.311159
PHC1	CBX7	EZH1	3.66667	615	1.00157	0.821217	0	0.0949293	0.887462	0.256537	0.216135	0.192402	0.414268	0.204269	0.315201	0.303335	0.309268	0.253802	0.259735	0.309732
PHC1	CBX7	CBX6	4	615.333	1.28268	0.835047	0	0.101117	0.902408	0.32854	0.271684	0.246405	0.472007	0.259044	0.371845	0.359206	0.365525	0.309125	0.315445	0.333016
ILK	VCL	MYL9	22.6667	4694.97	1.57834	0.81513	0	0.626088	0.880884	0.404266	0.459722	0.3032	0.523421	0.381461	0.491571	0.41331	0.452441	0.397385	0.436516	0.47781
ILK	ITGB3	VCL	24.6667	6664.62	1.03938	0.796631	0	0.749688	0.860893	0.266221	0.387088	0.199666	0.414889	0.293377	0.400988	0.307278	0.354133	0.300327	0.347183	0.4692
ILK	TGFB1I1	VCL	17.6667	4134.83	1.26055	0.819326	0	0.508878	0.885419	0.32287	0.369372	0.242152	0.463507	0.305762	0.416439	0.352829	0.384634	0.329296	0.361101	0.429292
ILK	TNS1	VCL	19.3333	4140.59	1.52519	0.824468	0	0.539996	0.890975	0.390654	0.427989	0.29299	0.515734	0.36049	0.471862	0.404362	0.438112	0.382426	0.416176	0.455406
ILK	VCL	ACTN1	23.3333	5858.03	1.01479	0.784929	0	0.689548	0.848247	0.259922	0.367328	0.194941	0.407003	0.281135	0.387166	0.300972	0.344069	0.291053	0.33415	0.449429
ILK	HSPG2	VCL	20.3333	6172.38	0.99237	0.793144	0	0.647808	0.857125	0.25418	0.352587	0.190635	0.404916	0.271611	0.378752	0.297776	0.338264	0.284693	0.325181	0.439778
ILK	TLN1	VCL	23.3333	5175.47	1.04379	0.810638	0	0.659551	0.87603	0.267351	0.365401	0.200513	0.419521	0.282957	0.392461	0.310017	0.351239	0.296487	0.337709	0.450733
ILK	VCL	FERMT2	17.3333	4089.69	1.3392	0.834043	0	0.500722	0.901322	0.343016	0.382443	0.257262	0.482593	0.319852	0.432518	0.369927	0.401223	0.34489	0.376185	0.436265
ILK	TLN1	MYL9	19	2499.22	1.72738	0.85857	0	0.461688	0.927828	0.442441	0.447253	0.331831	0.563788	0.389542	0.50552	0.447809	0.476665	0.418676	0.447531	0.457989
ILK	PPP1R12A	MYL9	16	1945.89	1.54963	0.810579	0	0.381815	0.875966	0.396913	0.393138	0.297685	0.516676	0.345412	0.454907	0.407181	0.431044	0.376296	0.40016	0.413673
ILK	PPP1R12A	PPP1R14A	11	1359.79	1.29007	0.78747	0	0.263464	0.850993	0.33043	0.313689	0.247823	0.460571	0.280756	0.38713	0.354197	0.370663	0.317476	0.333943	0.361222
ILK	ITGB3	CAV1	22	8998.4	1.11154	0.830556	0	0.80287	0.897554	0.284704	0.414246	0.213528	0.437917	0.313887	0.426081	0.325722	0.375902	0.319805	0.369984	0.496282
ILK	TNS1	ITGB3	17	3433.99	1.66982	0.853901	0	0.465732	0.922782	0.427699	0.437207	0.320774	0.551469	0.37899	0.494338	0.436122	0.46523	0.407556	0.436664	0.454053
ILK	ITGB3	ACTN1	21	5151.43	1.15942	0.814362	0	0.615285	0.880054	0.296966	0.376546	0.222725	0.442738	0.299635	0.409642	0.332731	0.371187	0.316183	0.354639	0.448076
ILK	TLN1	ITGB3	21	4468.87	1.18842	0.840071	0	0.585287	0.907837	0.304396	0.374619	0.228297	0.455256	0.301458	0.414937	0.341777	0.378357	0.321617	0.358198	0.44938
ILK	ITGB3	FERMT2	15	3383.09	1.48383	0.863475	0	0.426458	0.933129	0.380061	0.39166	0.285046	0.518328	0.338353	0.454994	0.401687	0.42834	0.37002	0.396673	0.434912
ILK	TGFB1I1	TNS1	10	904.197	1.89099	0.876596	0	0.224923	0.947308	0.484347	0.419491	0.36326	0.600087	0.391376	0.509789	0.481674	0.495731	0.436525	0.450582	0.414144
ILK	TNS1	ACTN1	15.6667	2627.4	1.64523	0.842199	0	0.405593	0.910136	0.421399	0.417447	0.316049	0.543583	0.366748	0.480515	0.429816	0.455166	0.398282	0.423632	0.434282
ILK	TLN1	TNS1	15.6667	1944.84	1.67423	0.867908	0	0.375596	0.937919	0.428829	0.41552	0.321621	0.556101	0.368571	0.485811	0.438861	0.462336	0.403716	0.427191	0.435586
ILK	TLN1	ACTN1	19.6667	3662.28	1.16383	0.828369	0	0.525148	0.895191	0.298096	0.354859	0.223572	0.44737	0.289216	0.401115	0.335471	0.368293	0.312343	0.345165	0.429609
SSPN	DMD	SGCA	10.3333	2427.9	2.17351	0.861525	0	0.29806	0.931021	0.556711	0.492048	0.417534	0.650289	0.454791	0.571169	0.533911	0.55254	0.494351	0.51298	0.446448
SSPN	DMD	DTNA	10.6667	2435.18	2.02132	0.868676	0	0.304552	0.938749	0.51773	0.464436	0.388297	0.622985	0.426366	0.54371	0.505641	0.524676	0.466004	0.485038	0.440258
SSPN	DMD	SGCD	10.6667	2480.8	1.99848	0.872222	0	0.306557	0.942582	0.511881	0.46055	0.38391	0.619556	0.42223	0.540053	0.501733	0.520893	0.461982	0.481141	0.440255
SSPN	DMD	PGM5	10.3333	2706.05	2.41955	0.873877	0	0.310284	0.94437	0.619729	0.542368	0.464797	0.700889	0.503582	0.621628	0.582843	0.602236	0.543213	0.562605	0.468596
SSPN	DTNA	SGCA	5.33333	9.56539	2.14446	0.868617	0	0.0991858	0.938686	0.54927	0.436749	0.411952	0.646624	0.424351	0.541686	0.529288	0.535487	0.476819	0.483019	0.396785
SSPN	SGCA	SGCD	5.33333	55.1834	2.12162	0.872163	0	0.101191	0.942518	0.543421	0.432863	0.407565	0.643195	0.420214	0.538029	0.52538	0.531705	0.472797	0.479122	0.396782
SSPN	PGM5	SGCA	5	280.44	2.54268	0.873818	0	0.104917	0.944306	0.651269	0.514681	0.488452	0.724528	0.501566	0.619605	0.60649	0.613047	0.554028	0.560585	0.425123
SSPN	DTNA	SGCD	5.66667	62.463	1.96943	0.879314	0	0.107683	0.950246	0.504439	0.40525	0.378329	0.615891	0.39179	0.510571	0.49711	0.50384	0.44445	0.45118	0.390592
SSPN	PGM5	SGCD	5.33333	333.337	2.36766	0.884515	0	0.113415	0.955866	0.606438	0.483182	0.454829	0.693795	0.469005	0.588489	0.574312	0.5814	0.521659	0.528747	0.41893
JPH2	RYR2	CACNA1C	13.6667	4331.79	2.25094	0.81383	0	0.44346	0.879479	0.576544	0.543273	0.432408	0.652278	0.48784	0.597775	0.542343	0.570059	0.515092	0.542808	0.474871
JPH2	RYR2	CASQ2	8	851.403	2.76644	0.810638	0	0.185566	0.87603	0.70858	0.577827	0.531435	0.750443	0.554631	0.664135	0.640939	0.652537	0.597785	0.609383	0.442544
GFRA1	NCAM1	GDNF	8	724.675	1.37253	0.794917	0	0.179996	0.859041	0.351551	0.308663	0.263664	0.478424	0.286163	0.393543	0.371044	0.382293	0.328603	0.339853	0.347647
GFRA1	GAB1	RAP1A	7.33333	1018.19	1.21383	0.755851	0	0.18055	0.816823	0.310903	0.278314	0.233177	0.437383	0.255746	0.357849	0.33528	0.346564	0.295513	0.306797	0.327069
GFRA1	RAP1A	GDNF	8.66667	1221.44	1.07459	0.739598	0	0.214174	0.799259	0.275238	0.259972	0.206429	0.406244	0.233201	0.333108	0.306336	0.319722	0.269768	0.283154	0.322168
GFRA1	DOK6	GDNF	6.66667	416.16	1.4332	0.820981	0	0.141746	0.887207	0.367092	0.310756	0.275319	0.497121	0.293037	0.403938	0.38622	0.395079	0.339629	0.348488	0.349011
GFRA1	PDLIM7	GDNF	7.66667	546.372	1.33733	0.792908	0	0.165987	0.856869	0.342537	0.2984	0.256903	0.47112	0.277651	0.38476	0.364012	0.374386	0.320832	0.331206	0.341348
GFRA1	GAB1	GDNF	8	502.915	1.13324	0.772991	0	0.17025	0.835345	0.290261	0.260258	0.217696	0.426532	0.238977	0.343395	0.322114	0.332755	0.280546	0.291186	0.323964
GFRA1	CHL1	GDNF	7.66667	662.9	1.45604	0.793913	0	0.171109	0.857955	0.372942	0.322484	0.279707	0.494195	0.301095	0.40834	0.386951	0.397645	0.344023	0.354717	0.350501
ATP1B2	ATP1A2	FXYD1	4.33333	308.941	2.84661	0.881147	0	0.0938243	0.952226	0.729116	0.570293	0.546837	0.784893	0.558565	0.677593	0.665865	0.671729	0.612215	0.618079	0.443791
ATP1B2	FXYD6	ATP1A2	3.66667	190.435	2.73381	0.89539	0	0.0762705	0.967618	0.700222	0.544234	0.525166	0.767071	0.5347	0.655653	0.646119	0.650886	0.59041	0.595176	0.436028
ATP1B2	ATP1A2	PLN	5.66667	485.503	3.02728	0.885757	0	0.126275	0.957208	0.77539	0.613111	0.581542	0.820844	0.597327	0.716978	0.701193	0.709086	0.64926	0.657152	0.464718
ATP1B2	PLN	FXYD1	5.33333	441.625	2.58807	0.883629	0	0.118174	0.954908	0.662893	0.526713	0.49717	0.735897	0.511941	0.631305	0.616533	0.623919	0.564237	0.571623	0.433994
RYR2	RYR3	CASQ1	7.33333	795.8	2.36432	0.773463	0	0.170776	0.835856	0.605585	0.496883	0.454188	0.663152	0.475535	0.580017	0.55867	0.569344	0.517103	0.527776	0.403054
RYR2	CASQ2	CASQ1	8	844.128	2.78237	0.802719	0	0.185246	0.867471	0.712661	0.580807	0.534495	0.751363	0.557651	0.666085	0.642929	0.654507	0.60029	0.611868	0.441344
RYR2	RYR3	NOS1	10.3333	1829.2	2.1083	0.773227	0	0.271748	0.835601	0.540009	0.472944	0.405007	0.613907	0.438976	0.543426	0.509457	0.526441	0.474216	0.491201	0.41184
RYR2	CACNA1C	NOS1	16.6667	5357.91	2.01085	0.805674	0	0.544112	0.870665	0.515049	0.522315	0.386287	0.603953	0.454301	0.563134	0.49512	0.529127	0.47471	0.508717	0.482456
RYR2	CAMK2A	NOS1	15.6667	6358.17	1.97913	0.790071	1	0.569553	0.853803	0.506923	0.52258	0.463525	0.593643	0.493053	0.558112	0.528584	0.543348	0.510819	0.525582	0.565903
RYR2	RYR3	CACNA1C	14.3333	4353.24	2.01375	0.793203	0	0.456749	0.857188	0.515791	0.501031	0.386843	0.601141	0.443937	0.551086	0.493992	0.522539	0.468964	0.497511	0.457432
RYR2	RYR3	CASQ2	8.66667	872.858	2.52925	0.790012	0	0.198854	0.85374	0.647828	0.535584	0.485871	0.699306	0.510728	0.617445	0.592588	0.605017	0.551658	0.564086	0.425105
RYR2	KCNH2	CACNA1C	17	5047.2	1.69819	0.803073	0	0.53663	0.867855	0.434965	0.460381	0.326224	0.543187	0.393302	0.501784	0.434706	0.468245	0.414004	0.447543	0.459862
RYR2	KCNH2	ANK2	11.6667	2485.6	1.87878	0.817376	0	0.325287	0.883311	0.481219	0.442236	0.360915	0.581742	0.401575	0.511989	0.471328	0.491659	0.436452	0.456782	0.422454
RYR2	ANK2	CACNA1C	15.3333	5320.35	2.09689	0.839953	0	0.51777	0.907709	0.537085	0.532256	0.402814	0.629741	0.467535	0.580999	0.516278	0.548638	0.491906	0.524267	0.490641
RYR2	CAMK2A	CACNA1C	19.6667	8882.21	1.88458	0.810047	1	0.754554	0.875391	0.482705	0.550667	0.445362	0.580876	0.498014	0.565772	0.513119	0.539445	0.505567	0.531893	0.611496
PDE7B	ADCY5	ADCY2	13.6667	2517.36	2.46249	0.8763	2	0.36372	0.946989	0.630727	0.563975	0.639712	0.709793	0.601844	0.636884	0.674752	0.655818	0.638298	0.619364	0.652026
PDE7B	ADCY5	ADCY9	13.3333	2162.61	2.04439	0.857624	2	0.341956	0.926806	0.523639	0.478218	0.559396	0.624431	0.518807	0.551325	0.591913	0.571619	0.55536	0.535066	0.614767
PDE7B	ADCY2	ADCY9	11.3333	616.209	1.78883	0.85331	2	0.236958	0.922143	0.458181	0.402875	0.510302	0.574172	0.456589	0.488523	0.542237	0.51538	0.499413	0.472556	0.570987
PRPH	NEFM	NEFL	4.66667	672.867	2.12788	0.820449	0	0.115991	0.886632	0.545023	0.437765	0.408767	0.630425	0.423266	0.534095	0.519596	0.526846	0.471431	0.478681	0.386912
AR	GNAO1	GNAZ	10.3333	1717.68	2.0658	0.848759	1	0.266847	0.917226	0.529122	0.463553	0.480175	0.626148	0.471864	0.54485	0.553161	0.549006	0.512512	0.508357	0.511632
AR	ZBTB16	HDAC4	8	1884.35	1.84901	0.839421	2	0.230962	0.907134	0.473596	0.412938	0.521864	0.581981	0.467401	0.497459	0.551922	0.524691	0.509662	0.48243	0.56959
AR	FLNA	CAV1	18.3333	9491.34	1.85979	0.869208	1	0.756632	0.939324	0.476357	0.546426	0.440601	0.592099	0.493513	0.569262	0.51635	0.542806	0.504931	0.531388	0.626412
AR	GSN	FLNA	11.6667	3940.43	1.89489	0.86383	1	0.389224	0.933512	0.485346	0.461315	0.447343	0.597387	0.454329	0.529351	0.522365	0.525858	0.488347	0.49184	0.535354
AR	FLNA	SVIL	10.6667	3876.03	2.2275	0.874173	1	0.367875	0.944689	0.57054	0.519874	0.511238	0.664077	0.515556	0.591976	0.587658	0.589817	0.551607	0.553766	0.554109
HSPG2	DMD	VCL	22.3333	7790.6	1.38785	0.795922	0	0.755962	0.860126	0.355475	0.455597	0.266606	0.481638	0.361102	0.468618	0.374122	0.42137	0.367612	0.41486	0.492891
HSPG2	FGF2	CSPG4	11.3333	3989.46	1.55425	0.816312	1	0.385206	0.882161	0.398098	0.394875	0.381907	0.519114	0.388391	0.456994	0.45051	0.453752	0.41945	0.422692	0.4997
HSPG2	SDC3	CSPG4	9	2835.77	1.28331	0.811702	0	0.291293	0.87718	0.3287	0.319349	0.246525	0.46582	0.282937	0.392584	0.356173	0.374379	0.319555	0.337761	0.374293
HSPG2	SDC3	FGF2	11.3333	3616.96	1.36801	0.841844	1	0.368835	0.909753	0.350394	0.355004	0.346129	0.490233	0.350566	0.422619	0.418181	0.4204	0.384374	0.386593	0.490579
HSPG2	FGF2	DCN	11.3333	3782.21	1.65748	0.861288	1	0.376098	0.930766	0.424537	0.412427	0.401736	0.551094	0.407081	0.48176	0.476415	0.479088	0.441748	0.444421	0.516183
HSPG2	DMD	LAMB2	14.3333	4751.69	1.36221	0.807861	1	0.47426	0.873028	0.34891	0.380248	0.345016	0.47994	0.362632	0.430094	0.412478	0.421286	0.387555	0.396363	0.507383
HSPG2	SDC3	HS6ST2	7.33333	2272.98	1.01132	0.782004	0	0.235696	0.845085	0.259033	0.253198	0.194275	0.405546	0.223737	0.329372	0.29991	0.314641	0.261823	0.276554	0.334953
HSPG2	SDC3	DCN	9	2628.52	1.38654	0.856678	0	0.282185	0.925784	0.355139	0.336901	0.266355	0.497801	0.301628	0.417351	0.382078	0.399714	0.341853	0.359489	0.390777
NGFR	FGF2	HGF	12.3333	4434.18	2.20699	0.875532	2	0.423269	0.946158	0.565286	0.529782	0.590631	0.660504	0.560206	0.595143	0.625568	0.610355	0.592887	0.577675	0.650345
PDE4D	ADCY5	AKAP6	11.3333	2512.43	2.10941	0.804433	1	0.320293	0.869324	0.540293	0.485293	0.488553	0.622551	0.486923	0.553922	0.555552	0.554737	0.521238	0.520423	0.515811
PDE4D	ADCY5	CACNA1C	17.6667	5792.15	1.92961	0.818499	1	0.581714	0.884524	0.494239	0.516108	0.454013	0.591811	0.485061	0.553959	0.522912	0.538436	0.503986	0.51951	0.573453
PDE4D	ADCY5	ADCY2	15	2720.19	1.90396	0.814598	2	0.397325	0.880309	0.48767	0.465084	0.532419	0.58583	0.498751	0.525457	0.559125	0.542291	0.528938	0.512104	0.607993
PDE4D	ADCY5	ADCY9	14.6667	2365.43	1.48587	0.795922	2	0.375561	0.860126	0.380582	0.379327	0.452103	0.500468	0.415715	0.439897	0.476286	0.458091	0.446	0.427806	0.570734
PDE4D	ADCY2	ADCY9	12.6667	819.036	1.23031	0.791608	2	0.270563	0.855464	0.315124	0.303984	0.40301	0.450209	0.353497	0.377096	0.426609	0.401853	0.390053	0.365296	0.526954
DNAJB4	DNAJB5	HSPA2	4.66667	576.628	1.64467	0.82305	0	0.111761	0.889442	0.421256	0.343883	0.315942	0.538303	0.329912	0.441093	0.427122	0.434108	0.378517	0.385503	0.355615
IGSF9B	NLGN2	MAGI2	4	889.885	1.46791	0.832092	0	0.113183	0.899214	0.375982	0.310282	0.281986	0.50679	0.296134	0.408536	0.394388	0.401462	0.345261	0.352335	0.347095
CMYA5	DMD	SYNM	11.3333	2849.22	2.75868	0.86117	0	0.335095	0.930638	0.706594	0.613719	0.529946	0.762605	0.571832	0.688162	0.646275	0.667219	0.609054	0.629997	0.493082
CMYA5	ACTN2	DMD	16.3333	4221.46	2.8695	0.857447	0	0.487994	0.926614	0.734977	0.673231	0.551233	0.782886	0.612232	0.728059	0.667059	0.697559	0.639646	0.670145	0.537396
CMYA5	ACTN2	MYOZ2	12.3333	1891.04	2.82202	0.839096	0	0.311503	0.906783	0.722816	0.619988	0.542112	0.768808	0.58105	0.694398	0.65546	0.674929	0.618255	0.637724	0.485275
CMYA5	ACTN2	LDB3	14	3006.51	3.3415	0.856915	0	0.39139	0.926039	0.855874	0.739753	0.641906	0.873416	0.69083	0.806584	0.757661	0.782123	0.724245	0.748707	0.543326
CMYA5	SMPX	MYOZ2	7	373.47	2.22073	0.821483	0	0.146043	0.88775	0.568806	0.463115	0.426605	0.648542	0.44486	0.555829	0.537573	0.546701	0.491217	0.500344	0.40065
CMYA5	LDB3	SMPX	8.66667	1488.94	2.74022	0.839303	0	0.22593	0.907006	0.701865	0.582881	0.526398	0.75315	0.55464	0.668016	0.639774	0.653895	0.597207	0.611328	0.4587
CMYA5	CASQ2	MYOZ2	7.66667	292.269	2.66626	0.852157	0	0.15482	0.920898	0.682921	0.550896	0.512191	0.742415	0.531543	0.646655	0.627303	0.636979	0.579423	0.589099	0.43966
CMYA5	LDB3	CASQ2	9.33333	1407.74	3.18575	0.869976	0	0.234707	0.940155	0.815979	0.670661	0.611985	0.847023	0.641323	0.758842	0.729504	0.744173	0.685413	0.700083	0.49771
CMYA5	LDB3	MYOZ2	10	1426.64	2.66183	0.849439	0	0.247883	0.91796	0.681787	0.573311	0.51134	0.74083	0.542326	0.657071	0.626085	0.641578	0.584206	0.599698	0.461908
ACTA2	TPM1	MYH11	19.6667	1459.88	2.66131	0.831738	0	0.428356	0.898831	0.681652	0.618328	0.511239	0.735947	0.564784	0.677138	0.623593	0.650365	0.594188	0.620961	0.50221
ACTA2	TPM1	CALD1	17.3333	837.918	2.09426	0.846277	0	0.357813	0.914543	0.536411	0.491761	0.402308	0.630944	0.447035	0.561353	0.516626	0.538989	0.48183	0.504194	0.452192
ACTA2	TPM1	VCL	23.6667	4051.41	1.6194	0.790662	0	0.616323	0.854442	0.414783	0.465168	0.311087	0.524698	0.388128	0.494933	0.417893	0.456413	0.40301	0.44153	0.471387
ACTA2	TPM1	MYL9	19.3333	1375.15	2.30298	0.838593	0	0.41846	0.90624	0.589873	0.54702	0.442405	0.668965	0.494712	0.607992	0.555685	0.581838	0.525198	0.551352	0.478643
ACTA2	TPM1	ACTG2	17.6667	960.627	2.67206	0.818085	0	0.369378	0.884077	0.684407	0.60565	0.513305	0.734324	0.559477	0.669987	0.623815	0.646901	0.591646	0.614732	0.484466
ACTA2	TPM1	CNN1	15.3333	960.107	2.6476	0.827955	0	0.326146	0.894744	0.678142	0.590143	0.508606	0.732292	0.549375	0.661218	0.620449	0.640833	0.584912	0.605296	0.474758
ACTA2	TPM1	MYLK	17.6667	895.184	2.39325	0.841371	0	0.366502	0.909242	0.612993	0.55137	0.459745	0.687055	0.505558	0.619213	0.5734	0.596306	0.539479	0.562385	0.472184
ACTA2	TLN1	TPM1	20	1855.66	1.76844	0.834102	0	0.451923	0.901386	0.452958	0.452699	0.339718	0.565065	0.396209	0.508882	0.452392	0.480637	0.4243	0.452545	0.451567
ACTA2	TPM3	TPM1	18.6667	1180.23	1.50972	0.80792	1	0.397548	0.873092	0.38669	0.389405	0.373351	0.508291	0.381378	0.448848	0.440821	0.444834	0.411099	0.415113	0.497666
ACTA2	ACTN2	TPM1	19.6667	2445.7	2.7604	0.820508	0	0.471682	0.886696	0.707033	0.648195	0.530275	0.751949	0.589235	0.700072	0.641112	0.670592	0.615173	0.644653	0.516353
ACTA2	ACTC1	TPM1	15.6667	808.792	1.81601	0.781738	0	0.325668	0.844798	0.465144	0.430275	0.348858	0.560057	0.389566	0.495166	0.454458	0.474812	0.422012	0.442366	0.408902
ACTA2	TPM1	MYL6	17.6667	1020.79	1.47647	0.762411	0	0.372022	0.823913	0.378176	0.376637	0.283632	0.48961	0.330134	0.433124	0.386621	0.409872	0.358378	0.381629	0.393528
ACTA2	MYH11	CALD1	17	871.672	2.83311	0.877364	0	0.353123	0.948138	0.725657	0.632523	0.544243	0.781277	0.588383	0.7069	0.66276	0.68483	0.625571	0.647642	0.50673
ACTA2	MYH11	VCL	23.3333	4085.16	2.35825	0.821749	0	0.611634	0.888037	0.604029	0.60593	0.453022	0.675031	0.529476	0.64048	0.564026	0.602253	0.546751	0.584978	0.525925
ACTA2	MYH11	MYL9	19	1408.91	3.04183	0.869681	0	0.413771	0.939835	0.779119	0.687782	0.584339	0.819298	0.63606	0.75354	0.701818	0.727679	0.668939	0.6948	0.533181
ACTA2	MYH11	ACTG2	17.3333	994.381	3.41091	0.849173	0	0.364689	0.917673	0.873653	0.746412	0.655239	0.884658	0.700825	0.815535	0.769948	0.792742	0.735387	0.75818	0.539003
ACTA2	CNN1	MYH11	15	993.862	3.38645	0.859043	0	0.321456	0.928339	0.867388	0.730905	0.650541	0.882625	0.690723	0.806765	0.766583	0.786674	0.728653	0.748744	0.529296
ACTA2	MYLK	MYH11	17.3333	928.938	3.1321	0.872459	0	0.361813	0.942837	0.802239	0.692132	0.601679	0.837388	0.646906	0.76476	0.719534	0.742147	0.68322	0.705833	0.526722
ACTA2	TLN1	MYH11	19.6667	1889.41	2.50729	0.865189	0	0.447234	0.934981	0.642204	0.593461	0.481653	0.715398	0.537557	0.654429	0.598525	0.626477	0.568041	0.595993	0.506105
ACTA2	TPM3	MYH11	18.3333	1213.99	2.24857	0.839007	1	0.392859	0.906687	0.575936	0.530166	0.515285	0.658624	0.522726	0.594395	0.586954	0.590675	0.55484	0.55856	0.552204
ACTA2	ACTC1	MYH11	15.3333	842.547	2.55487	0.812825	0	0.320979	0.878393	0.654389	0.571037	0.490792	0.71039	0.530914	0.640714	0.600591	0.620652	0.565753	0.585814	0.46344
ACTA2	MYL6	MYH11	17.3333	1054.54	2.21533	0.793499	0	0.367333	0.857508	0.567421	0.517399	0.425566	0.639943	0.471483	0.578671	0.532754	0.555713	0.502118	0.525077	0.448065
ACTA2	MYH11	TAGLN	15.6667	1150.54	3.01203	0.870745	0	0.340688	0.940985	0.771485	0.663786	0.578614	0.81386	0.6212	0.738823	0.696237	0.71753	0.658718	0.680011	0.513289
ACTA2	VCL	CALD1	21	3463.2	1.7912	0.836288	0	0.54109	0.903749	0.458787	0.479363	0.344091	0.570028	0.411727	0.524695	0.457059	0.490877	0.434393	0.468211	0.475907
ACTA2	MYL9	CALD1	16.6667	786.945	2.47478	0.88422	0	0.343227	0.955547	0.633877	0.561215	0.475408	0.714295	0.518311	0.637755	0.594851	0.616303	0.556581	0.578033	0.483163
ACTA2	ACTG2	CALD1	15	372.42	2.84386	0.863712	0	0.294145	0.933384	0.728411	0.619845	0.546308	0.779655	0.583077	0.69975	0.662981	0.681366	0.623029	0.641413	0.488985
ACTA2	MYLK	CALD1	15	306.977	2.56505	0.886998	0	0.291269	0.958549	0.656997	0.565565	0.492748	0.732385	0.529157	0.648975	0.612567	0.630771	0.570862	0.589066	0.476704
ACTA2	TLN1	CALD1	17.3333	1267.45	1.94024	0.879728	0	0.37669	0.950693	0.496962	0.466894	0.372722	0.610395	0.419808	0.538645	0.491558	0.515101	0.455683	0.479226	0.456086
ACTA2	TPM3	CALD1	16	592.026	1.68152	0.853546	1	0.322315	0.922399	0.430694	0.4036	0.406354	0.553621	0.404977	0.47861	0.479987	0.479299	0.442482	0.441793	0.502185
ACTA2	MYL6	CALD1	15	432.578	1.64827	0.808038	0	0.296789	0.87322	0.42218	0.390832	0.316635	0.53494	0.353734	0.462886	0.425787	0.444337	0.389761	0.40831	0.398047
ACTA2	TAGLN	CALD1	13.3333	528.579	2.44498	0.885284	0	0.270144	0.956697	0.626244	0.537219	0.469683	0.708857	0.503451	0.623038	0.58927	0.606154	0.54636	0.563244	0.463271
ACTA2	VCL	MYL9	23	4000.43	1.99992	0.828605	0	0.601737	0.895446	0.512249	0.534621	0.384187	0.608049	0.459404	0.571335	0.496118	0.533726	0.477761	0.51537	0.502358
ACTA2	VCL	ACTG2	21.3333	3585.91	2.369	0.808097	0	0.552656	0.873284	0.606783	0.593251	0.455087	0.673408	0.524169	0.63333	0.564248	0.598789	0.544209	0.57875	0.508181
ACTA2	MYLK	VCL	21.3333	3520.47	2.09019	0.831383	0	0.54978	0.898448	0.53537	0.538972	0.401527	0.626139	0.47025	0.582556	0.513833	0.548194	0.492041	0.526403	0.495899
ACTA2	TLN1	VCL	23.6667	4480.94	1.46538	0.824113	0	0.6352	0.890592	0.375334	0.440301	0.281501	0.504149	0.360901	0.472225	0.392825	0.432525	0.376863	0.416563	0.475282
ACTA2	TPM3	VCL	22.3333	3805.51	1.20666	0.797931	1	0.580825	0.862298	0.309067	0.377006	0.315133	0.447374	0.34607	0.41219	0.381254	0.396722	0.363662	0.37913	0.521381
ACTA2	ACTN2	VCL	23.3333	5070.99	2.45734	0.81052	0	0.654959	0.875902	0.629409	0.635797	0.472057	0.691033	0.553927	0.663415	0.581545	0.62248	0.567736	0.608671	0.540068
ACTA2	MYL6	VCL	21.3333	3646.07	1.17342	0.752423	0	0.555299	0.813119	0.300552	0.364239	0.225414	0.428694	0.294826	0.396466	0.327054	0.36176	0.31094	0.345646	0.417243
ACTA2	MYL9	ACTG2	17	909.654	3.05259	0.856028	0	0.354792	0.925081	0.781873	0.675103	0.586405	0.817675	0.630754	0.746389	0.70204	0.724215	0.666397	0.688571	0.515437
ACTA2	MYLK	MYL9	17	844.211	2.77377	0.879314	0	0.351916	0.950246	0.710459	0.620824	0.532844	0.770406	0.576834	0.695615	0.651625	0.67362	0.61423	0.636224	0.503155
ACTA2	TLN1	MYL9	19.3333	1804.68	2.14897	0.872045	0	0.437337	0.94239	0.550424	0.522152	0.412818	0.648416	0.467485	0.585284	0.530617	0.55795	0.499051	0.526385	0.482538
ACTA2	TPM3	MYL9	18	1129.26	1.89024	0.845863	1	0.382962	0.914096	0.484156	0.458858	0.446451	0.591641	0.452654	0.525249	0.519046	0.522148	0.48585	0.488952	0.528637
ACTA2	MYL6	MYL9	17	969.813	1.857	0.800355	0	0.357436	0.864917	0.475642	0.44609	0.356731	0.572961	0.401411	0.509525	0.464846	0.487186	0.433128	0.455468	0.424499
ACTA2	MYL9	TAGLN	15.3333	1065.81	2.65371	0.8776	0	0.330791	0.948394	0.679706	0.592477	0.509779	0.746878	0.551128	0.669677	0.628328	0.649003	0.589728	0.610403	0.489723
ACTA2	CNN1	ACTG2	13	494.609	3.39721	0.84539	0	0.262478	0.913585	0.870142	0.718226	0.652607	0.881003	0.685416	0.799614	0.766805	0.78321	0.72611	0.742515	0.511551
ACTA2	MYLK	ACTG2	15.3333	429.686	3.14285	0.858806	0	0.302834	0.928083	0.804993	0.679454	0.603745	0.835766	0.641599	0.75761	0.719755	0.738683	0.680677	0.699604	0.508978
ACTA2	TPM3	ACTG2	16.3333	714.735	2.25932	0.825355	1	0.33388	0.891933	0.57869	0.517488	0.517351	0.657001	0.517419	0.587244	0.587176	0.58721	0.552298	0.552332	0.534459
ACTA2	ACTC1	ACTG2	13.3333	343.294	2.56562	0.799173	0	0.262001	0.863639	0.657144	0.558358	0.492858	0.708768	0.525608	0.633563	0.600813	0.617188	0.56321	0.579586	0.445696
ACTA2	MYL6	ACTG2	15.3333	555.287	2.22608	0.779846	0	0.308354	0.842754	0.570176	0.50472	0.427632	0.63832	0.466176	0.57152	0.532976	0.552248	0.499576	0.518848	0.430321
ACTA2	TAGLN	ACTG2	13.6667	651.288	3.02279	0.857092	0	0.281709	0.926231	0.77424	0.651107	0.58068	0.812237	0.615893	0.731672	0.696459	0.714065	0.656176	0.673783	0.495545
ACTA2	TLN1	MYLK	17.6667	1324.72	2.23923	0.874823	0	0.385379	0.945392	0.573544	0.526503	0.430158	0.666506	0.478331	0.596505	0.548332	0.572418	0.513331	0.537418	0.476079
ACTA2	TPM3	MYLK	16.3333	649.292	1.98051	0.848641	1	0.331004	0.917098	0.507276	0.463208	0.463791	0.609732	0.4635	0.53647	0.536761	0.536616	0.50013	0.499985	0.522178
ACTA2	MYLK	MYL6	15.3333	489.844	1.94727	0.803132	0	0.305478	0.867919	0.498762	0.450441	0.374072	0.591051	0.412256	0.520746	0.482561	0.501654	0.447409	0.466501	0.41804
ACTA2	ACTN2	TLN1	19.6667	2875.24	2.60638	0.85396	0	0.490559	0.922846	0.667584	0.623328	0.500688	0.7314	0.562008	0.677364	0.616044	0.646704	0.589026	0.619686	0.520247
ACTA2	TLN1	MYL6	17.6667	1450.32	1.32246	0.795863	0	0.390899	0.860063	0.338727	0.35177	0.254045	0.469061	0.302908	0.410415	0.361553	0.385984	0.33223	0.356661	0.397422
ACTA2	TPM3	ACTN2	18.3333	2199.81	2.34766	0.827778	1	0.436184	0.894552	0.601316	0.560033	0.534321	0.674625	0.547177	0.617329	0.604473	0.610901	0.575825	0.582253	0.566346
ACTA2	TPM3	ACTC1	14.3333	562.9	1.40328	0.789007	1	0.290171	0.852654	0.359427	0.342113	0.352904	0.482734	0.347508	0.412423	0.417819	0.415121	0.382664	0.379966	0.458896
ACTA2	TPM3	MYL6	16.3333	774.894	1.06373	0.769681	1	0.336524	0.831769	0.272459	0.288475	0.287678	0.412286	0.288076	0.350381	0.349982	0.350181	0.319029	0.319229	0.443521
ACTA2	ACTN2	ACTC1	15.3333	1828.37	2.65396	0.801596	0	0.364304	0.866258	0.67977	0.600904	0.509828	0.726392	0.555366	0.663648	0.61811	0.640879	0.586738	0.609507	0.477583
DCLK1	NBEA	MAB21L1	3.66667	1127.33	1.84098	0.87107	0	0.117445	0.941336	0.471538	0.383015	0.353653	0.588987	0.368334	0.486001	0.47132	0.478661	0.419827	0.427167	0.38258
TPM3	TPM1	MYH11	20.3333	1756.62	2.01671	0.797577	1	0.453743	0.861915	0.516548	0.500847	0.470744	0.60289	0.485796	0.551868	0.536817	0.544343	0.511306	0.518832	0.541385
TPM3	TPM1	CALD1	18	1134.65	1.44966	0.812116	1	0.383199	0.877627	0.371307	0.37428	0.361813	0.497887	0.368047	0.436083	0.42985	0.432967	0.398948	0.402065	0.491366
TPM3	TPM1	VCL	24.3333	4348.14	0.974796	0.756501	1	0.64171	0.817526	0.249679	0.347687	0.270592	0.391641	0.309139	0.369664	0.331116	0.35039	0.320128	0.339402	0.510562
TPM3	TPM1	MYL9	20	1671.89	1.65838	0.804433	1	0.443847	0.869324	0.424769	0.429538	0.40191	0.535907	0.415724	0.482723	0.468909	0.475816	0.442316	0.449223	0.517818
TPM3	TPM1	ACTG2	18.3333	1257.36	2.02746	0.783924	1	0.394765	0.847161	0.519303	0.488168	0.47281	0.601267	0.480489	0.544718	0.537039	0.540878	0.508764	0.512603	0.52364
TPM3	TPM1	MYLK	18.3333	1191.92	1.74865	0.80721	1	0.391889	0.872325	0.447889	0.433889	0.41925	0.553998	0.426569	0.493943	0.486624	0.490284	0.456597	0.460256	0.511359
TPM3	TPM1	DMD	20.3333	3492.99	1.4836	0.797222	1	0.530053	0.861532	0.380002	0.417515	0.368335	0.500385	0.392925	0.45895	0.43436	0.446655	0.413642	0.425937	0.52623
TPM3	TPM1	ACTN1	20.6667	2834.95	1.09483	0.774232	1	0.507307	0.836686	0.280424	0.337145	0.293651	0.41949	0.315398	0.378317	0.35657	0.367444	0.335984	0.346857	0.489438
TPM3	TPM1	TMOD1	15	1071.84	1.54819	0.793026	1	0.324883	0.856997	0.396545	0.378629	0.380742	0.511658	0.379686	0.445144	0.4462	0.445672	0.412943	0.412415	0.47794
TPM3	ACTN2	TPM1	20.3333	2742.44	2.1158	0.786348	1	0.497068	0.84978	0.541929	0.530714	0.48978	0.618891	0.510247	0.574802	0.554336	0.564569	0.532291	0.542525	0.555527
TPM3	ACTC1	TPM1	16.3333	1105.53	1.17141	0.747577	1	0.351055	0.807881	0.300039	0.312793	0.308363	0.427	0.310578	0.369897	0.367681	0.368789	0.33913	0.340237	0.448077
TPM3	TPM1	MYL6	18.3333	1317.52	0.831873	0.728251	1	0.397409	0.786996	0.213071	0.259156	0.243137	0.356553	0.251146	0.307854	0.299845	0.303849	0.275495	0.2795	0.432702
TPM3	TPM1	CKB	14.3333	1066.61	1.11366	0.741371	1	0.312308	0.801175	0.285247	0.292012	0.297269	0.414229	0.294641	0.353121	0.355749	0.354435	0.325195	0.323881	0.433016
TPM3	MYH11	CALD1	17.6667	1168.41	2.18851	0.843203	1	0.37851	0.911222	0.560552	0.515042	0.503748	0.64822	0.509395	0.581631	0.575984	0.578807	0.542689	0.545513	0.545904
TPM3	MYH11	VCL	24	4381.9	1.71365	0.787589	1	0.63702	0.851121	0.438924	0.488448	0.412527	0.541974	0.450488	0.515211	0.47725	0.496231	0.463869	0.482849	0.5651
TPM3	MYH11	MYL9	19.6667	1705.64	2.39723	0.83552	1	0.439157	0.902919	0.614014	0.5703	0.543844	0.68624	0.557072	0.62827	0.615042	0.621656	0.586057	0.592671	0.572356
TPM3	MYH11	ACTG2	18	1291.12	2.76631	0.815012	1	0.390075	0.880756	0.708548	0.62893	0.614744	0.7516	0.621837	0.690265	0.683172	0.686719	0.652505	0.656051	0.578178
TPM3	MYLK	MYH11	18	1225.67	2.4875	0.838298	1	0.387199	0.905921	0.637134	0.574651	0.561184	0.704331	0.567917	0.639491	0.632758	0.636124	0.600337	0.603704	0.565897
TPM3	ACTC1	MYH11	16	1139.28	1.91027	0.778664	1	0.346366	0.841477	0.489285	0.453555	0.450297	0.577333	0.451926	0.515444	0.513815	0.51463	0.482871	0.483685	0.502615
TPM3	MYL6	MYH11	18	1351.28	1.57073	0.759338	1	0.392719	0.820591	0.402317	0.399918	0.385071	0.506886	0.392494	0.453402	0.445978	0.44969	0.419236	0.422948	0.48724
TPM3	VCL	CALD1	21.6667	3759.94	1.1466	0.802128	1	0.566477	0.866833	0.293683	0.361882	0.303596	0.436971	0.332739	0.399426	0.370283	0.384855	0.351511	0.366082	0.515081
TPM3	MYL9	CALD1	17.3333	1083.68	1.83018	0.850059	1	0.368613	0.918631	0.468773	0.443733	0.434913	0.581237	0.439323	0.512485	0.508075	0.51028	0.473699	0.475904	0.522338
TPM3	ACTG2	CALD1	15.6667	669.156	2.19926	0.829551	1	0.319532	0.896468	0.563307	0.502363	0.505814	0.646597	0.504088	0.57448	0.576205	0.575343	0.540147	0.539284	0.52816
TPM3	MYLK	CALD1	15.6667	603.713	1.92045	0.852837	1	0.316655	0.921632	0.491893	0.448084	0.452253	0.599328	0.450168	0.523706	0.525791	0.524748	0.48798	0.486937	0.515879
TPM3	MYL6	CALD1	15.6667	729.314	1.00367	0.773877	1	0.322175	0.836303	0.257076	0.273351	0.27614	0.401883	0.274745	0.337617	0.339011	0.338314	0.306878	0.306181	0.437222
TPM3	VCL	MYL9	23.6667	4297.17	1.35532	0.794444	1	0.627124	0.85853	0.347145	0.41714	0.343692	0.474991	0.380416	0.446065	0.409342	0.427704	0.394879	0.413241	0.541533
TPM3	VCL	ACTG2	22	3882.64	1.7244	0.773936	1	0.578042	0.836367	0.441679	0.47577	0.414593	0.540351	0.445181	0.50806	0.477472	0.492766	0.461327	0.476621	0.547355
TPM3	MYLK	VCL	22	3817.2	1.44559	0.797222	1	0.575166	0.861532	0.370265	0.42149	0.361032	0.493082	0.391261	0.457286	0.427057	0.442172	0.409159	0.424274	0.535074
TPM3	DMD	VCL	24	6118.27	1.18055	0.787234	1	0.713331	0.850738	0.302379	0.405117	0.310117	0.439468	0.357617	0.422293	0.374793	0.398543	0.366205	0.389955	0.549945
TPM3	VCL	ACTN1	24.3333	5460.23	0.791773	0.764243	1	0.690584	0.825893	0.2028	0.324746	0.235434	0.358573	0.28009	0.34166	0.297004	0.319332	0.288547	0.310875	0.513153
TPM3	ACTN2	VCL	24	5367.72	1.81274	0.776359	1	0.680346	0.838986	0.464305	0.518315	0.431562	0.557975	0.474939	0.538145	0.494769	0.516457	0.484854	0.506542	0.579242
TPM3	MYL6	VCL	22	3942.8	0.528815	0.718262	1	0.580686	0.776202	0.135448	0.246757	0.184919	0.295636	0.215838	0.271197	0.240278	0.255737	0.228058	0.243518	0.456417
TPM3	MYL9	ACTG2	17.6667	1206.39	2.40799	0.821868	1	0.380179	0.888165	0.616769	0.557621	0.54591	0.684618	0.551766	0.62112	0.615264	0.618192	0.583515	0.586443	0.554612
TPM3	MYLK	MYL9	17.6667	1140.95	2.12917	0.845154	1	0.377303	0.91333	0.545355	0.503342	0.49235	0.637349	0.497846	0.570345	0.564849	0.567597	0.531347	0.534096	0.54233
TPM3	MYL6	MYL9	17.6667	1266.55	1.2124	0.766194	1	0.382823	0.828	0.310538	0.328609	0.316236	0.439903	0.322423	0.384256	0.37807	0.381163	0.350246	0.353339	0.463673
TPM3	MYLK	ACTG2	16	726.422	2.49825	0.824645	1	0.328221	0.891167	0.639889	0.561972	0.56325	0.702708	0.562611	0.63234	0.632979	0.63266	0.597795	0.597476	0.548153
TPM3	ACTC1	ACTG2	14	640.03	1.92102	0.765012	1	0.287387	0.826723	0.49204	0.440877	0.452363	0.57571	0.44662	0.508294	0.514037	0.511165	0.480328	0.477457	0.484871
TPM3	MYL6	ACTG2	16	852.023	1.58148	0.745686	1	0.333741	0.805838	0.405072	0.387239	0.387137	0.505263	0.387188	0.446251	0.4462	0.446225	0.416694	0.416719	0.469496
TPM3	MYLK	MYL6	16	786.58	1.30267	0.768972	1	0.330865	0.831002	0.333658	0.33296	0.333577	0.457994	0.333268	0.395477	0.395785	0.395631	0.364527	0.364372	0.457215
TPM3	ACTN2	DMD	20	4512.57	2.32155	0.81708	1	0.568689	0.882992	0.594629	0.588144	0.529305	0.666719	0.558724	0.627432	0.598012	0.612722	0.578368	0.593078	0.594911
TPM3	ACTC1	DMD	16	2875.65	1.37716	0.77831	1	0.422676	0.841093	0.352739	0.370223	0.347888	0.474828	0.359056	0.422526	0.411358	0.416942	0.385207	0.390791	0.48746
TPM3	ACTN2	ACTN1	20.3333	3854.53	1.93277	0.79409	1	0.545943	0.858147	0.49505	0.507773	0.454621	0.585824	0.481197	0.546799	0.520223	0.533511	0.50071	0.513998	0.558118
TPM3	CKB	ACTN1	14.3333	2178.7	0.93064	0.749113	1	0.361182	0.809542	0.238369	0.269072	0.26211	0.381162	0.265591	0.325117	0.321636	0.323377	0.293614	0.295354	0.435607
TPM3	ACTN2	TMOD1	14.6667	2091.42	2.38613	0.812884	1	0.363519	0.878457	0.611171	0.549258	0.541712	0.677993	0.545485	0.613625	0.609852	0.611739	0.577669	0.579555	0.54662
TPM3	ACTN2	ACTC1	16	2125.11	2.00936	0.767435	1	0.389691	0.829342	0.514666	0.483422	0.469333	0.593335	0.476377	0.538378	0.531334	0.534856	0.503855	0.507378	0.516758
TAC1	VIP	NPY	5.66667	2061.82	3.34028	0.849616	0	0.195551	0.918152	0.855561	0.690559	0.641671	0.871209	0.666115	0.780884	0.75644	0.768662	0.711277	0.723499	0.492316
PPP1R12A	MYH11	MYL9	18	1827.74	2.47821	0.813712	0	0.413659	0.879351	0.634754	0.57948	0.476066	0.695903	0.527773	0.637692	0.585984	0.611838	0.556879	0.582732	0.481941
PPP1R12A	RHOB	MYH11	14	1959.36	1.92552	0.776537	0	0.34537	0.839177	0.493191	0.456236	0.369893	0.579688	0.413065	0.517962	0.474791	0.496376	0.443928	0.465513	0.419435
PPP1R12A	MYH11	PPP1R12B	14.3333	1373.1	2.4885	0.800591	0	0.325777	0.865172	0.63739	0.559487	0.478043	0.694336	0.518765	0.626911	0.586189	0.60655	0.552477	0.572838	0.457085
PPP1R12A	MYLK	MYH11	16.3333	1347.77	2.56847	0.816489	0	0.361701	0.882353	0.657874	0.583831	0.493406	0.713994	0.538618	0.648912	0.6037	0.626306	0.571159	0.593765	0.475482
PPP1R12A	MYL6	MYH11	16.3333	1473.37	1.6517	0.73753	0	0.367221	0.797024	0.423057	0.409098	0.317293	0.516549	0.363195	0.462823	0.416921	0.439872	0.390058	0.413009	0.396825
PPP1R12A	RHOB	MYL9	13.6667	1874.64	1.56719	0.783392	0	0.335473	0.846586	0.401412	0.384927	0.301059	0.512705	0.342993	0.448816	0.406882	0.427849	0.374938	0.395905	0.395868
PPP1R12A	PPP1R12B	MYL9	14	1288.37	2.13017	0.807447	0	0.315881	0.872581	0.545611	0.488178	0.409208	0.627353	0.448693	0.557766	0.518281	0.538023	0.483487	0.503229	0.433518
PPP1R12A	MYLK	MYL9	16	1263.04	2.21015	0.823345	0	0.351805	0.889762	0.566095	0.512522	0.424571	0.647012	0.468547	0.579767	0.535791	0.557779	0.502169	0.524157	0.451915
PPP1R12A	MYL6	MYL9	16	1388.64	1.29337	0.744385	0	0.357325	0.804433	0.331277	0.337789	0.248458	0.449566	0.293124	0.393678	0.349012	0.371345	0.321068	0.343401	0.373259
PPP1R12A	PPP1R14A	RHOB	8.66667	1288.54	1.30763	0.760284	0	0.217123	0.821613	0.334929	0.305477	0.251197	0.4566	0.278337	0.381039	0.353898	0.367469	0.316118	0.329688	0.343416
PPP1R12A	PPP1R14A	PPP1R12B	9	702.277	1.87061	0.784338	0	0.19753	0.847608	0.479128	0.408728	0.359346	0.571248	0.384037	0.489988	0.465297	0.477642	0.424667	0.437013	0.381067
PPP1R12A	RHOB	PPP1R12B	10	1420	1.57748	0.770272	0	0.247592	0.832407	0.404048	0.364934	0.303036	0.511138	0.333985	0.438036	0.407087	0.422561	0.370536	0.38601	0.371012
PPP1R12A	MYL6	RHOB	12	1520.27	0.740683	0.70721	0	0.289035	0.764259	0.189715	0.214545	0.142286	0.333351	0.178415	0.273948	0.237818	0.255883	0.208117	0.226181	0.310752
PPP1R12A	MYLK	PPP1R12B	12.3333	808.405	2.22044	0.810225	0	0.263923	0.875583	0.568731	0.492529	0.426548	0.645444	0.459538	0.568986	0.535996	0.552491	0.497767	0.514262	0.427059
PPP1R12A	PRKG1	PPP1R12B	12.3333	1695.22	1.75219	0.808038	0	0.302897	0.87322	0.448795	0.412321	0.336597	0.554901	0.374459	0.483611	0.445749	0.46468	0.410104	0.429035	0.406228
PPP1R12A	MYL6	PPP1R12B	12.3333	934.007	1.30366	0.731265	0	0.269443	0.790254	0.333913	0.317796	0.250435	0.447998	0.284115	0.382897	0.349217	0.366057	0.316666	0.333506	0.348402
PPP1R12A	MYLK	MYL6	14.3333	908.674	1.38364	0.747163	0	0.305367	0.807434	0.354398	0.34214	0.265798	0.467657	0.303969	0.404898	0.366727	0.385813	0.335348	0.354434	0.3668
ATP1A2	PLN	FXYD1	5.66667	575.959	3.15482	0.875887	0	0.130251	0.946541	0.808059	0.638607	0.606044	0.84268	0.622326	0.740643	0.724362	0.732503	0.673344	0.681484	0.471213
ATP1A2	PLN	PRKG1	9.33333	1469.58	2.87591	0.877778	0	0.237425	0.948585	0.73662	0.611822	0.552465	0.789612	0.582143	0.700717	0.671039	0.685878	0.626591	0.64143	0.480658
FGF7	HGF	KIT	9.33333	1264.01	1.77481	0.870508	3	0.22839	0.940729	0.454591	0.398041	0.590943	0.576125	0.494492	0.487083	0.583534	0.535308	0.539013	0.490787	0.655928
FGF7	FGFR1	KL	7	965.21	1.6795	0.879965	2	0.172049	0.950948	0.430179	0.365646	0.489301	0.560371	0.427473	0.463009	0.524836	0.493922	0.476155	0.445241	0.554961
FGF7	FGFR1	HGF	9.33333	1349.24	1.84095	0.890839	3	0.232136	0.9627	0.471531	0.411682	0.603648	0.594323	0.507665	0.503003	0.598986	0.550994	0.553326	0.505334	0.666592
GSN	FLNA	VCL	18.3333	5817.96	1.44256	0.810934	0	0.595195	0.876349	0.369491	0.425917	0.277118	0.496205	0.351517	0.461061	0.386662	0.423861	0.369089	0.406289	0.460259
FLNA	ITGB3	VCL	25.3333	8328.5	1.47994	0.81182	0	0.835157	0.877307	0.379063	0.493087	0.284298	0.503624	0.388692	0.498356	0.393961	0.446158	0.391327	0.443524	0.522882
FLNA	TLN1	VCL	24	6839.35	1.48435	0.825827	0	0.745021	0.892444	0.380193	0.4714	0.285145	0.508256	0.378273	0.489828	0.396701	0.443264	0.387487	0.43405	0.504415
FLNA	MAPK10	ROR2	9.33333	4261.56	2.22241	0.902423	1	0.360127	0.975219	0.569237	0.516959	0.510261	0.670732	0.51361	0.593846	0.590497	0.592171	0.552053	0.553728	0.559479
FLNA	ITGB3	CAV1	22.6667	10662.3	1.5521	0.845745	0	0.88834	0.913968	0.397546	0.520245	0.29816	0.526652	0.409202	0.523448	0.412406	0.467927	0.410804	0.466325	0.549964
FLNA	TLN1	ITGB3	21.6667	6132.75	1.62898	0.85526	0	0.670757	0.924251	0.417238	0.480618	0.312929	0.543991	0.396773	0.512305	0.42846	0.470382	0.412617	0.454539	0.503062
FLNA	CAMK2A	FLNC	16.6667	7993.67	2.76991	0.85591	1	0.659949	0.924954	0.709468	0.697088	0.615435	0.76334	0.656261	0.730214	0.689387	0.709801	0.672824	0.693238	0.656926
FLNA	PRNP	CAV1	18.3333	10163.9	1.46733	0.843262	0	0.786192	0.911286	0.375835	0.478424	0.281876	0.509697	0.38015	0.494061	0.395787	0.444924	0.387968	0.437105	0.518328
KCNH2	KCNQ4	KCNB1	7	775.402	2.1963	0.81117	0	0.163707	0.876605	0.562548	0.462838	0.421911	0.641062	0.442375	0.55195	0.531487	0.541718	0.486931	0.497162	0.400715
KCNH2	KCNB1	KCNA1	8.66667	1174.23	3.30001	0.859752	0	0.212099	0.929105	0.845247	0.68696	0.633935	0.866211	0.660447	0.776585	0.750073	0.763329	0.70526	0.718516	0.496613
KCNH2	KCNQ4	KCNE4	6.33333	730.734	1.56439	0.818617	0	0.149398	0.884652	0.400694	0.33787	0.300521	0.521684	0.319195	0.429777	0.411102	0.420439	0.365149	0.374486	0.358686
KCNH2	KCNQ4	KCNA1	8.66667	1137.6	2.52462	0.821454	0	0.210489	0.887718	0.646641	0.537603	0.484981	0.70691	0.511292	0.622257	0.595945	0.609101	0.553619	0.566774	0.436212
KCNH2	CAV1	KCNMA1	15.3333	6539.87	1.9132	0.839716	0	0.571366	0.907454	0.490037	0.510369	0.367528	0.594391	0.438948	0.55238	0.480959	0.51667	0.459954	0.495664	0.492214
KCNH2	CAV1	CACNA1C	20.6667	9895.44	1.57496	0.832801	0	0.817602	0.899981	0.403402	0.506952	0.302552	0.527547	0.404752	0.517249	0.415049	0.466149	0.409901	0.461001	0.530246
KCNH2	KCNA1	KCNMA1	10	1331.44	3.13868	0.864421	0	0.243699	0.934151	0.803923	0.663867	0.602942	0.83648	0.633405	0.750174	0.719711	0.734942	0.676558	0.691789	0.495443
KCNH2	CACNA1C	KCNMA1	15	4482.01	2.31079	0.851891	0	0.474754	0.920611	0.591872	0.562593	0.443904	0.674057	0.503248	0.618325	0.55898	0.588653	0.531114	0.560787	0.496809
KCNH2	KCND3	CACNA1C	14.3333	4555.89	1.61407	0.815071	0	0.465655	0.88082	0.41342	0.426479	0.310065	0.53027	0.368272	0.478374	0.420168	0.449271	0.39422	0.423323	0.439974
KCNH2	ANK2	CACNA1C	15	5275.97	2.15314	0.859279	0	0.509647	0.928594	0.551492	0.541031	0.413619	0.645768	0.477325	0.593399	0.529693	0.561546	0.503509	0.535362	0.497433
KCNH2	SCN4B	ANK2	9	1851.26	2.11511	0.860875	0	0.248026	0.930319	0.541752	0.46832	0.406314	0.638894	0.437317	0.553607	0.522604	0.538105	0.479961	0.495462	0.430024
CAMK2A	GRIN2A	NOS1	14.3333	6459.23	2.19168	0.821868	1	0.549303	0.888165	0.561364	0.558348	0.504356	0.643064	0.531352	0.600706	0.57371	0.587208	0.552531	0.566029	0.583041
CAMK2A	GRIN2A	NEFL	13.3333	6095.55	1.98953	0.834338	1	0.514802	0.901641	0.509586	0.51089	0.465523	0.6076	0.488206	0.559245	0.536561	0.547903	0.512384	0.523726	0.564841
CAMK2A	GRIN2A	MECP2	11.6667	5463.29	1.54632	0.819267	1	0.456151	0.885355	0.396067	0.411088	0.380383	0.518389	0.395736	0.464738	0.449386	0.457062	0.422561	0.430237	0.517726
CAMK2A	GRIN2A	DLG2	14.3333	7813.73	2.02958	0.84604	1	0.608831	0.914288	0.519847	0.542093	0.473218	0.618457	0.507655	0.580275	0.545837	0.563056	0.526746	0.543965	0.594075
CAMK2A	ACTN2	GRIN2A	17.3333	7101.66	2.76838	0.825591	1	0.633092	0.892189	0.709077	0.690081	0.615141	0.754855	0.652611	0.722468	0.684998	0.703733	0.668804	0.687539	0.641923
CAMK2A	MEF2A	HDAC4	11.3333	5513.07	1.21102	0.805851	1	0.452165	0.870856	0.310183	0.345679	0.315971	0.450352	0.330825	0.398015	0.383161	0.390588	0.356993	0.36442	0.491635
CAMK2A	HDAC4	MEF2D	12.3333	6042.68	1.12655	0.777955	1	0.493959	0.84071	0.288547	0.3399	0.299744	0.426588	0.319822	0.383244	0.363166	0.373205	0.341494	0.351533	0.489138
CAMK2A	ADCY5	ADCY2	19.6667	7075.06	2.3632	0.848463	3	0.675133	0.916906	0.605297	0.622756	0.703972	0.683199	0.663364	0.652977	0.693586	0.673282	0.678475	0.658171	0.799334
CAMK2A	ADCY5	CACNA1C	22.3333	10147	2.38885	0.852364	2	0.859523	0.921122	0.611866	0.67378	0.625566	0.68918	0.649673	0.68148	0.657373	0.669426	0.653523	0.665577	0.764794
CAMK2A	MEF2A	MEF2D	12	6198.73	1.13518	0.812825	1	0.494645	0.878393	0.290759	0.341731	0.301403	0.437668	0.321567	0.389699	0.369535	0.379617	0.345551	0.355633	0.499283
CAMK2A	CACNA1C	NOS1	19	9148.54	2.25349	0.831974	1	0.753913	0.899087	0.577195	0.621375	0.51623	0.657668	0.568802	0.639522	0.586949	0.613235	0.577876	0.604162	0.640882
CAMK2A	NEFL	DLG2	14	7615.33	1.9838	0.848641	1	0.593939	0.917098	0.508119	0.529574	0.464423	0.610364	0.496998	0.569969	0.537393	0.553681	0.517196	0.533484	0.588122
CAMK2A	NEFL	MAPT	14	7902.63	1.89956	0.825827	1	0.606565	0.892444	0.486544	0.516549	0.448241	0.588019	0.482395	0.552284	0.51813	0.535207	0.500262	0.517339	0.579722
CAMK2A	ACTN1	CACNA1C	22.3333	9883.48	1.80922	0.823582	1	0.847941	0.890017	0.463404	0.559538	0.430886	0.570057	0.495212	0.564798	0.500472	0.532635	0.497842	0.530005	0.633674
CAMK2A	ACTN2	ACTN1	21.3333	8001.87	2.48048	0.807329	1	0.746729	0.872453	0.635335	0.663184	0.559835	0.694615	0.611509	0.678899	0.627225	0.653062	0.619367	0.645204	0.646963
CAMK2A	ACTN2	DLG2	18	8621.43	2.76265	0.839894	1	0.712229	0.907645	0.70761	0.708765	0.614041	0.757619	0.661403	0.733192	0.68583	0.709511	0.673616	0.697297	0.665204
CAMK2A	CACNA2D1	CACNA1C	16.6667	8164.59	1.94554	0.850177	1	0.66746	0.918758	0.498321	0.540605	0.457074	0.60343	0.49884	0.572018	0.530252	0.551135	0.514546	0.535429	0.604468
SDC3	FGF2	CSPG4	9.33333	2097.06	1.56565	0.831383	1	0.265001	0.898448	0.401016	0.367013	0.384096	0.525374	0.375554	0.446193	0.454735	0.450464	0.415145	0.410874	0.47445
SDC3	FGF2	GDNF	10.3333	1824.29	1.09694	0.810284	1	0.271532	0.875647	0.280964	0.278606	0.294057	0.429635	0.286331	0.354121	0.361846	0.357983	0.324089	0.320226	0.440369
SDC3	FGF2	DCN	9.33333	1889.82	1.66887	0.876359	1	0.255893	0.947052	0.427455	0.384565	0.403925	0.557355	0.394245	0.47096	0.48064	0.4758	0.437442	0.432602	0.490934
SCN4B	ANK2	NFASC	6.66667	1231.6	2.43326	0.888357	0	0.177583	0.960018	0.623242	0.511827	0.467431	0.707436	0.489629	0.609631	0.587433	0.598532	0.538531	0.54963	0.440211
CHL1	FGF2	GDNF	9.66667	1880.74	1.27652	0.800827	1	0.261667	0.865428	0.326962	0.310638	0.328554	0.461578	0.319596	0.386108	0.395066	0.390587	0.357331	0.352852	0.446847
LPP	VCL	ACTN1	19.3333	5060.38	1.21964	0.77565	0	0.580419	0.838219	0.312392	0.379398	0.234294	0.443849	0.306846	0.411624	0.339071	0.375347	0.322959	0.359235	0.432757
LPP	PALLD	ACTN1	9.33333	1848.4	1.54009	0.821099	0	0.254073	0.887335	0.394471	0.359372	0.295853	0.517687	0.327612	0.438529	0.40677	0.42265	0.367191	0.383071	0.38397
CNTN1	CNTNAP1	NFASC	4.66667	403.073	2.53138	0.888416	0	0.104134	0.960082	0.648374	0.512314	0.48628	0.726301	0.499297	0.619307	0.606291	0.612799	0.552794	0.559302	0.428147
CACNB2	HSPA2	CACNA1C	13	4166.15	1.79039	0.829019	0	0.423835	0.895893	0.45858	0.449894	0.343935	0.567908	0.396915	0.508901	0.455922	0.482412	0.426418	0.452908	0.444577
CACNB2	CACNA2D1	HSPA2	6.66667	658.163	1.577	0.827246	0	0.152382	0.893977	0.403924	0.341038	0.302943	0.526437	0.32199	0.433738	0.41469	0.424214	0.36834	0.377864	0.362571
CACNB2	HSPA2	CACNA1H	8	729.525	1.80428	0.810697	0	0.180209	0.876094	0.462138	0.391656	0.346604	0.565627	0.36913	0.478642	0.456115	0.467379	0.412623	0.423886	0.37961
CACNB2	CACNA2D1	CACNA1C	11.6667	3689.4	1.86837	0.859338	0	0.378191	0.928658	0.478553	0.453462	0.358914	0.591079	0.406188	0.522271	0.474997	0.498634	0.440593	0.46423	0.446351
CACNB2	CACNA1C	GNG11	12.3333	3904.93	1.73463	0.851655	1	0.400009	0.920355	0.444297	0.433225	0.416556	0.563312	0.424891	0.498269	0.489934	0.494101	0.457413	0.46158	0.524499
CACNB2	CACNA1C	CACNA1H	13	3760.76	2.09565	0.84279	0	0.406019	0.910775	0.536767	0.50408	0.402576	0.630269	0.453328	0.567175	0.516422	0.541799	0.484875	0.510251	0.46339
CACNB2	CACNA2D1	CACNA1H	6.66667	252.767	1.88226	0.841017	0	0.134565	0.908859	0.482111	0.395224	0.361583	0.588798	0.378404	0.492011	0.47519	0.483601	0.426797	0.435207	0.381384
HSPB8	BAG3	HSPB7	7.66667	1030.35	2.13846	0.779669	0	0.187257	0.842562	0.547734	0.457615	0.410801	0.621441	0.434208	0.539528	0.516121	0.527825	0.475165	0.486868	0.394389
HSPB8	BAG3	CRYAB	7.33333	953.273	1.80252	0.776537	0	0.177697	0.839177	0.461687	0.390689	0.346265	0.556059	0.368477	0.473374	0.451162	0.462268	0.40982	0.420926	0.36964
HSPB8	MYOT	BAG3	8	977.542	1.67298	0.774409	0	0.191109	0.836878	0.428509	0.369159	0.321382	0.530601	0.34527	0.44988	0.425991	0.437936	0.385631	0.397575	0.364124
TENC1	DLC1	CAV1	10.3333	5646.47	1.34073	0.892139	0	0.43951	0.964106	0.343407	0.367432	0.257555	0.498581	0.312494	0.433007	0.378068	0.405537	0.345281	0.37275	0.436755
ACTN2	TPM1	DES	15	2332.08	3.23842	0.793085	0	0.380268	0.857061	0.829472	0.717171	0.622104	0.836369	0.669637	0.77677	0.729236	0.753003	0.699437	0.723204	0.5167
ACTN2	TPM1	VCL	25.3333	5613.61	2.22548	0.76909	0	0.715843	0.83113	0.570022	0.606477	0.427516	0.635299	0.516997	0.620888	0.531407	0.576148	0.524202	0.568942	0.529249
ACTN2	LDB3	TPM1	19	3543.51	3.2063	0.809279	0	0.507582	0.874561	0.821243	0.742828	0.615932	0.834572	0.67938	0.7887	0.725252	0.756976	0.702316	0.73404	0.550847
ACTN2	TPM1	DMD	21.3333	4758.46	2.73429	0.809811	0	0.604187	0.875136	0.700345	0.676306	0.525259	0.744043	0.600782	0.710174	0.634651	0.672412	0.617717	0.655478	0.544917
ACTN2	TPM1	ACTN1	21.6667	4100.42	2.34551	0.78682	0	0.58144	0.850291	0.600767	0.595935	0.450575	0.663148	0.523255	0.629541	0.556861	0.593201	0.540058	0.576398	0.508124
ACTN2	TPM1	TMOD1	16	2337.31	2.79887	0.805615	0	0.399017	0.870601	0.716888	0.63742	0.537666	0.755316	0.587543	0.696368	0.646491	0.671429	0.617017	0.641955	0.496626
ACTN2	TLN1	TPM1	21.6667	3417.86	2.37452	0.81253	0	0.551443	0.878074	0.608196	0.594008	0.456147	0.675666	0.525078	0.634837	0.565907	0.600372	0.545492	0.579957	0.509428
ACTN2	ACTC1	TPM1	17.3333	2371	2.4221	0.760165	0	0.425189	0.821486	0.620382	0.571584	0.465287	0.670658	0.518435	0.621121	0.567972	0.594547	0.543204	0.569778	0.466764
ACTN2	GRIN2A	DLG2	14.3333	4931.86	2.73257	0.84539	0	0.482178	0.913585	0.699904	0.645473	0.524928	0.753324	0.5852	0.699398	0.639126	0.669262	0.612163	0.642299	0.523917
ACTN2	LDB3	VCL	22.6667	6168.79	2.90324	0.799291	0	0.69086	0.863767	0.743619	0.730429	0.557714	0.773656	0.644072	0.752043	0.665685	0.708864	0.654879	0.698057	0.574561
ACTN2	DMD	VCL	25	7383.74	2.43123	0.799823	0	0.787464	0.864342	0.622722	0.663907	0.467041	0.683127	0.565474	0.673517	0.575084	0.6243	0.570279	0.619496	0.568632
ACTN2	TNS1	VCL	21.3333	5008.26	2.55286	0.816371	0	0.615165	0.882225	0.653875	0.644198	0.490407	0.710963	0.567302	0.67758	0.600685	0.639133	0.583994	0.622441	0.537816
ACTN2	VCL	ACTN1	25.3333	6725.7	2.04246	0.776832	0	0.764718	0.839497	0.523143	0.583537	0.392357	0.602232	0.487947	0.592884	0.497295	0.545089	0.492621	0.540416	0.531839
ACTN2	TLN1	VCL	25.3333	6043.15	2.07146	0.802541	0	0.734721	0.86728	0.530573	0.58161	0.39793	0.61475	0.48977	0.59818	0.50634	0.55226	0.498055	0.543975	0.533143
ACTN2	ITGA1	VCL	24.6667	6926.86	2.08552	0.79409	0	0.761212	0.858147	0.534173	0.590933	0.40063	0.615166	0.495781	0.60305	0.507898	0.555474	0.50184	0.549416	0.538383
ACTN2	LDB3	MYOZ2	14.6667	2983.22	3.36457	0.821661	0	0.402712	0.887941	0.861782	0.747014	0.646336	0.868322	0.696675	0.807668	0.757329	0.782499	0.727002	0.752172	0.538109
ACTN2	ACTN1	MYOZ2	17.3333	3540.13	2.50379	0.799202	0	0.47657	0.863671	0.641306	0.600122	0.480979	0.696897	0.540551	0.648509	0.588938	0.618724	0.564744	0.59453	0.495387
ACTN2	LDB3	ACTN1	19	4655.6	3.02327	0.817021	0	0.556457	0.882928	0.774364	0.719887	0.580773	0.801505	0.65033	0.760696	0.691139	0.725918	0.670735	0.705513	0.553437
ACTN2	LDB3	PDLIM3	12.6667	2892.83	3.4633	0.863416	0	0.361702	0.933065	0.88707	0.755728	0.665302	0.898569	0.710515	0.827148	0.781935	0.804542	0.746225	0.768832	0.545459
ACTN2	DMD	ITGA1	20.6667	6071.7	2.59433	0.834811	0	0.649556	0.902152	0.664497	0.660761	0.498372	0.723911	0.579567	0.692336	0.611142	0.651739	0.595354	0.635951	0.554051
ACTN2	ACTC1	DMD	17	4141.12	2.62785	0.790898	0	0.496809	0.854698	0.673082	0.629014	0.504812	0.718486	0.566913	0.67375	0.611649	0.642699	0.589281	0.620331	0.506147
ACTN2	TNS1	ACTN1	17.6667	3495.07	2.6729	0.834102	0	0.480762	0.901386	0.684621	0.633656	0.513465	0.738812	0.573561	0.686234	0.626139	0.656186	0.59985	0.629897	0.516692
ACTN2	TLN1	TNS1	17.6667	2812.51	2.7019	0.859811	0	0.450765	0.929169	0.69205	0.631729	0.519038	0.75133	0.575383	0.691529	0.635184	0.663357	0.605284	0.633456	0.517996
ACTN2	ITGA1	TNS1	17	3696.23	2.71596	0.851359	0	0.477257	0.920036	0.69565	0.641052	0.521738	0.751747	0.581395	0.696399	0.636742	0.666571	0.609069	0.638897	0.523236
ACTN2	TLN1	ACTN1	21.6667	4529.95	2.1915	0.820272	0	0.600317	0.886441	0.561318	0.571068	0.420988	0.642599	0.496028	0.606833	0.531794	0.569313	0.513911	0.551431	0.512019
ACTN2	ITGA1	ACTN1	21	5413.67	2.20555	0.81182	0	0.626809	0.877307	0.564918	0.580391	0.423689	0.643015	0.50204	0.611703	0.533352	0.572528	0.517696	0.556872	0.517259
ACTN2	TLN1	ITGA1	21	4731.11	2.23456	0.83753	0	0.596812	0.90509	0.572348	0.578464	0.429261	0.655534	0.503862	0.616999	0.542397	0.579698	0.52313	0.560431	0.518563
ACTC1	TPM1	DMD	17.3333	3121.54	1.7899	0.77104	0	0.458174	0.833238	0.458456	0.458385	0.343842	0.552151	0.401114	0.505268	0.447997	0.476632	0.424555	0.453191	0.437467
ACTC1	TPM1	MYH11	17.3333	1385.17	2.32301	0.771395	0	0.381863	0.833621	0.595002	0.541717	0.446251	0.654656	0.493984	0.598187	0.550454	0.57432	0.522219	0.546085	0.452621
ACTC1	TPM1	ACTG2	15.3333	885.922	2.33376	0.757742	0	0.322885	0.818867	0.597756	0.529038	0.448317	0.653034	0.488678	0.591036	0.550676	0.570856	0.519677	0.539857	0.434877
ACTC1	MYH11	ACTG2	15	919.676	3.07261	0.78883	0	0.318196	0.852462	0.787002	0.6698	0.590251	0.803367	0.630026	0.736584	0.696809	0.716696	0.663418	0.683305	0.489415
MYOT	ACTN1	MYOZ2	12.3333	2019.91	1.74704	0.809604	0	0.317166	0.874912	0.447478	0.4149	0.335608	0.554336	0.375254	0.484618	0.444972	0.464795	0.410113	0.429936	0.409889
MYOT	LDB3	ACTN1	14	3135.38	2.26653	0.827423	0	0.397053	0.894169	0.580536	0.534665	0.435402	0.658944	0.485034	0.596805	0.547173	0.571989	0.516104	0.540919	0.46794
MYOT	FLNC	BAG3	10	1623.79	2.00845	0.770745	0	0.256548	0.832918	0.514432	0.449961	0.385824	0.594054	0.417893	0.522007	0.489939	0.505973	0.453916	0.46995	0.400975
MYOT	LDB3	BAG3	10.6667	1871.29	1.99269	0.767908	0	0.27977	0.829852	0.510396	0.45274	0.382797	0.59026	0.417768	0.5215	0.486528	0.504014	0.452148	0.469634	0.405005
MYOT	FLNC	MYOZ2	9	1215.5	2.62358	0.8349	0	0.220086	0.902248	0.67199	0.559014	0.503992	0.729554	0.531503	0.644284	0.616773	0.630529	0.574138	0.587894	0.448581
MYOT	FLNC	LDB3	10.6667	2330.97	3.14307	0.852719	0	0.299972	0.921505	0.805048	0.678779	0.603786	0.834163	0.641283	0.756471	0.718974	0.737723	0.680129	0.698877	0.506631
MYOT	LDB3	MYOZ2	9.66667	1462.99	2.60782	0.832063	0	0.243308	0.899182	0.667954	0.561792	0.500965	0.725761	0.531379	0.643777	0.613363	0.62857	0.572371	0.587578	0.452611
PLN	ATP2B4	PRKG1	9	1464.73	2.21404	0.873227	0	0.231039	0.943667	0.567091	0.483078	0.425318	0.661235	0.454198	0.572157	0.543277	0.557717	0.498738	0.513177	0.435449
PLN	ATP2B4	NOS1	8	1486.01	2.47274	0.850827	0	0.213455	0.919461	0.633353	0.528379	0.475015	0.70488	0.501697	0.616629	0.589947	0.603288	0.545822	0.559163	0.441567
PLN	SLC8A1	PRKG1	9	1345.32	2.03813	0.866962	0	0.225791	0.936897	0.522036	0.447975	0.391527	0.625751	0.419751	0.536863	0.508639	0.522751	0.464195	0.478307	0.421181
KCNQ4	KCNB1	KCNA1	5.66667	459.582	3.2423	0.846277	0	0.125136	0.914543	0.830465	0.654133	0.622849	0.851484	0.638491	0.752808	0.737166	0.744987	0.687828	0.695649	0.467536
ST3GAL3	OMD	PRELP	3.33333	462	2.28963	0.906974	0	0.0820324	0.980137	0.586453	0.460348	0.43984	0.684874	0.450094	0.572611	0.562357	0.567484	0.506225	0.511352	0.412155
TLN1	TPM1	MYH11	21.6667	2432.04	2.27543	0.823759	0	0.508118	0.890209	0.582816	0.564141	0.437112	0.659664	0.500627	0.611903	0.548388	0.580145	0.524507	0.556265	0.495286
TLN1	TPM1	CALD1	19.3333	1810.08	1.70838	0.838298	0	0.437574	0.905921	0.437574	0.437574	0.328181	0.554661	0.382878	0.496118	0.441421	0.468769	0.412149	0.439498	0.445267
TLN1	TPM1	VCL	25.6667	5023.57	1.23352	0.782683	0	0.696085	0.84582	0.315947	0.410981	0.23696	0.448415	0.323971	0.429698	0.342687	0.386193	0.333329	0.376834	0.464463
TLN1	TPM1	MYL9	21.3333	2347.31	1.9171	0.830615	0	0.498222	0.897618	0.491036	0.492833	0.368277	0.592682	0.430555	0.542757	0.480479	0.511618	0.455517	0.486656	0.471719
TLN1	TPM1	MYLK	19.6667	1867.34	2.00737	0.833392	0	0.446264	0.90062	0.514157	0.497183	0.385617	0.610772	0.4414	0.553978	0.498195	0.526086	0.469798	0.497689	0.46526
TLN1	TPM1	ACTN1	22	3510.38	1.35355	0.800414	0	0.561682	0.864981	0.346692	0.400439	0.260019	0.476264	0.330229	0.438352	0.368141	0.403246	0.349185	0.38429	0.443338
TLN1	TPM1	MYL6	19.6667	1992.94	1.0906	0.754433	0	0.451784	0.81529	0.279339	0.32245	0.209504	0.413327	0.265977	0.367889	0.311416	0.339652	0.288696	0.316933	0.386603
TLN1	VCL	RAP1A	21	5172.6	0.837602	0.749941	0	0.616215	0.810436	0.214539	0.314958	0.160904	0.363513	0.237931	0.339235	0.262209	0.300722	0.25007	0.288583	0.410297
TLN1	DLC1	TNS1	12	1167.84	1.78987	0.895981	0	0.273547	0.968257	0.458448	0.412222	0.343836	0.5859	0.378029	0.499061	0.464868	0.481965	0.421449	0.438545	0.425063
TLN1	MYH11	CALD1	19	1843.83	2.44723	0.869385	0	0.432885	0.939516	0.62682	0.578336	0.470115	0.704994	0.524226	0.641665	0.587555	0.61461	0.55589	0.582945	0.499805
TLN1	MYH11	VCL	25.3333	5057.32	1.97237	0.813771	0	0.691395	0.879415	0.505192	0.551743	0.378894	0.598748	0.465319	0.575245	0.488821	0.532033	0.47707	0.520282	0.519001
TLN1	MYH11	MYL9	21	2381.07	2.65596	0.861702	0	0.493532	0.931213	0.680282	0.633595	0.510211	0.743015	0.571903	0.688305	0.626613	0.657459	0.599258	0.630104	0.526257
TLN1	MYLK	MYH11	19.3333	1901.1	2.74622	0.86448	0	0.441574	0.934215	0.703402	0.637945	0.527552	0.761105	0.582748	0.699525	0.644328	0.671927	0.613538	0.641137	0.519798
TLN1	MYL6	MYH11	19.3333	2026.7	1.82945	0.78552	0	0.447094	0.848885	0.468585	0.463212	0.351439	0.56366	0.407325	0.513436	0.457549	0.485493	0.432437	0.460381	0.441141
TLN1	VCL	CALD1	23	4435.36	1.40532	0.82831	0	0.620852	0.895127	0.359951	0.425176	0.269963	0.493745	0.34757	0.459461	0.381854	0.420657	0.364712	0.403515	0.468982
TLN1	MYL9	CALD1	18.6667	1759.1	2.08891	0.876241	0	0.422988	0.946925	0.535041	0.507028	0.401281	0.638012	0.454154	0.57252	0.519646	0.546083	0.4869	0.513337	0.476238
TLN1	MYLK	CALD1	17	1279.14	2.17917	0.879019	0	0.37103	0.949927	0.558161	0.511378	0.418621	0.656102	0.464999	0.58374	0.537362	0.560551	0.50118	0.52437	0.469779
TLN1	MYL6	CALD1	17	1404.74	1.2624	0.800059	0	0.37655	0.864597	0.323343	0.336645	0.242508	0.458657	0.289576	0.397651	0.350582	0.374117	0.320079	0.343614	0.391123
TLN1	PIP5K1C	VCL	20.3333	5408.44	0.929603	0.799232	0	0.614234	0.863703	0.238103	0.332136	0.178578	0.394503	0.255357	0.36332	0.28654	0.32493	0.270949	0.309338	0.42901
TLN1	VCL	MYL9	25	4972.59	1.61405	0.820626	0	0.681499	0.886824	0.413413	0.480434	0.31006	0.531766	0.395247	0.5061	0.420913	0.463506	0.40808	0.450673	0.495434
TLN1	ITGB3	VCL	27	6942.24	1.07509	0.802128	0	0.805098	0.866833	0.275368	0.4078	0.206526	0.423234	0.307163	0.415517	0.31488	0.365199	0.311021	0.36134	0.486825
TLN1	MYLK	VCL	23.3333	4492.62	1.70431	0.823404	0	0.629541	0.889826	0.436533	0.484785	0.3274	0.549856	0.406092	0.517321	0.438628	0.477974	0.42236	0.461706	0.488975
TLN1	TNS1	VCL	21.6667	4418.21	1.5609	0.829965	0	0.595407	0.896915	0.3998	0.448702	0.29985	0.524079	0.374276	0.486391	0.411965	0.449178	0.39312	0.430333	0.473031
TLN1	VCL	ACTN1	25.6667	6135.66	1.0505	0.790426	0	0.744959	0.854187	0.269068	0.388041	0.201801	0.415348	0.294921	0.401694	0.308574	0.355134	0.301748	0.348308	0.467053
TLN1	VCL	SORBS1	20.6667	6264.79	1.60531	0.809397	0	0.658042	0.874689	0.411174	0.472891	0.308381	0.527053	0.390636	0.499972	0.417717	0.458844	0.404176	0.445304	0.485976
TLN1	ITGA1	VCL	25	6336.81	1.09356	0.807683	0	0.741454	0.872836	0.280098	0.395437	0.210074	0.428283	0.302755	0.41186	0.319178	0.365519	0.310967	0.357308	0.473597
TLN1	MYL6	VCL	23.3333	4618.23	0.787538	0.744444	0	0.635061	0.804496	0.201716	0.310052	0.151287	0.352411	0.230669	0.331231	0.251849	0.29154	0.241259	0.28095	0.410318
TLN1	MYLK	MYL9	19	1816.37	2.3879	0.871336	0	0.431678	0.941624	0.611623	0.566637	0.458717	0.694123	0.512677	0.63038	0.57642	0.6034	0.544548	0.571528	0.496231
TLN1	MYL9	SORBS1	16.3333	3588.54	2.28889	0.857329	0	0.460179	0.926487	0.586264	0.554742	0.439698	0.671319	0.49722	0.613031	0.555509	0.58427	0.526364	0.555126	0.493232
TLN1	MYL6	MYL9	19	1941.97	1.47112	0.792376	0	0.437198	0.856294	0.376805	0.391903	0.282604	0.496678	0.337254	0.44429	0.389641	0.416966	0.363447	0.390772	0.417574
TLN1	TNS1	ITGB3	19.3333	3711.61	1.70553	0.859397	0	0.521143	0.928722	0.436845	0.45792	0.327634	0.559814	0.392777	0.508867	0.443724	0.476295	0.41825	0.450822	0.471677
TLN1	ITGB3	ACTN1	23.3333	5429.05	1.19513	0.819858	0	0.670695	0.885993	0.306113	0.397258	0.229585	0.451083	0.313422	0.424171	0.340334	0.382252	0.326878	0.368796	0.4657
TLN1	ITGA7	ITGB3	19.6667	3776.78	1.59196	0.848404	0	0.53018	0.916842	0.407755	0.438361	0.305816	0.535027	0.372089	0.486694	0.420422	0.453558	0.396255	0.429392	0.463694
TLN1	ITGA1	ITGB3	22.6667	5630.21	1.23819	0.837116	0	0.66719	0.904643	0.317143	0.404655	0.237857	0.464018	0.321256	0.434336	0.350937	0.392637	0.336097	0.377796	0.472244
TLN1	MYLK	ITGA1	19	3180.59	1.86741	0.858392	0	0.491633	0.927636	0.478308	0.481639	0.358731	0.59064	0.420185	0.53614	0.474686	0.505413	0.447435	0.478162	0.474394
TLN1	MYLK	MYL6	17.3333	1462	1.56139	0.795154	0	0.38524	0.859296	0.399926	0.396254	0.299944	0.514768	0.348099	0.455511	0.407356	0.431434	0.377728	0.401805	0.411115
TLN1	TNS1	ACTN1	18	2905.02	1.68094	0.847695	0	0.461004	0.916076	0.430545	0.43816	0.322909	0.551928	0.380535	0.495044	0.437419	0.466231	0.408977	0.437789	0.451906
TLN1	ITGA1	TNS1	17.3333	3106.18	1.724	0.864953	0	0.457498	0.934726	0.441575	0.445556	0.331182	0.564863	0.388369	0.50521	0.448022	0.476616	0.418196	0.446789	0.45845
TLN1	ITGA7	ACTN1	18.3333	2970.2	1.56736	0.836702	0	0.470041	0.904196	0.401456	0.418602	0.301092	0.527141	0.359847	0.472871	0.414116	0.443494	0.386982	0.416359	0.443923
TLN1	ITGA1	ACTN1	21.3333	4823.62	1.21359	0.825414	0	0.607051	0.891997	0.310843	0.384895	0.233132	0.456132	0.309014	0.420513	0.344632	0.382573	0.326823	0.364764	0.452473
TLN1	ITGA1	SORBS1	16.3333	4952.76	1.7684	0.844385	0	0.520133	0.912499	0.452949	0.469745	0.339712	0.567837	0.404728	0.518791	0.453774	0.486283	0.429251	0.46176	0.471395
MICALL1	MICAL3	MICAL2	2.33333	308.667	0.515431	0.679551	0	0.0567752	0.734368	0.13202	0.113208	0.0990147	0.282607	0.106112	0.197908	0.190811	0.194359	0.148461	0.15201	0.230791
SLC8A2	SLC8A1	PRKG1	7	1050.25	1.9383	0.833658	0	0.175786	0.900907	0.496466	0.416296	0.372349	0.597576	0.394322	0.506936	0.484963	0.495949	0.439643	0.450629	0.39329
ADAMTS8	ADAMTSL3	SBSPON	3	0	1.94587	0.820272	0	0.0555556	0.886441	0.498405	0.387693	0.373804	0.595414	0.380748	0.491553	0.484609	0.488081	0.432678	0.436151	0.3601
FLNC	SYNPO2	BAG3	9	1622.85	2.6159	0.777009	0	0.237988	0.839688	0.670023	0.562014	0.502517	0.712439	0.532266	0.637227	0.607478	0.622353	0.569872	0.584746	0.436925
FLNC	LDB3	BAG3	12.6667	2679.62	2.60501	0.770686	0	0.352332	0.832854	0.667232	0.588507	0.500424	0.708637	0.544465	0.648572	0.60453	0.626551	0.574498	0.596519	0.463104
FLNC	LDB3	MYOZ2	11.6667	2271.32	3.22014	0.83484	0	0.31587	0.902184	0.824789	0.697559	0.618592	0.844138	0.658076	0.770849	0.731365	0.751107	0.69472	0.714462	0.510711
MYOCD	SMTN	MYH11	10.6667	1095.69	3.01007	0.833097	0	0.245684	0.9003	0.770983	0.639658	0.578237	0.803312	0.608947	0.721485	0.690774	0.70613	0.649861	0.665216	0.479242
MYOCD	SMTN	CNN1	6.33333	595.914	2.99636	0.829314	0	0.143473	0.896213	0.767472	0.611472	0.575604	0.799657	0.593538	0.705565	0.687631	0.696598	0.640584	0.649552	0.451789
MYOCD	SMTN	TAGLN	7	752.592	2.62194	0.841017	0	0.162705	0.908859	0.67157	0.544353	0.503677	0.730892	0.524015	0.637623	0.617285	0.627454	0.57065	0.580819	0.435783
MYOCD	CNN1	MYH11	11.6667	1283.86	3.63151	0.845626	0	0.272473	0.91384	0.930154	0.765733	0.697615	0.926075	0.731674	0.845904	0.811845	0.828875	0.77176	0.788789	0.529117
MYOCD	MYH11	TAGLN	12.3333	1440.54	3.25708	0.857329	0	0.291704	0.926487	0.834251	0.698614	0.625688	0.85731	0.662151	0.777962	0.741499	0.759731	0.701825	0.720057	0.51311
MYOCD	SRF	TAGLN	8	1240.42	2.17552	0.822104	0	0.202662	0.888421	0.557225	0.468584	0.417919	0.640024	0.443251	0.554304	0.528971	0.541638	0.486111	0.498778	0.412077
LDB3	TPM1	VCL	23	5149.21	2.06529	0.779433	0	0.652224	0.842307	0.528993	0.559801	0.396745	0.607321	0.478273	0.583561	0.502033	0.542797	0.490153	0.530917	0.505881
LDB3	TPM1	ACTN1	19.3333	3636.02	2.18533	0.797163	0	0.517821	0.861468	0.559738	0.549259	0.419804	0.63517	0.484531	0.592215	0.527487	0.559851	0.506009	0.538373	0.484757
LDB3	VCL	ACTN1	23	6261.3	1.88227	0.787175	0	0.701098	0.850674	0.482115	0.53686	0.361586	0.574254	0.449223	0.555557	0.46792	0.511739	0.458572	0.50239	0.508472
LDB3	ACTN1	MYOZ2	15	3075.73	2.3436	0.809545	0	0.41295	0.874848	0.600277	0.553445	0.450208	0.66892	0.501827	0.611183	0.559564	0.585373	0.530695	0.556505	0.472019
LDB3	SMPX	MYOZ2	9.33333	1465.65	2.76328	0.804048	0	0.237252	0.868908	0.707772	0.590142	0.530829	0.748056	0.560485	0.669099	0.639443	0.654271	0.599964	0.614792	0.453483
LDB3	CASQ2	MYOZ2	10	1384.45	3.20881	0.834722	0	0.246029	0.902057	0.821887	0.677922	0.616415	0.841929	0.647169	0.759926	0.729172	0.744549	0.68817	0.703547	0.492493
LDB3	PDLIM7	PDLIM3	7.33333	1347.22	2.49219	0.864125	0	0.19501	0.933832	0.638335	0.527503	0.478751	0.712209	0.503127	0.619856	0.59548	0.607668	0.549303	0.561492	0.441794
PDE2A	GUCY1A1	GUCY1B1	7.33333	135.655	1.81523	0.912116	0	0.141764	0.985693	0.464944	0.384149	0.348708	0.595131	0.366428	0.48964	0.471919	0.48078	0.419174	0.428034	0.3981
PDE2A	ADCY5	ADCY2	14.6667	2552.38	2.30566	0.870095	2	0.383777	0.940282	0.59056	0.538864	0.609587	0.677991	0.574226	0.608428	0.643789	0.626108	0.609007	0.591327	0.645322
PDE2A	ADCY5	ADCY9	14.3333	2197.62	1.88757	0.851418	2	0.362014	0.9201	0.483472	0.453107	0.529271	0.592629	0.491189	0.522868	0.56095	0.541909	0.526069	0.507029	0.608063
PDE2A	ADCY2	ADCY9	12.3333	651.227	1.63201	0.847104	2	0.257015	0.915437	0.418014	0.377764	0.480177	0.54237	0.428971	0.460067	0.511273	0.48567	0.470122	0.444519	0.564283
GNA14	S1PR3	GNAZ	6	184.48	1.19364	0.789362	0	0.119219	0.853037	0.305732	0.259103	0.229299	0.442558	0.244201	0.350831	0.335928	0.343379	0.290065	0.297516	0.319497
GNA14	GNAO1	S1PR3	6	166.22	1.74619	0.835757	0	0.118416	0.903174	0.447261	0.365049	0.335445	0.561239	0.350247	0.463144	0.448342	0.455743	0.399295	0.406696	0.367213
GNA14	GNAO1	GNAZ	8	332.194	1.61884	0.791135	0	0.162747	0.854953	0.414642	0.351668	0.310981	0.52472	0.331325	0.438194	0.417851	0.428022	0.374588	0.384759	0.358086
GNA14	GNAZ	GNG11	7.33333	449.461	1.04916	0.771277	1	0.155555	0.833493	0.268725	0.240432	0.284877	0.409917	0.262655	0.325175	0.347397	0.336286	0.305026	0.293915	0.397777
GNA14	GNAO1	GNG11	7.33333	431.202	1.60171	0.817671	1	0.154753	0.88363	0.410254	0.346379	0.391024	0.528598	0.368701	0.437488	0.459811	0.44865	0.414256	0.403095	0.445493
TUBB6	GJA1	TUBA1A	6	1022.37	1.26005	0.860757	0	0.156042	0.930191	0.322742	0.281067	0.242057	0.474605	0.261562	0.377836	0.358331	0.368083	0.309946	0.319699	0.352244
TUBB6	MAPT	TUBA1A	7.33333	3067.48	1.56693	0.868026	0	0.270613	0.938047	0.401344	0.368661	0.301008	0.535519	0.334834	0.45209	0.418264	0.435177	0.376549	0.393462	0.402501
TPM1	MYH11	CALD1	19	1414.3	2.60125	0.835934	0	0.414008	0.903366	0.666269	0.603204	0.499702	0.725543	0.551453	0.664373	0.612622	0.638498	0.582038	0.607913	0.495911
TPM1	MYH11	VCL	25.3333	4627.79	2.12639	0.780319	0	0.672518	0.843265	0.544641	0.57661	0.408481	0.619297	0.492546	0.597954	0.513889	0.555921	0.503217	0.54525	0.515106
TPM1	MYH11	MYL9	21	1951.53	2.80997	0.828251	0	0.474655	0.895063	0.719731	0.658462	0.539798	0.763564	0.59913	0.711013	0.651681	0.681347	0.625405	0.655071	0.522362
TPM1	MYH11	ACTG2	19.3333	1537.01	3.17905	0.807742	0	0.425573	0.8729	0.814265	0.717092	0.610699	0.828924	0.663895	0.773008	0.719811	0.746409	0.691853	0.718452	0.528185
TPM1	CNN1	MYH11	17	1536.49	3.15459	0.817612	0	0.382341	0.883566	0.808	0.701585	0.606	0.826891	0.653792	0.764238	0.716446	0.740342	0.685119	0.709015	0.518477
TPM1	MYLK	MYH11	19.3333	1471.57	2.90024	0.831028	0	0.422697	0.898065	0.742851	0.662813	0.557138	0.781654	0.609975	0.722233	0.669396	0.695815	0.639686	0.666104	0.515903
TPM1	MYL6	MYH11	19.3333	1597.17	1.98346	0.752069	0	0.428217	0.812736	0.508034	0.488079	0.381025	0.584209	0.434552	0.536144	0.482617	0.509381	0.458585	0.485348	0.437247
TPM1	VCL	CALD1	23	4005.83	1.55934	0.794858	0	0.601974	0.858977	0.3994	0.450043	0.29955	0.514294	0.374797	0.482169	0.406922	0.444545	0.390859	0.428483	0.465088
TPM1	MYL9	CALD1	18.6667	1329.57	2.24292	0.84279	0	0.404111	0.910775	0.574489	0.531895	0.430867	0.658561	0.481381	0.595228	0.544714	0.569971	0.513047	0.538304	0.472344
TPM1	ACTG2	CALD1	17	915.047	2.612	0.822281	0	0.355029	0.888612	0.669023	0.590525	0.501768	0.723921	0.546146	0.657223	0.612844	0.635033	0.579495	0.601685	0.478166
TPM1	MYLK	CALD1	17	849.604	2.33319	0.845567	0	0.352153	0.913777	0.59761	0.536246	0.448207	0.676651	0.492226	0.606448	0.562429	0.584439	0.527328	0.549337	0.465885
TPM1	MYL6	CALD1	17	975.206	1.41641	0.766608	0	0.357673	0.828447	0.362792	0.361512	0.272094	0.479206	0.316803	0.420359	0.37565	0.398005	0.346227	0.368581	0.387228
TPM1	VCL	MYL9	25	4543.06	1.76806	0.787175	0	0.662622	0.850674	0.452862	0.505302	0.339646	0.552315	0.422474	0.528808	0.44598	0.487394	0.434227	0.475641	0.491539
TPM1	VCL	ACTG2	23.3333	4128.54	2.13714	0.766667	0	0.61354	0.828511	0.547396	0.563932	0.410547	0.617674	0.487239	0.590803	0.514111	0.552457	0.500675	0.539021	0.497362
TPM1	MYLK	VCL	23.3333	4063.09	1.85833	0.789953	0	0.610664	0.853676	0.475982	0.509652	0.356986	0.570405	0.433319	0.540029	0.463696	0.501862	0.448508	0.486674	0.48508
TPM1	DMD	VCL	25.3333	6364.16	1.59329	0.779965	0	0.748829	0.842882	0.408095	0.493279	0.306071	0.516792	0.399675	0.505035	0.411432	0.458233	0.405553	0.452355	0.499951
TPM1	VCL	ACTN1	25.6667	5706.13	1.20451	0.756974	0	0.726082	0.818037	0.308517	0.412908	0.231388	0.435897	0.322148	0.424403	0.333642	0.379022	0.327895	0.373275	0.463159
TPM1	MYL6	VCL	23.3333	4188.69	0.941554	0.710993	0	0.616184	0.768346	0.241164	0.334919	0.180873	0.37296	0.257896	0.35394	0.276917	0.315428	0.267406	0.305918	0.406424
TPM1	MYL9	ACTG2	19	1452.28	2.82073	0.814598	0	0.415677	0.880309	0.722485	0.645783	0.541864	0.761941	0.593824	0.703862	0.651903	0.677882	0.622863	0.648843	0.504618
TPM1	MYLK	MYL9	19	1386.84	2.54191	0.837884	0	0.412801	0.905474	0.651072	0.591504	0.488304	0.714672	0.539904	0.653088	0.601488	0.627288	0.570696	0.596496	0.492336
TPM1	MYL6	MYL9	19	1512.44	1.62514	0.758924	0	0.418321	0.820144	0.416254	0.416771	0.312191	0.517227	0.364481	0.466999	0.414709	0.440854	0.389595	0.41574	0.41368
TPM1	CNN1	ACTG2	15	1037.24	3.16535	0.80396	0	0.323362	0.868813	0.810754	0.688906	0.608066	0.825269	0.648486	0.757088	0.716667	0.736877	0.682577	0.702787	0.500732
TPM1	MYLK	ACTG2	17.3333	972.313	2.91099	0.817376	0	0.363719	0.883311	0.745606	0.650134	0.559204	0.780032	0.604669	0.715083	0.669618	0.69235	0.637144	0.659876	0.498159
TPM1	MYL6	ACTG2	17.3333	1097.91	1.99422	0.738416	0	0.369239	0.797982	0.510788	0.475401	0.383091	0.582586	0.429246	0.528994	0.482839	0.505916	0.456042	0.47912	0.419502
TPM1	MYLK	MYL6	17.3333	1032.47	1.7154	0.761702	0	0.366363	0.823146	0.439374	0.421121	0.329531	0.535317	0.375326	0.478219	0.432424	0.455322	0.403875	0.426773	0.407221
TPM1	CKB	ACTN1	15.6667	2424.59	1.34338	0.741844	0	0.39668	0.801686	0.344086	0.357234	0.258064	0.458486	0.307649	0.40786	0.358275	0.383067	0.332962	0.357754	0.385613
NFATC4	SRF	MEF2D	6.33333	1575.21	0.931209	0.798582	0	0.186512	0.863001	0.238515	0.225514	0.178886	0.394636	0.2022	0.310075	0.286761	0.298418	0.244481	0.256138	0.322007
MYLK	MYH11	CALD1	16.6667	883.359	3.07204	0.876655	0	0.347464	0.947372	0.786855	0.677007	0.590142	0.826984	0.633575	0.751996	0.708563	0.730279	0.671069	0.692785	0.520423
MYLK	MYH11	VCL	23	4096.85	2.59718	0.82104	0	0.605975	0.887271	0.665227	0.650414	0.498921	0.720738	0.574667	0.685576	0.609829	0.647703	0.592248	0.630122	0.539618
MYLK	MYH11	MYL9	18.6667	1420.59	3.28077	0.868972	0	0.408111	0.939069	0.840317	0.732266	0.630238	0.865005	0.681252	0.798635	0.747621	0.773128	0.714437	0.739944	0.546874
MYLK	MYH11	ACTG2	17	1006.07	3.64985	0.848463	0	0.35903	0.916906	0.934851	0.790896	0.701138	0.930365	0.746017	0.86063	0.815752	0.838191	0.780884	0.803324	0.552697
MYLK	MYH11	PPP1R12B	15	965.957	3.29106	0.855851	0	0.32023	0.92489	0.842953	0.712272	0.632215	0.863437	0.672244	0.787855	0.747826	0.76784	0.710035	0.730049	0.522018
MYLK	MYL6	MYH11	17	1066.23	2.45426	0.79279	0	0.361673	0.856741	0.62862	0.561883	0.471465	0.68565	0.516674	0.623767	0.578558	0.601162	0.547616	0.57022	0.461759
MYLK	VCL	CALD1	20.6667	3474.89	2.03013	0.835579	0	0.535431	0.902983	0.519986	0.523847	0.38999	0.615735	0.456918	0.569791	0.502862	0.536327	0.47989	0.513355	0.4896
MYLK	MYL9	CALD1	16.3333	798.632	2.71372	0.883511	0	0.337567	0.954781	0.695076	0.605699	0.521307	0.760002	0.563503	0.68285	0.640655	0.661752	0.602079	0.623177	0.496856
MYLK	ACTG2	CALD1	14.6667	384.106	3.08279	0.863002	0	0.288486	0.932618	0.78961	0.664329	0.592207	0.825362	0.628268	0.744845	0.708785	0.726815	0.668526	0.686557	0.502678
MYLK	MYL6	CALD1	14.6667	444.265	1.88721	0.807329	0	0.29113	0.872453	0.483379	0.435316	0.362534	0.580647	0.398925	0.507982	0.471591	0.489786	0.435258	0.453454	0.41174
MYLK	VCL	MYL9	22.6667	4012.12	2.23886	0.827896	0	0.596078	0.89468	0.573448	0.579106	0.430086	0.653756	0.504596	0.616431	0.541921	0.579176	0.523258	0.560513	0.516051
MYLK	VCL	ACTG2	21	3597.59	2.60794	0.807388	0	0.546996	0.872517	0.667982	0.637736	0.500987	0.719116	0.569361	0.678426	0.610051	0.644238	0.589706	0.623893	0.521874
MYLK	ITGA1	VCL	22.6667	5376.34	1.71837	0.814953	0	0.656033	0.880692	0.440133	0.494108	0.3301	0.550273	0.412104	0.522191	0.440186	0.481189	0.426145	0.467147	0.494215
MYLK	MYL6	VCL	21	3657.75	1.41235	0.751714	0	0.54964	0.812352	0.361751	0.408723	0.271313	0.474401	0.340018	0.441562	0.372857	0.40721	0.356438	0.39079	0.430936
MYLK	MYL9	ACTG2	16.6667	921.341	3.29152	0.855319	0	0.349133	0.924315	0.843072	0.719587	0.632304	0.863383	0.675945	0.791485	0.747843	0.769664	0.711894	0.733715	0.52913
MYLK	PPP1R12B	MYL9	14.6667	881.23	2.93273	0.862707	0	0.310333	0.932299	0.751174	0.640964	0.56338	0.796455	0.602172	0.718709	0.679918	0.699313	0.641045	0.660441	0.498451
MYLK	MYL6	MYL9	16.6667	981.499	2.09593	0.799645	0	0.351777	0.86415	0.536841	0.490575	0.40263	0.618668	0.446603	0.554621	0.510649	0.532635	0.478626	0.500612	0.438192
MYLK	MYL6	ACTG2	15	566.974	2.46501	0.779137	0	0.302695	0.841988	0.631375	0.549205	0.473531	0.684028	0.511368	0.616616	0.578779	0.597698	0.545074	0.563992	0.444014
MYLK	MYL6	PPP1R12B	13	526.863	2.10622	0.786525	0	0.263895	0.849971	0.539476	0.470581	0.404607	0.6171	0.437594	0.543841	0.510854	0.527347	0.474224	0.490717	0.413336
RYR3	CASQ2	CASQ1	5	105.789	3.15418	0.812175	0	0.0972418	0.87769	0.807894	0.630231	0.60592	0.825343	0.618075	0.727787	0.715631	0.721709	0.666853	0.672931	0.445706
RYR3	CACNA1C	NOS1	13.6667	4619.57	2.38266	0.81513	0	0.456108	0.880884	0.610282	0.571738	0.457711	0.677932	0.514725	0.624835	0.567822	0.596329	0.541273	0.56978	0.486818
SMAD9	RGMA	RGMB	4.66667	1399.43	1.87805	0.857151	0	0.147922	0.926295	0.481032	0.397755	0.360774	0.592348	0.379265	0.495051	0.476561	0.485806	0.427913	0.437158	0.388812
SMAD9	RGMA	BMPR1A	4.66667	1399.43	1.67301	0.829019	0	0.147922	0.895893	0.428517	0.358368	0.321387	0.545361	0.339878	0.451864	0.433374	0.442619	0.386626	0.395871	0.368083
SMAD9	RGMB	BMPR1A	4.66667	1399.43	1.1271	0.804314	0	0.147922	0.869196	0.28869	0.253498	0.216517	0.433816	0.235008	0.343657	0.325167	0.334412	0.280087	0.289332	0.326452
ABL1	MEF2A	MEF2D	9.66667	5298.83	0.672812	0.810816	1	0.411886	0.876221	0.17233	0.232219	0.212581	0.348303	0.2224	0.290261	0.280442	0.285352	0.251421	0.256331	0.448443
ABL1	EPHA6	EPHA7	6.33333	3748.55	1.96778	0.835225	1	0.282026	0.902599	0.504016	0.448518	0.461345	0.603662	0.454932	0.52609	0.532503	0.529297	0.493717	0.490511	0.505494
GNAL	ADCY5	ADCY2	14.6667	2678.47	2.16155	0.855437	2	0.389318	0.924443	0.553648	0.512566	0.581903	0.646347	0.547234	0.579456	0.614125	0.59679	0.580679	0.563345	0.633519
GNAL	ADCY5	EDNRA	11	2201.74	1.97354	0.871927	2	0.300466	0.942262	0.505492	0.454235	0.545786	0.614684	0.50001	0.53446	0.580235	0.557347	0.540123	0.517235	0.603722
GNAL	ADCY5	ADCY9	14.3333	2323.71	1.74346	0.836761	2	0.367555	0.90426	0.44656	0.426809	0.501586	0.560985	0.464197	0.493897	0.531286	0.512591	0.497742	0.479047	0.59626
GNAL	ADCY2	EDNRA	9	655.344	1.71798	0.867612	2	0.195468	0.9376	0.440034	0.378892	0.496692	0.564425	0.437792	0.471659	0.530559	0.501109	0.484175	0.454725	0.559942
GNAL	ADCY2	ADCY9	12.3333	777.314	1.4879	0.832447	2	0.262557	0.899598	0.381102	0.351465	0.452493	0.510726	0.401979	0.431095	0.481609	0.456352	0.441794	0.416537	0.552481
GNAL	ADCY9	EDNRA	8.66667	300.59	1.29989	0.848936	2	0.173704	0.917417	0.332946	0.293135	0.416376	0.479063	0.354756	0.386099	0.44772	0.416909	0.401238	0.370427	0.522683
GRIK3	GRIN2A	GRIK5	4.66667	868.126	2.54882	0.858629	0	0.124572	0.927892	0.652841	0.520774	0.489631	0.721604	0.505202	0.621189	0.605617	0.613403	0.55541	0.563195	0.426326
PKD2	PKD1	TRPC1	5.33333	454.393	1.51338	0.891608	0	0.118735	0.963531	0.387628	0.320405	0.290721	0.531604	0.305563	0.426005	0.411163	0.418584	0.358363	0.365784	0.367474
PKD2	TRPC1	TRPC4	5.66667	448.452	1.74233	0.865957	0	0.124647	0.935811	0.446271	0.365865	0.334703	0.568656	0.350284	0.46726	0.451679	0.45947	0.400982	0.408772	0.376682
ITGA7	ITGB3	COL6A2	14.3333	2845.75	1.64977	0.864716	0	0.390498	0.93447	0.422562	0.414546	0.316922	0.550539	0.365734	0.482543	0.433731	0.458137	0.399732	0.424138	0.436883
ITGA7	ITGB3	ACTN1	19.6667	4459.34	1.56295	0.822695	0	0.560177	0.889059	0.400326	0.440289	0.300244	0.522509	0.370266	0.481399	0.411377	0.446388	0.390821	0.425833	0.462391
ITGA7	LAMB2	ITGB3	15.3333	2933.63	1.41728	0.816903	1	0.412878	0.8828	0.363015	0.375481	0.355595	0.492961	0.365538	0.434221	0.424278	0.42925	0.394908	0.39988	0.498007
ITGA7	ITGB3	TNC	13.6667	2691.05	1.87546	0.839243	0	0.371353	0.906943	0.48037	0.453116	0.360277	0.587013	0.406697	0.520064	0.473645	0.496855	0.440171	0.46338	0.439666
ITGA7	ITGB3	COL4A5	14.3333	2691.86	1.71375	0.800473	1	0.383734	0.865044	0.43895	0.425146	0.412546	0.545474	0.418846	0.48531	0.47901	0.48216	0.448928	0.452078	0.505266
SMTN	MYH11	CALD1	13.3333	760.105	2.70496	0.850709	0	0.280319	0.919333	0.692833	0.589704	0.519625	0.749458	0.554665	0.669581	0.634541	0.652061	0.594603	0.612123	0.473121
SMTN	CNN1	MYH11	11.3333	882.294	3.2583	0.832388	0	0.248652	0.899534	0.834564	0.688086	0.625923	0.850806	0.657004	0.769446	0.738365	0.753905	0.697685	0.713225	0.495687
SMTN	MYH11	TAGLN	12	1038.97	2.88388	0.84409	0	0.267883	0.91218	0.738661	0.620967	0.553996	0.782041	0.587481	0.701504	0.668019	0.684761	0.62775	0.644493	0.479681
SMTN	TAGLN	CALD1	9.66667	417.011	2.31683	0.858629	0	0.197339	0.927892	0.59342	0.4944	0.445065	0.677038	0.469732	0.585719	0.561052	0.573385	0.515392	0.527726	0.429663
RGMA	GDF5	RGMB	5	674.369	1.80911	0.816785	0	0.12223	0.882672	0.463374	0.378088	0.347531	0.568199	0.362809	0.473144	0.457865	0.465504	0.410337	0.417977	0.367069
RGMA	GDF5	BMPR1A	5	674.369	1.60407	0.788652	0	0.12223	0.852271	0.410858	0.338701	0.308144	0.521212	0.323423	0.429956	0.414678	0.422317	0.36905	0.37669	0.34634
RGMA	RGMB	CHRDL1	4.33333	379.373	2.45136	0.877423	0	0.0969197	0.948202	0.627878	0.495138	0.470908	0.707959	0.483023	0.601548	0.589433	0.595491	0.536228	0.542286	0.41825
RGMA	RGMB	BMPR1A	5	569.06	1.56572	0.818558	0	0.117602	0.884588	0.401035	0.330176	0.300776	0.521923	0.315476	0.42605	0.411349	0.4187	0.363413	0.370763	0.350806
RGMA	CHRDL1	BMPR1A	4.33333	379.373	2.24633	0.849291	0	0.0969197	0.9178	0.575362	0.455751	0.431521	0.660971	0.443636	0.558361	0.546246	0.552304	0.494941	0.500999	0.39752
GAB1	HGF	KIT	9.33333	1284.23	1.21716	0.819681	2	0.229279	0.885802	0.311756	0.291136	0.400483	0.455267	0.34581	0.373202	0.427875	0.400539	0.386843	0.359506	0.523376
GAB1	RAP1A	GDNF	8	1182.05	0.480905	0.711525	0	0.200097	0.768921	0.123176	0.142407	0.0923823	0.284613	0.117394	0.21351	0.188497	0.201004	0.152946	0.165452	0.273049
GAB1	RAP1A	HGF	8.33333	1276.43	0.913791	0.757742	1	0.210418	0.818867	0.234053	0.228144	0.258873	0.380257	0.243509	0.304201	0.319565	0.311883	0.281537	0.273855	0.399168
GDF5	RGMB	BMPR1A	5	674.369	1.05816	0.763948	0	0.12223	0.825573	0.271032	0.233831	0.203274	0.409667	0.218552	0.321749	0.30647	0.31411	0.262511	0.270151	0.304709
HSPB2	BAG3	CRYAB	6.66667	730.723	1.48227	0.774764	0	0.155571	0.837261	0.379661	0.323639	0.284746	0.494061	0.304192	0.40885	0.389404	0.399127	0.346798	0.356521	0.343123
HSPB2	PRNP	CRYAB	7	2303.07	1.69594	0.843499	0	0.230845	0.911541	0.43439	0.383504	0.325792	0.553678	0.354648	0.468591	0.439735	0.454163	0.397191	0.411619	0.394194
CACNA2D1	HSPA2	CACNA1C	12.6667	4133.1	1.6859	0.833688	0	0.41621	0.900939	0.431817	0.427916	0.323863	0.549098	0.375889	0.488507	0.43648	0.462494	0.406185	0.432198	0.437242
CACNA2D1	HSPA2	CACNA1H	7.66667	696.469	1.69979	0.815366	0	0.172584	0.881139	0.435376	0.369678	0.326532	0.546817	0.348105	0.458247	0.436674	0.447461	0.392389	0.403176	0.372275
CACNA2D1	CACNA1C	CACNA1H	12.6667	3727.7	1.99116	0.847459	0	0.398393	0.91582	0.510005	0.482102	0.382504	0.611459	0.432303	0.54678	0.496981	0.521881	0.464642	0.489542	0.456055
EVC	EVC2	GLI3	3.33333	922.333	1.71737	0.913534	1	0.102263	0.987226	0.439879	0.355475	0.413242	0.576716	0.384359	0.466095	0.494979	0.480537	0.439669	0.425227	0.465675
GRIN2A	NEFL	DLG2	10.3333	3925.76	1.95371	0.854137	0	0.363888	0.923038	0.500413	0.466282	0.37531	0.606069	0.420796	0.536176	0.49069	0.513433	0.455743	0.478486	0.446835
GRIN2A	DLG2	NLGN2	9.66667	4142.47	1.8255	0.874468	0	0.361066	0.945009	0.467574	0.440947	0.35068	0.586932	0.395814	0.51394	0.468806	0.491373	0.43231	0.454877	0.443412
PDE1A	NPR2	PDE5A	7.33333	218.771	1.43701	0.880496	0	0.145417	0.951523	0.368066	0.312404	0.27605	0.513931	0.294227	0.413167	0.39499	0.404079	0.344609	0.353697	0.366252
PDE1A	PDE1C	NPR2	7.33333	224.963	1.50271	0.862116	0	0.145689	0.93166	0.384896	0.325094	0.288672	0.521587	0.306883	0.423341	0.40513	0.414235	0.356006	0.365112	0.365561
PDE1A	GUCY1A1	PDE5A	8.33333	268.543	1.70333	0.891844	0	0.166123	0.963786	0.436282	0.368742	0.327211	0.568158	0.347977	0.46845	0.447685	0.458067	0.397831	0.408213	0.391548
PDE1A	GUCY1A1	GUCY1B1	8.33333	213.831	1.78103	0.925355	0	0.163718	1	0.456184	0.383068	0.342138	0.592138	0.362603	0.487603	0.467138	0.477371	0.414871	0.425103	0.404976
PDE1A	GUCY1A1	PDE1C	8.33333	274.734	1.76904	0.873463	0	0.166395	0.943923	0.453111	0.381432	0.339834	0.575814	0.360633	0.478623	0.457824	0.468224	0.409228	0.419628	0.390857
PDE1A	ADCY5	PDE5A	13	2250.1	2.01502	0.873641	1	0.339629	0.944114	0.516115	0.471993	0.47042	0.623115	0.471207	0.547554	0.546767	0.547161	0.508987	0.50938	0.533298
PDE1A	GUCY1B1	PDE5A	8.33333	268.543	1.58071	0.893144	0	0.166123	0.965191	0.404874	0.345186	0.303655	0.544953	0.324421	0.445069	0.424304	0.434687	0.374362	0.384745	0.384047
PDE1A	ADCY2	PDE5A	11	703.706	1.75945	0.869326	1	0.23463	0.939452	0.450657	0.39665	0.421326	0.572856	0.408988	0.484753	0.497091	0.490922	0.45304	0.446871	0.489518
PDE1A	ADCY9	PDE5A	10.6667	348.951	1.34136	0.85065	1	0.212867	0.919269	0.343569	0.310893	0.34101	0.487494	0.325952	0.399194	0.414252	0.406723	0.370102	0.362573	0.45226
PDE1A	ADCY5	ADCY2	15.6667	2630.55	2.27147	0.883333	2	0.405731	0.954589	0.581801	0.537783	0.603017	0.674998	0.5704	0.606391	0.639008	0.622699	0.604704	0.588396	0.652197
PDE1A	ADCY5	PDE1C	13	2256.3	2.08072	0.85526	1	0.339901	0.924251	0.532945	0.484684	0.483042	0.630771	0.483863	0.557727	0.556906	0.557317	0.520385	0.520795	0.532607
PDE1A	ADCY5	ADCY9	15.3333	2275.8	1.85337	0.864657	2	0.383968	0.934406	0.474713	0.452026	0.522701	0.589636	0.487364	0.520831	0.556169	0.5385	0.521766	0.504098	0.614938
PDE1A	GUCY1B1	PDE1C	8.33333	274.734	1.64641	0.874764	0	0.166395	0.945328	0.421703	0.357876	0.316277	0.552609	0.337077	0.455243	0.434443	0.444843	0.38576	0.39616	0.383357
PDE1A	ADCY2	PDE1C	11	709.897	1.82516	0.850946	1	0.234902	0.919589	0.467486	0.40934	0.433948	0.580512	0.421644	0.494926	0.50723	0.501078	0.464437	0.458285	0.488828
PDE1A	ADCY2	ADCY9	13.3333	729.402	1.59781	0.860343	2	0.278969	0.929744	0.409255	0.376683	0.473608	0.539377	0.425145	0.45803	0.506492	0.482261	0.465819	0.441588	0.571159
PDE1A	ADCY9	PDE1C	10.6667	355.143	1.40707	0.83227	1	0.213139	0.899406	0.360398	0.323583	0.353632	0.49515	0.338608	0.409367	0.424391	0.416879	0.381499	0.373987	0.451569
PDE1A	PDE1C	NCALD	6.33333	224.415	1.51556	0.844444	0	0.127147	0.912563	0.388188	0.322928	0.291141	0.519282	0.307034	0.421105	0.405211	0.413158	0.356123	0.36407	0.356974
ADCY5	GNAO1	CNR1	11.6667	2348.43	2.76743	0.873345	1	0.319259	0.943795	0.708833	0.61144	0.614958	0.767574	0.613199	0.689507	0.691266	0.690386	0.652232	0.651353	0.576305
ADCY5	CAV1	CNR1	17	7816.03	2.14728	0.850768	1	0.658314	0.919397	0.549993	0.577073	0.495828	0.642344	0.53645	0.609708	0.569086	0.589397	0.552768	0.573079	0.615259
ADCY5	GNAO1	GNAZ	13.3333	2345.57	2.31314	0.842376	1	0.349997	0.910328	0.592474	0.531854	0.527689	0.671937	0.529771	0.601896	0.599813	0.600854	0.564792	0.565834	0.546533
ADCY5	ADCY2	GNAZ	15.6667	2683.34	2.06493	0.828073	2	0.408051	0.894871	0.528899	0.498687	0.563341	0.620392	0.531014	0.55954	0.591866	0.575703	0.56144	0.545277	0.624622
ADCY5	ADCY9	GNAZ	15.3333	2328.58	1.64683	0.809397	2	0.386287	0.874689	0.421811	0.41293	0.483025	0.53503	0.447977	0.47398	0.509028	0.491504	0.478502	0.460979	0.587363
ADCY5	ADCY2	PDE5A	15.3333	2622.39	2.11283	0.850473	2	0.3992	0.919078	0.541168	0.505676	0.572542	0.635645	0.539109	0.57066	0.604094	0.587377	0.571601	0.554885	0.631528
ADCY5	ADCY9	PDE5A	15	2267.64	1.69473	0.831797	2	0.377436	0.898895	0.434079	0.419919	0.492226	0.550283	0.456072	0.485101	0.521255	0.503178	0.488664	0.470587	0.594269
ADCY5	ADCY2	GNAO1	15.6667	2665.08	2.61748	0.874468	2	0.407249	0.945009	0.670428	0.604633	0.669488	0.739073	0.63706	0.671853	0.70428	0.688067	0.67067	0.654457	0.672338
ADCY5	GNAO1	ADCY9	15.3333	2310.32	2.19939	0.855792	2	0.385485	0.924826	0.56334	0.518876	0.589172	0.653711	0.554024	0.586294	0.621441	0.603868	0.587733	0.570159	0.635079
ADCY5	ADCY2	PDE1C	15.3333	2628.58	2.17853	0.832092	2	0.399472	0.899214	0.557997	0.518366	0.585165	0.643301	0.551765	0.580834	0.614233	0.597533	0.582999	0.566299	0.630838
ADCY5	ADCY2	ADCY9	17.6667	2648.09	1.95118	0.841489	3	0.443539	0.90937	0.499765	0.485709	0.624824	0.602166	0.555266	0.543938	0.613495	0.578716	0.584381	0.549602	0.713168
ADCY5	ADCY2	PDE3A	14.6667	2552.38	2.33669	0.869208	2	0.383777	0.939324	0.598506	0.544824	0.615546	0.68371	0.580185	0.614267	0.649628	0.631948	0.614906	0.597226	0.647068
ADCY5	ADCY2	EDNRA	14.3333	2526.12	2.18127	0.876655	3	0.37645	0.947372	0.558697	0.513136	0.669023	0.655866	0.591079	0.584501	0.662444	0.623473	0.626762	0.58779	0.72063
ADCY5	ADCY2	PDE8B	13.6667	2517.36	2.08069	0.841608	2	0.36372	0.909497	0.532937	0.490632	0.566369	0.627077	0.528501	0.558855	0.596723	0.577789	0.562612	0.543678	0.618205
ADCY5	ADCY9	PDE1C	15	2273.83	1.76044	0.813416	2	0.377708	0.879032	0.450909	0.432609	0.504848	0.55794	0.468729	0.495274	0.531394	0.513334	0.500061	0.482001	0.593579
ADCY5	ADCY9	PDE3A	14.3333	2197.62	1.91859	0.850532	2	0.362014	0.919142	0.491418	0.459067	0.53523	0.598349	0.497148	0.528708	0.566789	0.547748	0.531969	0.512928	0.60981
ADCY5	ADCY9	EDNRA	14	2171.36	1.76317	0.857979	3	0.354687	0.927189	0.451609	0.427379	0.588707	0.570504	0.508043	0.498941	0.579606	0.539273	0.543824	0.503492	0.683371
ADCY5	PDE8B	ADCY9	13.3333	2162.61	1.6626	0.822931	2	0.341956	0.889315	0.425848	0.404875	0.486053	0.541715	0.445464	0.473295	0.513884	0.49359	0.479674	0.45938	0.580946
ADCY5	CAV1	CACNA1C	23.6667	11204.6	2.02299	0.855792	1	0.930694	0.924826	0.518157	0.621291	0.471951	0.619824	0.546621	0.620557	0.545887	0.583222	0.546254	0.583589	0.676752
PGR	KLF9	MAPK10	5.33333	2435.59	2.09019	0.881265	1	0.205805	0.952354	0.535371	0.452979	0.484861	0.639616	0.46892	0.546298	0.562239	0.554268	0.51558	0.507609	0.506716
DMD	DTNA	SGCA	10.6667	2435.18	2.40193	0.858452	0	0.304552	0.9277	0.615217	0.537551	0.461413	0.693338	0.499482	0.615445	0.577375	0.59641	0.538429	0.557463	0.461867
DMD	SGCA	SGCD	10.6667	2480.8	2.37909	0.861998	0	0.306557	0.931532	0.609368	0.533665	0.457026	0.689909	0.495346	0.611787	0.573467	0.592627	0.534407	0.553566	0.461864
DMD	PGM5	SGCA	10.3333	2706.05	2.80016	0.863652	0	0.310284	0.933321	0.717216	0.615483	0.537912	0.771242	0.576698	0.693363	0.654577	0.67397	0.615637	0.63503	0.490205
DMD	SYNM	VCL	20	6011.51	2.32042	0.803546	0	0.634565	0.868366	0.594339	0.604395	0.445754	0.662846	0.525075	0.63362	0.5543	0.59396	0.539687	0.579348	0.524317
DMD	ITGA1	VCL	24.6667	7677.41	1.45333	0.804965	0	0.794198	0.869898	0.372247	0.477734	0.279185	0.49666	0.37846	0.487197	0.387922	0.43756	0.383191	0.432828	0.509086
DMD	DTNA	SGCD	11	2488.08	2.2269	0.869149	0	0.31305	0.93926	0.570387	0.506052	0.42779	0.662605	0.466921	0.584329	0.545197	0.564763	0.506059	0.525625	0.455674
DMD	DTNA	SYNM	11	2738.02	2.80017	0.851359	0	0.324034	0.920036	0.717221	0.618924	0.537916	0.767925	0.57842	0.693424	0.65292	0.673172	0.61567	0.635922	0.490323
DMD	DTNA	SYNC	10.3333	2520.87	2.44154	0.878428	0	0.302145	0.949288	0.625362	0.544558	0.469022	0.706343	0.50679	0.625451	0.587682	0.606567	0.547236	0.56612	0.469199
DMD	PGM5	SGCD	10.6667	2758.95	2.62513	0.87435	0	0.318782	0.944881	0.672385	0.583985	0.504289	0.740509	0.544137	0.662247	0.622399	0.642323	0.583268	0.603192	0.484012
DMD	ITGA1	CAV1	22	10011.2	1.52549	0.838889	0	0.84738	0.906559	0.39073	0.504892	0.293047	0.519687	0.39897	0.51229	0.406367	0.459328	0.402668	0.45563	0.536167
DMD	SYNM	SYNC	10.3333	2816.43	2.99197	0.864184	0	0.315135	0.933895	0.766347	0.653544	0.57476	0.808234	0.614152	0.730889	0.691497	0.711193	0.652825	0.672521	0.503844
DMD	ITGA1	LAMB2	16.6667	4638.5	1.42769	0.816903	1	0.512495	0.8828	0.365682	0.402385	0.357595	0.494961	0.37999	0.448673	0.426278	0.437475	0.403134	0.414331	0.523578
MYL6	MYH11	CALD1	16.6667	1008.96	2.15527	0.797695	0	0.352984	0.862043	0.552038	0.502274	0.414028	0.629539	0.458151	0.565907	0.521784	0.543845	0.489968	0.512029	0.441766
MYL6	MYH11	VCL	23	4222.45	1.68041	0.74208	0	0.611495	0.801942	0.43041	0.475681	0.322808	0.523293	0.399244	0.499487	0.42305	0.461269	0.411147	0.449366	0.460962
MYL6	MYH11	MYL9	18.6667	1546.19	2.36399	0.790012	0	0.413631	0.85374	0.6055	0.557533	0.454125	0.66756	0.505829	0.612546	0.560842	0.586694	0.533335	0.559187	0.468218
MYL6	MYH11	ACTG2	17	1131.67	2.73307	0.769504	0	0.36455	0.831577	0.700034	0.616163	0.525025	0.73292	0.570594	0.674541	0.628972	0.651757	0.599783	0.622568	0.47404
MYL6	RHOB	MYH11	14.6667	1677.82	1.8113	0.752837	0	0.345342	0.813566	0.463937	0.434288	0.347953	0.551344	0.39112	0.492816	0.449648	0.471232	0.420384	0.441968	0.405711
MYL6	MYH11	PPP1R12B	15	1091.56	2.37428	0.776891	0	0.32575	0.839561	0.608136	0.537539	0.456102	0.665992	0.49682	0.601766	0.561047	0.581406	0.528934	0.549293	0.443361
MYL6	VCL	CALD1	20.6667	3600.49	1.11336	0.756619	0	0.540951	0.817653	0.285169	0.349114	0.213877	0.41829	0.281495	0.383702	0.316083	0.349893	0.298789	0.332599	0.410943
MYL6	MYL9	CALD1	16.3333	924.233	1.79694	0.804551	0	0.343087	0.869451	0.460258	0.430966	0.345194	0.562557	0.38808	0.496761	0.453875	0.475318	0.420978	0.44242	0.418199
MYL6	ACTG2	CALD1	14.6667	509.708	2.16602	0.784043	0	0.294006	0.847289	0.554792	0.489596	0.416094	0.627917	0.452845	0.558756	0.522005	0.540381	0.487425	0.505801	0.424022
MYL6	VCL	MYL9	22.6667	4137.72	1.32208	0.748936	0	0.601598	0.80935	0.338631	0.404372	0.253973	0.456311	0.329173	0.430341	0.355142	0.392742	0.342157	0.379757	0.437395
MYL6	VCL	ACTG2	21	3723.2	1.69116	0.728428	0	0.552516	0.787188	0.433165	0.463003	0.324873	0.52167	0.393938	0.492336	0.423272	0.457804	0.408605	0.443137	0.443217
MYL6	MYL9	ACTG2	16.6667	1046.94	2.37475	0.776359	0	0.354653	0.838986	0.608254	0.544854	0.456191	0.665937	0.500522	0.605396	0.561064	0.58323	0.530793	0.552959	0.450473
MYL6	RHOB	MYL9	14.3333	1593.09	1.45298	0.759693	0	0.335446	0.820975	0.372157	0.362979	0.279118	0.484362	0.321049	0.423671	0.38174	0.402705	0.351394	0.37236	0.382144
MYL6	PPP1R12B	MYL9	14.6667	1006.83	2.01596	0.783747	0	0.315853	0.846969	0.516356	0.466231	0.387267	0.59901	0.426749	0.53262	0.493138	0.512879	0.459944	0.479684	0.419795
MYL6	RHOB	PPP1R12B	10.6667	1138.46	1.46327	0.746572	0	0.247564	0.806796	0.374793	0.342986	0.281095	0.482794	0.312041	0.41289	0.381945	0.397417	0.346993	0.362465	0.357288
ADCY2	GNAO1	GNAZ	11.3333	799.171	2.05757	0.838061	1	0.244999	0.905665	0.527015	0.456511	0.478595	0.621678	0.467553	0.539095	0.550136	0.544616	0.508845	0.503324	0.502753
ADCY2	ADCY9	GNAZ	13.3333	782.184	1.39127	0.805083	2	0.281289	0.870026	0.356353	0.337587	0.433931	0.484771	0.385759	0.411179	0.459351	0.435265	0.422555	0.398469	0.543584
ADCY2	ADCY9	PDE5A	13	721.24	1.43917	0.827482	2	0.272438	0.894233	0.368621	0.344576	0.443133	0.500024	0.393854	0.4223	0.471578	0.446939	0.432716	0.408077	0.55049
ADCY2	GNAO1	ADCY9	13.3333	763.924	1.94383	0.851478	2	0.280487	0.920164	0.497882	0.443533	0.540078	0.603452	0.491805	0.523493	0.571765	0.547629	0.531785	0.507649	0.5913
ADCY2	ADCY9	PDE1C	13	727.432	1.50488	0.809102	2	0.27271	0.874369	0.385451	0.357266	0.455755	0.507681	0.40651	0.432473	0.481718	0.457095	0.444114	0.419492	0.549799
ADCY2	ADCY9	PDE3A	12.3333	651.227	1.66303	0.846217	2	0.257015	0.914479	0.425959	0.383723	0.486136	0.548089	0.43493	0.465906	0.517113	0.49151	0.476021	0.450418	0.56603
ADCY2	ADCY9	EDNRA	12	624.967	1.50761	0.853664	3	0.249688	0.922527	0.386151	0.352035	0.539613	0.520245	0.445824	0.43614	0.529929	0.483035	0.487877	0.440982	0.639592
ADCY2	PDE8B	ADCY9	11.3333	616.209	1.40704	0.818617	2	0.236958	0.884652	0.36039	0.329532	0.436959	0.491456	0.383246	0.410494	0.464208	0.437351	0.423727	0.39687	0.537167
TRPC1	CAV1	KCNMA1	13	5864.7	2.01166	0.87961	0	0.498483	0.950565	0.515254	0.511062	0.386441	0.624082	0.448751	0.567572	0.505261	0.536417	0.477006	0.508161	0.491076
TRPC1	CAV1	TRPC4	11.6667	5678.88	1.59459	0.835993	0	0.465626	0.90343	0.408428	0.422728	0.306321	0.532179	0.364524	0.477453	0.41925	0.448352	0.391887	0.420989	0.444371
TRPC1	CACNA1H	KCNMA1	7.66667	370.2	2.42313	0.873463	0	0.158245	0.943923	0.620648	0.505047	0.465486	0.701467	0.485267	0.603257	0.583476	0.593367	0.534371	0.544262	0.430704
TRPC1	TRPC4	CACNA1H	6.33333	184.387	2.00606	0.829846	0	0.125387	0.896787	0.513822	0.416713	0.385366	0.609563	0.40104	0.513138	0.497465	0.505302	0.449252	0.457089	0.383999
GRIP1	MEF2A	MEF2D	7	2203.9	0.487509	0.741312	0	0.226487	0.801111	0.124868	0.150272	0.0936508	0.293929	0.121962	0.222101	0.19379	0.207945	0.157876	0.172031	0.288116
ITGA1	COL4A6	ITGB3	17.3333	5007.09	1.65074	0.790189	1	0.54104	0.853931	0.422812	0.452369	0.400442	0.530592	0.426406	0.49148	0.465517	0.478499	0.445961	0.458943	0.537779
ITGA1	COL4A6	COL4A5	10.6667	2433.03	1.77694	0.756265	2	0.304458	0.81727	0.455137	0.417467	0.508019	0.54567	0.462743	0.481569	0.526845	0.504207	0.494794	0.472156	0.560883
ITGA1	ITGB3	JAM2	17	4544.43	1.56057	0.856856	0	0.514534	0.925976	0.399715	0.428419	0.299786	0.53128	0.364103	0.47985	0.415533	0.447691	0.389818	0.421976	0.460056
ITGA1	JAM3	JAM2	10.6667	3188.16	1.78777	0.897695	0	0.337645	0.970109	0.457909	0.427843	0.343432	0.585959	0.385638	0.506901	0.464696	0.485798	0.425167	0.446269	0.441416
ITGA1	ITGB3	VCL	26.3333	7825.96	1.08915	0.793676	0	0.83159	0.857699	0.278968	0.417124	0.209226	0.423651	0.313175	0.420387	0.316438	0.368413	0.314807	0.366781	0.492064
ITGA1	TNS1	VCL	21	5301.93	1.57496	0.821513	0	0.621899	0.887782	0.403401	0.458025	0.30255	0.524496	0.380288	0.491261	0.413523	0.452392	0.396906	0.435774	0.47827
ITGA1	VCL	ACTN1	25	7019.37	1.06455	0.781974	0	0.771451	0.845053	0.272668	0.397364	0.204501	0.415765	0.300933	0.406564	0.310133	0.358349	0.305533	0.353749	0.472293
ITGA1	VCL	SORBS1	20	7148.51	1.61936	0.800946	0	0.684534	0.865555	0.414774	0.482214	0.311081	0.52747	0.396647	0.504842	0.419275	0.462058	0.407961	0.450745	0.491216
ITGA1	ITGB3	JAM3	17.6667	5763.09	1.46098	0.863948	0	0.580437	0.93364	0.374207	0.425765	0.280656	0.514066	0.35321	0.469915	0.397361	0.433638	0.375285	0.411563	0.472071
ITGA1	ITGB3	CAV1	23.6667	10159.7	1.16131	0.8276	0	0.884773	0.89436	0.297451	0.444281	0.223088	0.446678	0.333685	0.44548	0.334883	0.390181	0.334284	0.389582	0.519146
ITGA1	TNS1	ITGB3	18.6667	4595.32	1.71959	0.850946	0	0.547635	0.919589	0.440445	0.467243	0.330334	0.560231	0.398788	0.513737	0.445283	0.47951	0.422035	0.456263	0.476917
ITGA1	ITGB3	COL6A2	17.3333	4699.18	1.296	0.853428	0	0.527508	0.922271	0.33195	0.380839	0.248962	0.47953	0.314901	0.430185	0.364246	0.397216	0.339574	0.372543	0.445432
ITGA1	ITGB3	ACTN1	22.6667	6312.77	1.20918	0.811407	0	0.697187	0.87686	0.309713	0.406582	0.232285	0.4515	0.319433	0.429041	0.341892	0.385467	0.330663	0.374237	0.47094
ITGA1	LAMB2	ITGB3	18.3333	4787.05	1.06351	0.805615	1	0.549888	0.870601	0.272403	0.341774	0.287635	0.421952	0.314705	0.381863	0.354794	0.368329	0.334749	0.348284	0.506556
ITGA1	ITGB3	COL4A5	17.3333	4545.29	1.35998	0.789184	1	0.520744	0.852845	0.348337	0.391439	0.344586	0.474464	0.368013	0.432952	0.409525	0.421239	0.388769	0.400482	0.513815
ITGA1	TNS1	ACTN1	17.3333	3788.74	1.69499	0.839243	0	0.487495	0.906943	0.434146	0.447483	0.325609	0.552345	0.386546	0.499914	0.438977	0.469446	0.412762	0.44323	0.457146
GUCY1A1	GUCY1B1	PDE3A	7.33333	135.655	1.84625	0.911229	0	0.141764	0.984735	0.472889	0.390108	0.354667	0.600851	0.372387	0.495479	0.477759	0.486619	0.425073	0.433933	0.399847
GUCY1A1	PRKG1	PDE5A	10.3333	1167.48	1.66264	0.875	0	0.242666	0.945583	0.42586	0.380062	0.319395	0.555791	0.349728	0.467926	0.437593	0.45276	0.393661	0.408827	0.403527
GUCY1A1	GUCY1B1	PDE5A	8	205.669	1.62239	0.892494	0	0.157187	0.964489	0.415551	0.35096	0.311663	0.552785	0.331312	0.451873	0.432224	0.442049	0.381768	0.391592	0.384307
GUCY1A1	GUCY1B1	PRKG1	10.3333	1112.77	1.74035	0.908511	0	0.240262	0.981797	0.445762	0.394387	0.334322	0.579771	0.364355	0.487079	0.457046	0.472063	0.410701	0.425717	0.416955
GUCY1A1	GUCY1B1	PDE1C	8	211.86	1.6881	0.874113	0	0.157459	0.944625	0.432381	0.36365	0.324285	0.560442	0.343968	0.462046	0.442364	0.452205	0.393166	0.403007	0.383616
GUCY1A1	GUCY1B1	NOS1	9.33333	1134.04	1.99905	0.886111	0	0.222678	0.957591	0.512024	0.439688	0.384018	0.623416	0.411853	0.531552	0.503717	0.517635	0.457785	0.471703	0.423073
RSPO3	RSPO2	RSPO1	2	0	2.60784	0.867553	0	0.037037	0.937536	0.667958	0.510228	0.500968	0.735352	0.505598	0.62279	0.61816	0.620475	0.561879	0.564194	0.410633
MAP1B	MAPT	MAP2	7.33333	4369.54	1.53147	0.822281	0	0.327835	0.888612	0.392263	0.376156	0.294197	0.51635	0.335177	0.446253	0.405274	0.425764	0.370225	0.390715	0.402178
FGF10	HGF	KIT	8.66667	1204.31	1.96815	0.865485	3	0.213421	0.935301	0.504111	0.431438	0.628083	0.611908	0.529761	0.521673	0.619996	0.570835	0.574878	0.525717	0.663208
FGF10	FGFR1	HGF	8.66667	1289.53	2.03429	0.885816	3	0.217166	0.957272	0.521052	0.44508	0.640789	0.630107	0.542934	0.537593	0.635448	0.586521	0.589191	0.540264	0.673872
GUCY1B1	PRKG1	PDE5A	10.3333	1167.48	1.54002	0.8763	0	0.242666	0.946989	0.394452	0.356505	0.295839	0.532586	0.326172	0.444546	0.414212	0.429379	0.370192	0.385359	0.396027
PGM5	SGCA	SGCD	5.33333	333.337	2.74827	0.874291	0	0.113415	0.944817	0.703925	0.556298	0.527944	0.764148	0.542121	0.660223	0.646046	0.653135	0.594084	0.601172	0.440539
DTNA	SYNM	SYNC	5.33333	398.092	2.96292	0.871277	0	0.116261	0.94156	0.758906	0.598244	0.569179	0.804569	0.583712	0.701407	0.686874	0.694141	0.635293	0.642559	0.454182
DTNA	SGCA	SGCD	5.66667	62.463	2.35004	0.86909	0	0.107683	0.939197	0.601926	0.478366	0.451445	0.686244	0.464905	0.582305	0.568844	0.575575	0.516875	0.523605	0.412202
NEFL	MAPT	MAP2	8.33333	3704.65	1.42739	0.808333	0	0.317133	0.873539	0.365603	0.353486	0.274202	0.492587	0.313844	0.423036	0.383395	0.403215	0.348619	0.36844	0.389069
NRXN3	DLG2	NLGN3	7.66667	3270.37	2.21586	0.867553	0	0.285702	0.937536	0.567559	0.497094	0.425669	0.660053	0.461382	0.578574	0.542861	0.560717	0.502121	0.519978	0.447699
NRXN3	DLG2	NLGN2	8.33333	4146.92	2.13483	0.880615	0	0.33657	0.951651	0.546804	0.494245	0.410103	0.648016	0.452174	0.57113	0.529059	0.550095	0.490617	0.511652	0.458756
DLG2	NLGN3	NRXN1	7.66667	2594.98	2.30059	0.876123	0	0.25602	0.946797	0.58926	0.50595	0.441945	0.678644	0.473947	0.592297	0.560294	0.576296	0.517121	0.533122	0.448019
DLG2	NLGN2	NRXN1	8.33333	3471.53	2.21956	0.889184	0	0.306888	0.960912	0.568505	0.503101	0.426379	0.666607	0.46474	0.584854	0.546493	0.565673	0.505616	0.524797	0.459076
PRKG1	CACNA1C	KCNMA1	15.6667	4771.45	2.36475	0.876891	0	0.49982	0.947627	0.605694	0.579226	0.454271	0.691177	0.516748	0.635201	0.572724	0.603963	0.544736	0.575975	0.513285
PRKG1	KCNMB1	KCNMA1	8.66667	1214.01	2.57558	0.861998	0	0.213847	0.931532	0.659695	0.548233	0.494771	0.727654	0.521502	0.637944	0.611213	0.624578	0.566357	0.579723	0.451269
PRKG1	CACNA1C	KCNMB1	14	4569.57	2.23734	0.855083	0	0.460083	0.92406	0.57306	0.544816	0.429795	0.66081	0.487306	0.602813	0.545303	0.574058	0.516304	0.545059	0.489301
CBX7	EZH1	CBX6	3.33333	0.333333	1.1944	0.828723	0	0.061743	0.895574	0.305928	0.244882	0.229446	0.453339	0.237164	0.349111	0.341393	0.345252	0.289278	0.293137	0.315811
ROM1	AHNAK	PYGM	3.66667	994.657	1.50213	0.77695	0	0.111615	0.839624	0.384747	0.316464	0.288561	0.498467	0.302512	0.407465	0.393514	0.40049	0.348013	0.354989	0.333997
COL4A6	ITGB3	COL4A5	12.6667	3038.46	1.75848	0.750709	2	0.368102	0.811267	0.450406	0.42983	0.504471	0.540621	0.467151	0.485226	0.522546	0.503886	0.494849	0.476188	0.57411
GNAO1	S1PR3	GNAZ	7	313.689	1.88057	0.850591	0	0.143416	0.919205	0.48168	0.397114	0.36126	0.591061	0.379187	0.494087	0.47616	0.485124	0.427674	0.436637	0.386075
GNAO1	GNAZ	GNG11	8.33333	578.671	1.73609	0.832506	1	0.179752	0.899661	0.444673	0.378443	0.416838	0.55842	0.39764	0.468431	0.487629	0.47803	0.442635	0.433036	0.464355
GNAO1	ADCY9	GNAZ	11	444.417	1.63948	0.819385	1	0.223235	0.885483	0.419927	0.370754	0.398279	0.536316	0.384517	0.453535	0.467297	0.460416	0.425907	0.419026	0.465495
CNN1	MYH11	ACTG2	14.6667	1070.99	3.9042	0.835047	0	0.318673	0.902408	1	0.829668	0.75	0.975602	0.789834	0.902635	0.862801	0.882718	0.826318	0.846235	0.55527
TGFB1I1	TNS1	VCL	16	3377.57	1.77765	0.838652	0	0.444734	0.906304	0.455319	0.452672	0.341489	0.568065	0.397081	0.510369	0.454777	0.482573	0.425929	0.453725	0.451589
TNS1	VCL	ACTN1	21.6667	5100.77	1.53189	0.804255	0	0.625404	0.869132	0.392371	0.450629	0.294278	0.511561	0.372454	0.481095	0.40292	0.442007	0.387687	0.426774	0.471727
TNS1	ITGB3	VCL	23	5907.36	1.55649	0.815957	0	0.685543	0.881778	0.39867	0.470389	0.299003	0.519447	0.384696	0.494918	0.409225	0.452071	0.39696	0.439807	0.491498
TNS1	ITGB3	ACTN1	19.3333	4394.17	1.67652	0.833688	0	0.55114	0.900939	0.429415	0.459847	0.322062	0.547296	0.390954	0.503571	0.434679	0.469125	0.412816	0.447263	0.470374
PPP1R14A	RHOB	PPP1R12B	7.33333	906.729	2.03021	0.799645	0	0.175651	0.86415	0.520008	0.433919	0.390006	0.606043	0.411962	0.519981	0.498025	0.509003	0.454993	0.465972	0.389952
RHOB	MYH11	MYL9	16.3333	2032.19	2.63781	0.829019	0	0.39178	0.895893	0.675634	0.604671	0.506726	0.730699	0.555698	0.667685	0.618712	0.643199	0.587205	0.611691	0.490827
RHOB	MYH11	PPP1R12B	12.6667	1577.55	2.6481	0.815898	0	0.303898	0.881714	0.67827	0.584677	0.508703	0.729131	0.54669	0.656904	0.618917	0.637911	0.582803	0.601797	0.465971
RHOB	PPP1R12B	MYL9	12.3333	1492.83	2.28978	0.822754	0	0.294002	0.889123	0.586491	0.513368	0.439868	0.662149	0.476618	0.587759	0.551008	0.569383	0.513813	0.532188	0.442404
PRNP	CAV1	CACNA1C	20.6667	11249.4	1.38319	0.836229	0	0.877104	0.903685	0.354283	0.484988	0.265712	0.491633	0.37535	0.488311	0.378673	0.433492	0.377011	0.43183	0.533768
PRNP	MAPT	TUBA1A	10.6667	5118.61	1.45618	0.844444	0	0.422484	0.912563	0.372977	0.385354	0.279733	0.507874	0.332543	0.446614	0.393803	0.420208	0.363173	0.389579	0.427006
PDLIM4	DPYSL3	JAM3	4	2136.67	1.77653	0.892494	0	0.167977	0.964489	0.455031	0.383267	0.341273	0.582395	0.36227	0.482831	0.461834	0.472333	0.412052	0.422551	0.396874
CNTNAP1	NFASC	KCNA1	7	809.944	3.0017	0.89208	0	0.165225	0.964042	0.76884	0.617936	0.57663	0.81764	0.597283	0.717788	0.697135	0.707461	0.647209	0.657535	0.474527
CNTNAP1	KCNA1	CNTN2	6.33333	776.111	3.18156	0.881501	0	0.151393	0.952609	0.814906	0.649028	0.61118	0.849332	0.630104	0.74918	0.730256	0.739718	0.68018	0.689642	0.479727
MYH11	VCL	CALD1	22.6667	4039.58	2.29819	0.825946	0	0.597285	0.892572	0.588645	0.590805	0.441484	0.664627	0.516145	0.627716	0.553056	0.590386	0.5346	0.57193	0.519626
MYH11	MYL9	CALD1	18.3333	1363.33	2.98177	0.873877	0	0.399422	0.94437	0.763735	0.672657	0.572801	0.808894	0.622729	0.740775	0.690848	0.715811	0.656788	0.681752	0.526882
MYH11	ACTG2	CALD1	16.6667	948.802	3.35085	0.853369	0	0.35034	0.922207	0.858269	0.731287	0.643702	0.874254	0.687494	0.80277	0.758978	0.780874	0.723236	0.745132	0.532704
MYH11	TAGLN	CALD1	15	1104.96	2.95197	0.874941	0	0.326339	0.94552	0.756102	0.648661	0.567076	0.803456	0.607869	0.726059	0.685266	0.705662	0.646567	0.666964	0.50699
MYH11	VCL	MYL9	24.6667	4576.82	2.50691	0.818262	0	0.657932	0.884269	0.642107	0.646064	0.48158	0.702648	0.563822	0.674356	0.592114	0.633235	0.577968	0.619089	0.546077
MYH11	VCL	ACTG2	23	4162.29	2.87599	0.797754	0	0.608851	0.862106	0.736641	0.704694	0.552481	0.768008	0.628587	0.736351	0.660244	0.698297	0.644416	0.682469	0.5519
MYH11	MYL9	ACTG2	18.6667	1486.04	3.55958	0.845686	0	0.410987	0.913904	0.911731	0.786545	0.683798	0.912274	0.735172	0.84941	0.798036	0.823723	0.766604	0.792291	0.559156
MYH11	PPP1R12B	MYL9	16.6667	1445.93	3.20079	0.853073	0	0.372188	0.921888	0.819833	0.707922	0.614875	0.845347	0.661398	0.776634	0.730111	0.753372	0.695754	0.719016	0.528477
MYH11	MYL9	TAGLN	17	1642.19	3.1607	0.867258	0	0.386986	0.937217	0.809563	0.703919	0.607173	0.841477	0.655546	0.772698	0.724325	0.748511	0.689935	0.714122	0.533442
MYH11	TAGLN	ACTG2	15.3333	1227.67	3.52978	0.846749	0	0.337904	0.915054	0.904098	0.762549	0.678073	0.906837	0.720311	0.834693	0.792455	0.813574	0.756383	0.777502	0.539264
ITGB3	JAM3	JAM2	12.6667	3793.6	1.7693	0.892139	0	0.401289	0.964106	0.453179	0.440207	0.339884	0.580911	0.390045	0.510559	0.460397	0.485478	0.425221	0.450302	0.454643
ITGB3	VCL	FERMT2	21	5856.46	1.3705	0.825532	0	0.646269	0.892125	0.351033	0.424842	0.263274	0.486306	0.344058	0.455574	0.37479	0.415182	0.359424	0.399816	0.472357
ITGB3	VCL	ACTN1	27	7624.8	1.04608	0.776418	0	0.835096	0.83905	0.267938	0.409727	0.200954	0.410716	0.30534	0.410222	0.305835	0.358028	0.305588	0.357781	0.485521
MEF2A	HDAC4	MEF2D	7.33333	2040.69	0.688632	0.787943	0	0.225487	0.851504	0.176382	0.188659	0.132287	0.345163	0.160473	0.266911	0.238725	0.252818	0.199599	0.213692	0.313343
SRF	HDAC4	MEF2D	8	1974.87	0.64887	0.75331	0	0.23494	0.814077	0.166198	0.183383	0.124648	0.328168	0.154016	0.255776	0.226408	0.241092	0.190212	0.204896	0.303804
FGF2	HGF	KIT	12	2541.46	1.63132	0.854669	3	0.333914	0.923612	0.417837	0.396856	0.563378	0.544281	0.480117	0.470568	0.553829	0.512199	0.516973	0.475343	0.668841
FGF2	FGFR1	KL	9.66667	2242.65	1.53601	0.864125	2	0.277573	0.933832	0.393425	0.364462	0.461735	0.528527	0.413099	0.446494	0.495131	0.470813	0.454115	0.429796	0.567874
FGF2	FGFR1	HGF	12	2626.68	1.69746	0.875	3	0.33766	0.945583	0.434777	0.410498	0.576083	0.562479	0.49329	0.486488	0.569281	0.527885	0.531286	0.489889	0.679505
CAV1	CACNA1C	KCNMA1	19	9374.63	2.13131	0.862293	0	0.763849	0.931852	0.545902	0.600389	0.409427	0.64239	0.504908	0.621389	0.525908	0.573649	0.515408	0.563149	0.560401
HSPA2	CACNA1C	CACNA1H	14	4204.46	1.91318	0.817139	0	0.444037	0.883056	0.490032	0.478534	0.367524	0.588288	0.423029	0.533411	0.477906	0.505658	0.450468	0.47822	0.454281
VCL	ACTG2	CALD1	20.6667	3540.33	2.30894	0.812293	0	0.538307	0.877818	0.5914	0.578127	0.44355	0.663005	0.510838	0.620566	0.553277	0.586921	0.532058	0.565702	0.501881
VCL	MYL9	CALD1	22.3333	3954.85	1.93986	0.832801	0	0.587389	0.899981	0.496866	0.519497	0.372649	0.597645	0.446073	0.558571	0.485147	0.521859	0.46561	0.502322	0.496059
VCL	MYL9	ACTG2	22.6667	4077.56	2.51767	0.80461	0	0.598954	0.869515	0.644862	0.633385	0.483646	0.701025	0.558516	0.667205	0.592336	0.62977	0.575426	0.61286	0.528333
VCL	MYL9	SORBS1	20	5784.29	2.13985	0.813889	0	0.624579	0.879543	0.548089	0.567211	0.411067	0.630952	0.489139	0.599082	0.52101	0.560046	0.505074	0.544111	0.513053
VCL	ACTN1	CTNNA3	19	5049.87	1.87735	0.786584	1	0.573784	0.850035	0.480853	0.504086	0.443973	0.573149	0.47403	0.538617	0.508561	0.523589	0.491295	0.506323	0.559501
RGMB	CHRDL1	BMPR1A	4.33333	379.373	1.70041	0.824586	0	0.0969197	0.891103	0.435535	0.350881	0.326651	0.549427	0.338766	0.450154	0.438039	0.444096	0.388402	0.39446	0.355889
KCNA1	LGI1	CNTN2	5.66667	548.887	3.47735	0.85854	0	0.129061	0.927796	0.890669	0.700267	0.668002	0.899951	0.684134	0.800109	0.783976	0.792043	0.734055	0.742122	0.486881
HSPB7	SMPX	MYOZ2	6.33333	462.632	2.6322	0.809368	0	0.137616	0.874657	0.674198	0.540053	0.505649	0.724313	0.522851	0.632183	0.614981	0.623582	0.568916	0.577517	0.421618
MYL9	ACTG2	CALD1	16.3333	864.075	2.99253	0.860225	0	0.340444	0.929616	0.76649	0.659978	0.574867	0.807271	0.617423	0.733625	0.691069	0.712347	0.654246	0.675524	0.509137
MYL9	TAGLN	CALD1	14.6667	1020.23	2.59365	0.881797	0	0.316442	0.952928	0.664322	0.577352	0.498242	0.736474	0.537797	0.656913	0.617358	0.637135	0.577577	0.597355	0.483423
MYL9	TAGLN	ACTG2	15	1142.94	3.17145	0.853605	0	0.328008	0.922463	0.812318	0.691241	0.609239	0.839854	0.65024	0.765547	0.724546	0.745047	0.687393	0.707893	0.515697
CACNA1C	NOS1	CACNA1H	15	4711.65	2.2991	0.829255	0	0.484846	0.896149	0.58888	0.562871	0.44166	0.665697	0.502265	0.614284	0.553678	0.583981	0.527972	0.558275	0.492469
CACNA1C	CACNA1H	KCNMA1	13.6667	3880.13	2.54279	0.856147	0	0.423611	0.925209	0.651296	0.594375	0.488472	0.719774	0.541423	0.657075	0.604123	0.630599	0.572773	0.599249	0.500029
CACNA1C	KCNMB1	KCNMA1	11.6667	3759.32	2.73973	0.859574	0	0.381264	0.928914	0.701739	0.62162	0.526304	0.758532	0.573962	0.690076	0.642418	0.666247	0.60819	0.632019	0.502979
TAGLN	ACTG2	CALD1	13	605.708	2.96273	0.861288	0	0.26736	0.930766	0.758856	0.635982	0.569142	0.801834	0.602562	0.718908	0.685488	0.702198	0.644025	0.660735	0.489246

## Sheet: Supplementary Table S5
The results of Cox regression analysis for the 39 top motifs in both TCGA and ACRG cohorts
Node1	Node2	Node3	Node1 HR_TCGA	Node1 confidence interval_TCGA	Node1 Cox regression p-value_TCGA	Node2 HR_TCGA	Node2 confidence interval_TCGA	Node2 Cox regression p-value_TCGA	Node3 HR_TCGA	Node3 confidence interval_TCGA	Node3 Cox regression p-value_TCGA	Motif HR_TCGA	Motif confidence interval_TCGA	Motif Cox regression p-value_TCGA	Motif sample size.low expression group_TCGA	Motif sample size.high expression group_TCGA	Total motif sample size_TCGA	Node1 HR_ACRG	Node1 confidence interval_ACRG	Node1 Cox regression p-value_ACRG	Node2 HR_ACRG	Node2 confidence interval_ACRG	Node2 Cox regression p-value_ACRG	Node3 HR_ACRG	Node3 confidence interval_ACRG	Node3 Cox regression p-value_ACRG	Motif HR_ACRG	Motif confidence interval_ACRG	Motif Cox regression p-value_ACRG	Motif sample size.low expression group_ACRG	Motif sample size.high expression group_ACRG	Total motif sample size_ACRG
ACTN2	LDB3	PDLIM3	1.81756	1.26, 2.62	0.00139556	1.53192	1.05, 2.23	0.0261414	1.59048	1.10, 2.29	0.0127382	2.93618	1.19, 7.25	0.0194808	25	38	63	1.03765	0.68, 1.57	0.862134	1.05645	0.71, 1.57	0.786512	1.58347	1.05, 2.38	0.0272059	1.19927	0.70, 2.06	0.509803	56	76	132
ADCY5	CAV1	CACNA1C	1.29133	0.91, 1.84	0.155339	2.16901	1.48, 3.17	6.58266e-05	1.4282	1.00, 2.05	0.052607	4.40563	2.08, 9.33	0.000107991	31	43	74	1.40795	0.93, 2.12	0.101542	2.12094	1.39, 3.24	0.000486465	1.61973	1.07, 2.44	0.0212368	2.39568	1.26, 4.54	0.00745851	48	65	113
CAMK2A	ADCY5	CACNA1C	0.714553	0.50, 1.02	0.0657946	1.29133	0.91, 1.84	0.155339	1.4282	1.00, 2.05	0.052607	1.23447	0.58, 2.63	0.585189	23	25	48	1.61528	1.08, 2.41	0.0188495	1.40795	0.93, 2.12	0.101542	1.61973	1.07, 2.44	0.0212368	1.85329	0.99, 3.47	0.0538431	42	54	96
CAMK2A	ACTN1	CACNA1C	0.714553	0.50, 1.02	0.0657946	1.76503	1.23, 2.54	0.00228921	1.4282	1.00, 2.05	0.052607	0.95799	0.42, 2.19	0.919166	22	18	40	1.61528	1.08, 2.41	0.0188495	1.74454	1.17, 2.61	0.00687492	1.61973	1.07, 2.44	0.0212368	2.49859	1.36, 4.58	0.00306484	47	50	97
CAMK2A	ADCY5	ADCY2	0.714553	0.50, 1.02	0.0657946	1.29133	0.91, 1.84	0.155339	1.32412	0.93, 1.89	0.122223	0.99429	0.45, 2.18	0.988597	22	24	46	1.61528	1.08, 2.41	0.0188495	1.40795	0.93, 2.12	0.101542	1.25306	0.84, 1.88	0.275177	1.71577	0.94, 3.12	0.0769431	50	59	109
CNN1	MYH11	ACTG2	1.69885	1.17, 2.46	0.00513058	1.97744	1.36, 2.87	0.000351373	1.94477	1.32, 2.86	0.000693626	2.17903	1.41, 3.36	0.000406572	94	92	186	1.21924	0.81, 1.83	0.339436	1.33541	0.90, 1.99	0.155644	1.25852	0.84, 1.88	0.260531	1.60764	1.02, 2.54	0.0422874	90	100	190
DMD	ITGA1	CAV1	1.56823	1.09, 2.26	0.0155188	1.57851	1.09, 2.28	0.0153313	2.16901	1.48, 3.17	6.58266e-05	3.13007	1.71, 5.71	0.000202497	47	60	107	1.60937	1.07, 2.43	0.0235772	1.48808	0.97, 2.27	0.0662043	2.12094	1.39, 3.24	0.000486465	3.63597	1.80, 7.33	0.000307748	47	62	109
EVC	EVC2	GLI3	1.52867	1.06, 2.19	0.0214157	1.49008	1.04, 2.13	0.0291687	1.50216	1.04, 2.16	0.0281905	2.74562	1.58, 4.78	0.000355488	55	63	118	1.66694	1.10, 2.54	0.0170964	1.43284	0.95, 2.16	0.0853941	1.62169	1.06, 2.47	0.0244084	2.03494	1.22, 3.39	0.00651149	85	75	160
FLNA	ITGB3	CAV1	1.68451	1.17, 2.43	0.00544881	1.41586	0.99, 2.02	0.0552408	2.16901	1.48, 3.17	6.58266e-05	2.0878	1.13, 3.85	0.0185648	41	50	91	1.72443	1.14, 2.62	0.0104078	1.7324	1.14, 2.64	0.0108071	2.12094	1.39, 3.24	0.000486465	2.99677	1.56, 5.75	0.000952927	56	58	114
FLNA	ITGB3	VCL	1.68451	1.17, 2.43	0.00544881	1.41586	0.99, 2.02	0.0552408	0.981032	0.68, 1.41	0.916895	2.29877	1.09, 4.87	0.0297851	22	33	55	1.72443	1.14, 2.62	0.0104078	1.7324	1.14, 2.64	0.0108071	1.90964	1.25, 2.92	0.00281944	2.4385	1.24, 4.79	0.00976471	51	55	106
GUCY1A1	GUCY1B1	PDE3A	1.43569	1.00, 2.07	0.0516628	1.49415	1.04, 2.15	0.0296687	2.0968	1.46, 3.01	6.38623e-05	1.9045	1.21, 3.01	0.00569586	68	83	151	1.52807	1.02, 2.30	0.0417822	1.58692	1.06, 2.39	0.0263453	1.35595	0.90, 2.04	0.143794	1.71577	1.04, 2.83	0.0342201	75	84	159
GUCY1A1	GUCY1B1	PRKG1	1.43569	1.00, 2.07	0.0516628	1.49415	1.04, 2.15	0.0296687	1.42343	0.99, 2.04	0.0550356	1.76044	1.09, 2.83	0.0196827	70	80	150	1.52807	1.02, 2.30	0.0417822	1.58692	1.06, 2.39	0.0263453	1.55589	1.03, 2.34	0.0345249	1.85201	1.14, 3.00	0.0124059	77	84	161
IGF1	FGF7	FGFR1	1.41726	0.97, 2.07	0.069608	1.55993	1.08, 2.26	0.0180423	1.93048	1.33, 2.80	0.000507984	2.47039	1.43, 4.27	0.00120032	53	75	128	1.41606	0.94, 2.12	0.0928666	1.83665	1.20, 2.80	0.00477117	1.85268	1.21, 2.84	0.00461137	2.13281	1.21, 3.76	0.008776	69	73	142
IGF1	FGF10	FGFR1	1.41726	0.97, 2.07	0.069608	1.34732	0.95, 1.91	0.0949044	1.93048	1.33, 2.80	0.000507984	2.98396	1.51, 5.90	0.00169332	37	52	89	1.41606	0.94, 2.12	0.0928666	1.47942	0.98, 2.23	0.0627948	1.85268	1.21, 2.84	0.00461137	1.92637	1.11, 3.34	0.0196542	69	70	139
IGF1	FGF10	HGF	1.41726	0.97, 2.07	0.069608	1.34732	0.95, 1.91	0.0949044	1.29855	0.89, 1.89	0.170482	1.76753	0.99, 3.15	0.0538477	48	52	100	1.41606	0.94, 2.12	0.0928666	1.47942	0.98, 2.23	0.0627948	1.82681	1.19, 2.79	0.00541011	2.22339	1.22, 4.06	0.0091931	63	66	129
IGF1	FGF10	KIT	1.41726	0.97, 2.07	0.069608	1.34732	0.95, 1.91	0.0949044	1.29972	0.90, 1.89	0.168182	1.55864	0.91, 2.66	0.104458	51	55	106	1.41606	0.94, 2.12	0.0928666	1.47942	0.98, 2.23	0.0627948	1.64061	1.09, 2.48	0.0186823	1.62179	0.91, 2.90	0.102393	61	60	121
IGF1	FGF2	FGFR1	1.41726	0.97, 2.07	0.069608	1.4039	0.97, 2.02	0.0691527	1.93048	1.33, 2.80	0.000507984	2.30349	1.33, 4.00	0.00299675	49	70	119	1.41606	0.94, 2.12	0.0928666	1.13084	0.75, 1.70	0.556097	1.85268	1.21, 2.84	0.00461137	1.74058	1.00, 3.03	0.0507039	66	73	139
IGF1	FGF2	KIT	1.41726	0.97, 2.07	0.069608	1.4039	0.97, 2.02	0.0691527	1.29972	0.90, 1.89	0.168182	1.37672	0.81, 2.33	0.232808	57	70	127	1.41606	0.94, 2.12	0.0928666	1.13084	0.75, 1.70	0.556097	1.64061	1.09, 2.48	0.0186823	1.3885	0.77, 2.50	0.272733	61	64	125
IGF1	FGF2	HGF	1.41726	0.97, 2.07	0.069608	1.4039	0.97, 2.02	0.0691527	1.29855	0.89, 1.89	0.170482	1.66256	0.99, 2.80	0.0561216	61	72	133	1.41606	0.94, 2.12	0.0928666	1.13084	0.75, 1.70	0.556097	1.82681	1.19, 2.79	0.00541011	1.87416	1.05, 3.34	0.0329388	63	67	130
IGF1	FGF7	KIT	1.41726	0.97, 2.07	0.069608	1.55993	1.08, 2.26	0.0180423	1.29972	0.90, 1.89	0.168182	1.48927	0.90, 2.46	0.12049	61	75	136	1.41606	0.94, 2.12	0.0928666	1.83665	1.20, 2.80	0.00477117	1.64061	1.09, 2.48	0.0186823	1.69097	0.93, 3.09	0.0878496	57	67	124
ITGA1	ITGB3	CAV1	1.57851	1.09, 2.28	0.0153313	1.41586	0.99, 2.02	0.0552408	2.16901	1.48, 3.17	6.58266e-05	2.07858	1.20, 3.59	0.00869052	49	58	107	1.48808	0.97, 2.27	0.0662043	1.7324	1.14, 2.64	0.0108071	2.12094	1.39, 3.24	0.000486465	4.16456	2.08, 8.33	5.52e-05	53	59	112
ITGA9	JAM3	JAM2	1.69755	1.17, 2.46	0.00522235	1.86033	1.27, 2.73	0.0015157	1.29754	0.90, 1.88	0.168214	2.13046	1.28, 3.54	0.00342508	69	79	148	1.6816	1.13, 2.51	0.0112545	2.13589	1.38, 3.32	0.000719217	1.90224	1.26, 2.86	0.0020346	2.10136	1.26, 3.49	0.00414089	77	75	152
ITGB3	VCL	ACTN1	1.41586	0.99, 2.02	0.0552408	0.981032	0.68, 1.41	0.916895	1.76503	1.23, 2.54	0.00228921	1.66886	0.74, 3.78	0.220246	20	32	52	1.7324	1.14, 2.64	0.0108071	1.90964	1.25, 2.92	0.00281944	1.74454	1.17, 2.61	0.00687492	2.45012	1.20, 4.99	0.0135957	40	48	88
KCNA1	LGI1	CNTN2	1.20945	0.85, 1.73	0.298536	1.0792	0.76, 1.54	0.672418	0.958383	0.67, 1.37	0.817121	1.11278	0.52, 2.37	0.781896	17	34	51	1.24951	0.84, 1.85	0.268181	1.19194	0.78, 1.82	0.41594	1.0952	0.73, 1.65	0.664534	1.18426	0.69, 2.04	0.542331	56	56	112
LMOD1	MYH11	ACTG2	1.57204	1.09, 2.27	0.0163724	1.97744	1.36, 2.87	0.000351373	1.94477	1.32, 2.86	0.000693626	2.10515	1.32, 3.35	0.00166256	80	91	171	1.46058	0.97, 2.20	0.0684478	1.33541	0.90, 1.99	0.155644	1.25852	0.84, 1.88	0.260531	1.53427	0.97, 2.42	0.0648268	90	100	190
LMOD1	CNN1	ACTG2	1.57204	1.09, 2.27	0.0163724	1.69885	1.17, 2.46	0.00513058	1.94477	1.32, 2.86	0.000693626	1.91981	1.23, 3.00	0.00405095	82	92	174	1.46058	0.97, 2.20	0.0684478	1.21924	0.81, 1.83	0.339436	1.25852	0.84, 1.88	0.260531	1.59941	1.01, 2.53	0.0443216	89	100	189
LMOD1	CNN1	MYH11	1.57204	1.09, 2.27	0.0163724	1.69885	1.17, 2.46	0.00513058	1.97744	1.36, 2.87	0.000351373	1.87154	1.20, 2.92	0.00571252	79	92	171	1.46058	0.97, 2.20	0.0684478	1.21924	0.81, 1.83	0.339436	1.33541	0.90, 1.99	0.155644	1.43042	0.92, 2.23	0.112768	93	104	197
MYH11	MYL9	ACTG2	1.97744	1.36, 2.87	0.000351373	2.16555	1.49, 3.15	5.44149e-05	1.94477	1.32, 2.86	0.000693626	3.31764	2.01, 5.47	2.70163e-06	73	78	151	1.33541	0.90, 1.99	0.155644	1.66395	1.10, 2.52	0.0162895	1.25852	0.84, 1.88	0.260531	2.10604	1.26, 3.52	0.00451335	79	87	166
MYH11	TAGLN	ACTG2	1.97744	1.36, 2.87	0.000351373	2.00213	1.37, 2.93	0.000367306	1.94477	1.32, 2.86	0.000693626	2.52015	1.56, 4.07	0.0001585	77	85	162	1.33541	0.90, 1.99	0.155644	1.35534	0.89, 2.05	0.152008	1.25852	0.84, 1.88	0.260531	1.74098	1.05, 2.87	0.0302354	80	91	171
MYLK	MYH11	ACTG2	1.91345	1.32, 2.77	0.000586011	1.97744	1.36, 2.87	0.000351373	1.94477	1.32, 2.86	0.000693626	2.69147	1.68, 4.32	4.24527e-05	80	86	166	1.35685	0.90, 2.05	0.146212	1.33541	0.90, 1.99	0.155644	1.25852	0.84, 1.88	0.260531	1.55242	0.96, 2.50	0.07107	83	94	177
MYOCD	CNN1	MYH11	1.66551	1.15, 2.41	0.00695987	1.69885	1.17, 2.46	0.00513058	1.97744	1.36, 2.87	0.000351373	2.0019	1.26, 3.17	0.00307679	79	86	165	1.24274	0.83, 1.86	0.291218	1.21924	0.81, 1.83	0.339436	1.33541	0.90, 1.99	0.155644	1.48715	0.93, 2.37	0.0956345	83	93	176
OGN	OMD	PRELP	1.17447	0.81, 1.69	0.38863	1.13271	0.80, 1.61	0.486692	1.45077	1.00, 2.10	0.0495052	1.48004	0.93, 2.35	0.0951946	69	80	149	1.55375	1.03, 2.35	0.0369418	1.6253	1.09, 2.43	0.0182121	1.53175	1.00, 2.33	0.0473655	2.05176	1.24, 3.40	0.00529704	86	82	168
OGN	ST3GAL3	OMD	1.17447	0.81, 1.69	0.38863	1.45254	1.00, 2.11	0.0512862	1.13271	0.80, 1.61	0.486692	1.7246	0.96, 3.10	0.0688479	40	52	92	1.55375	1.03, 2.35	0.0369418	1.55281	1.02, 2.35	0.0383577	1.6253	1.09, 2.43	0.0182121	1.61411	0.95, 2.75	0.078519	67	73	140
OGN	ST3GAL3	PRELP	1.17447	0.81, 1.69	0.38863	1.45254	1.00, 2.11	0.0512862	1.45077	1.00, 2.10	0.0495052	2.08917	1.14, 3.83	0.0169832	41	51	92	1.55375	1.03, 2.35	0.0369418	1.55281	1.02, 2.35	0.0383577	1.53175	1.00, 2.33	0.0473655	1.79702	1.03, 3.12	0.0373877	70	68	138
PDE1A	GUCY1A1	GUCY1B1	1.62735	1.11, 2.38	0.0125249	1.43569	1.00, 2.07	0.0516628	1.49415	1.04, 2.15	0.0296687	1.76137	1.10, 2.82	0.0181412	71	85	156	1.8451	1.20, 2.84	0.00552713	1.52807	1.02, 2.30	0.0417822	1.58692	1.06, 2.39	0.0263453	1.98059	1.18, 3.32	0.00941079	79	89	168
PDE2A	GUCY1A1	GUCY1B1	1.96157	1.33, 2.89	0.000620363	1.43569	1.00, 2.07	0.0516628	1.49415	1.04, 2.15	0.0296687	2.2296	1.31, 3.78	0.00297628	59	73	132	1.96797	1.30, 2.99	0.00147482	1.52807	1.02, 2.30	0.0417822	1.58692	1.06, 2.39	0.0263453	2.25445	1.31, 3.88	0.00330593	69	74	143
PRNP	CAV1	CACNA1C	1.68045	1.18, 2.40	0.00410808	2.16901	1.48, 3.17	6.58266e-05	1.4282	1.00, 2.05	0.052607	4.00637	2.06, 7.79	4.24089e-05	38	49	87	1.45023	0.96, 2.18	0.0749458	2.12094	1.39, 3.24	0.000486465	1.61973	1.07, 2.44	0.0212368	2.9716	1.46, 6.06	0.00274052	41	57	98
SNAP25	CAV1	CACNA1C	1.7465	1.19, 2.57	0.00454243	2.16901	1.48, 3.17	6.58266e-05	1.4282	1.00, 2.05	0.052607	3.29006	1.65, 6.57	0.000733113	39	52	91	1.61341	1.07, 2.43	0.0222694	2.12094	1.39, 3.24	0.000486465	1.61973	1.07, 2.44	0.0212368	3.01352	1.57, 5.77	0.000869087	48	61	109
TPM2	MYH11	ACTG2	1.93518	1.32, 2.83	0.000667772	1.97744	1.36, 2.87	0.000351373	1.94477	1.32, 2.86	0.000693626	2.90134	1.69, 4.98	0.000114371	67	70	137	1.44588	0.96, 2.17	0.0752742	1.33541	0.90, 1.99	0.155644	1.25852	0.84, 1.88	0.260531	1.64787	0.96, 2.82	0.0687692	63	81	144

## Sheet: Supplementary Table S6
The performance of the logistic regression models for the 39 top motifs
Node1	Node2	Node3	TCGA-EMT vs other subtypes							TCGA-normal vs tumor			GSE184336-normal vs tumor
			p-value	AUROC in the training set	AUPRC in the training set	AUROC in the validation set (ACRG)	AUPRC in the validation set (ACRG)	AUROC in the independent set (GSE15459)	AUPRC in the independent set (GSE15459)	p-value	AUROC in the training set	AUPRC in the training set	p-value	AUROC in the training set	AUPRC in the training set	AUROC in the validation set (30% of the samples)	AUPRC in the validation set (30% of the samples)
ACTN2	LDB3	PDLIM3	1.23854e-21	0.926773	0.871544	0.947861	0.802601	0.934011	0.921488	7.4961e-09	0.849684	0.98407	1.16333e-12	0.739506	0.760524	0.708826	0.777755
ADCY5	CAV1	CACNA1C	1.28307e-17	0.893085	0.81585	0.93894	0.849007	0.891566	0.888431	2.78191e-14	0.904219	0.990193	3.71945e-09	0.695841	0.723271	0.803843	0.838688
CAMK2A	ADCY5	CACNA1C	7.89796e-18	0.894504	0.817734	0.765113	0.60856	0.725102	0.730525	2.46632e-11	0.858017	0.983998	8.64043e-15	0.752436	0.760362	0.806588	0.846783
CAMK2A	ACTN1	CACNA1C	8.12675e-16	0.888475	0.787071	0.864282	0.720616	0.813971	0.809266	2.92347e-05	0.745042	0.962835	4.86603e-21	0.801819	0.80913	0.811233	0.849092
CAMK2A	ADCY5	ADCY2	6.86665e-18	0.887057	0.823577	0.777066	0.617971	0.732397	0.715089	4.68219e-07	0.792194	0.976841	0.000401659	0.645653	0.669893	0.565878	0.665193
CNN1	MYH11	ACTG2	8.56825e-17	0.888652	0.795528	0.910792	0.817079	0.835636	0.805961	5.64373e-09	0.819831	0.979565	4.94432e-09	0.701711	0.689616	0.701014	0.714483
DMD	ITGA1	CAV1	8.26355e-17	0.882979	0.802833	0.928633	0.81407	0.899304	0.902729	9.27884e-18	0.93154	0.99336	1.95197e-28	0.835162	0.834636	0.822002	0.866072
EVC	EVC2	GLI3	4.92477e-24	0.94273	0.899931	0.97419	0.885934	0.919863	0.921396	6.07473e-05	0.734283	0.961523	2.61057e-05	0.658238	0.612505	0.566934	0.605016
FLNA	ITGB3	CAV1	3.49736e-17	0.896631	0.766402	0.914516	0.796544	0.92539	0.909998	3.30862e-09	0.828481	0.978974	7.00446e-07	0.690699	0.664271	0.727618	0.77434
FLNA	ITGB3	VCL	2.22681e-16	0.888298	0.748796	0.921445	0.756205	0.919863	0.897613	1.81976e-07	0.767511	0.966298	1.2819e-06	0.686555	0.657467	0.735431	0.785196
GUCY1A1	GUCY1B1	PDE3A	6.4975e-22	0.927305	0.867515	0.966742	0.890186	0.944401	0.933266	0.00302365	0.66519	0.939066	3.30353e-10	0.717865	0.717324	0.7481	0.778244
GUCY1A1	GUCY1B1	PRKG1	6.83027e-22	0.92695	0.865505	0.964836	0.882852	0.943849	0.931582	9.30901e-08	0.807384	0.977677	6.46328e-13	0.741117	0.758805	0.782939	0.834887
IGF1	FGF7	FGFR1	2.03634e-23	0.937766	0.891334	0.966742	0.898141	0.925942	0.927037	0.00669953	0.655063	0.950482	1.94522e-20	0.791305	0.821396	0.776605	0.860131
IGF1	FGF10	FGFR1	2.78557e-23	0.941312	0.892231	0.96501	0.873195	0.932353	0.9287	1.79395e-05	0.75211	0.961607	6.75142e-18	0.773425	0.804314	0.736486	0.834973
IGF1	FGF10	HGF	1.16884e-21	0.92766	0.87464	0.914516	0.772786	0.911131	0.908803	1.56244e-08	0.821203	0.976336	5.68332e-22	0.813061	0.811281	0.816512	0.868783
IGF1	FGF10	KIT	2.0643e-22	0.930851	0.886773	0.918327	0.771834	0.903946	0.904244	1.27929e-14	0.889451	0.987123	1.4968e-36	0.88723	0.854536	0.86402	0.888781
IGF1	FGF2	FGFR1	4.65643e-22	0.931915	0.867499	0.969253	0.885747	0.934564	0.934428	1.57924e-06	0.76192	0.970819	5.97613e-25	0.828064	0.828923	0.776394	0.826165
IGF1	FGF2	KIT	6.19247e-21	0.909574	0.856089	0.943963	0.846891	0.899967	0.901653	1.14592e-14	0.893143	0.987699	1.07709e-36	0.887998	0.864899	0.868032	0.882071
IGF1	FGF2	HGF	2.88539e-20	0.911348	0.852074	0.942231	0.842259	0.907152	0.90571	7.00755e-09	0.830591	0.980469	9.7424e-28	0.842875	0.843597	0.830025	0.886149
IGF1	FGF7	KIT	7.36396e-22	0.92305	0.868368	0.936775	0.824594	0.901735	0.899925	2.05143e-13	0.894726	0.988331	1.08539e-36	0.887959	0.858026	0.868032	0.895714
ITGA1	ITGB3	CAV1	7.39623e-16	0.875532	0.785137	0.906028	0.781149	0.904499	0.902231	6.91866e-09	0.876266	0.98659	3.08274e-07	0.699486	0.664201	0.756757	0.787965
ITGA9	JAM3	JAM2	4.72896e-25	0.944149	0.907385	0.969253	0.896797	0.934896	0.929865	1.97331e-17	0.912447	0.990203	1.936e-06	0.66338	0.671334	0.614231	0.705468
ITGB3	VCL	ACTN1	2.30588e-11	0.815071	0.712381	0.880565	0.726612	0.868023	0.864012	0.0877526	0.61308	0.937298	1.47395e-09	0.711803	0.686389	0.703125	0.747319
KCNA1	LGI1	CNTN2	1.15723e-20	0.914362	0.859416	0.783042	0.670825	0.586714	0.483292	6.05013e-17	0.928903	0.992997	2.4537e-24	0.830174	0.835343	0.826225	0.846164
LMOD1	MYH11	ACTG2	2.40237e-17	0.89734	0.805042	0.877447	0.698991	0.880292	0.877442	4.40655e-10	0.843776	0.983253	1.52164e-06	0.681759	0.689574	0.707137	0.73859
LMOD1	CNN1	ACTG2	6.50715e-18	0.898759	0.811547	0.911744	0.795804	0.87576	0.871176	3.97403e-10	0.844304	0.98338	9.88666e-08	0.689356	0.667808	0.676943	0.73191
LMOD1	CNN1	MYH11	1.83728e-16	0.886879	0.798563	0.875888	0.677884	0.88615	0.879397	2.61779e-10	0.849895	0.984187	1.20121e-09	0.707467	0.689209	0.705448	0.730013
MYH11	MYL9	ACTG2	5.25778e-18	0.904255	0.819602	0.936601	0.854907	0.915773	0.896806	1.55164e-09	0.814135	0.978271	2.6658e-12	0.750902	0.714507	0.754012	0.73763
MYH11	TAGLN	ACTG2	1.39729e-19	0.915248	0.848456	0.934523	0.845149	0.918315	0.892456	6.23546e-09	0.822152	0.979548	5.24896e-19	0.787046	0.777341	0.811655	0.820247
MYLK	MYH11	ACTG2	2.54221e-19	0.908333	0.830673	0.951758	0.851554	0.912568	0.873172	6.81013e-17	0.913924	0.990357	2.45002e-24	0.820965	0.832264	0.884291	0.90345
MYOCD	CNN1	MYH11	3.07023e-14	0.846809	0.776925	0.828599	0.72211	0.844258	0.837571	1.179e-08	0.820464	0.980121	8.86704e-09	0.697529	0.678228	0.689189	0.706602
OGN	OMD	PRELP	3.09673e-24	0.935461	0.904603	0.925255	0.805574	0.913894	0.9065	4.29758e-10	0.857173	0.98346	0.0059591	0.629384	0.633486	0.691301	0.772316
OGN	ST3GAL3	OMD	1.61776e-24	0.937234	0.900534	0.919886	0.802801	0.892893	0.882189	5.55558e-10	0.848629	0.983845	0.00251377	0.61465	0.62078	0.699958	0.775159
OGN	ST3GAL3	PRELP	1.67122e-24	0.937766	0.903	0.915728	0.788181	0.883276	0.881267	8.54864e-08	0.808333	0.978614	0.179006	0.579771	0.558382	0.605785	0.664931
PDE1A	GUCY1A1	GUCY1B1	1.34929e-22	0.93617	0.880172	0.948554	0.843545	0.940754	0.939546	1.39592e-16	0.920042	0.991402	1.07494e-12	0.737012	0.731901	0.802998	0.820607
PDE2A	GUCY1A1	GUCY1B1	2.74015e-23	0.935284	0.884891	0.971679	0.891961	0.946502	0.940069	1.12486e-21	0.950422	0.995183	6.62852e-16	0.771775	0.788083	0.853885	0.892969
PRNP	CAV1	CACNA1C	9.52091e-18	0.900177	0.811292	0.95375	0.862099	0.914447	0.918933	8.54986e-08	0.814768	0.97812	0.000201468	0.633566	0.647492	0.690456	0.742457
SNAP25	CAV1	CACNA1C	3.69944e-16	0.877482	0.778321	0.960679	0.876438	0.904499	0.901206	5.90083e-09	0.812764	0.976513	2.11321e-11	0.740081	0.731641	0.831503	0.840464
TPM2	MYH11	ACTG2	1.63616e-14	0.864007	0.764587	0.881604	0.775994	0.881176	0.871277	3.85409e-09	0.829114	0.981102	1.10162e-08	0.704205	0.678253	0.720439	0.725393

## Sheet: Supplementary Table S7
Complete miRNA-mRNA network interactions
Node1	Interaction	Node2
GUCY1A1	(pp)	PDE2A
IGF1	(pp)	ITGB3
PDLIM3	(pp)	ACTN2
GUCY1B1	(pp)	GUCY1A1
HGF	(pp)	FGF10
CNTN2	(pp)	LGI1
MYH11	(pp)	TAGLN
ACTG2	(pp)	TAGLN
TPM2	(pp)	ACTG2
CAV1	(pp)	ADCY5
CAV1	(pp)	ITGB3
MYH11	(pp)	MYOCD
ADCY2	(pp)	PDE1A
FGF2	(pp)	KIT
VCL	(pp)	LDB3
JAM2	(pp)	ITGB3
VCL	(pp)	TPM2
TPM2	(pp)	MYH11
LMOD1	(pp)	MYH11
MYLK	(pp)	MYH11
MYLK	(pp)	LMOD1
VCL	(pp)	ACTN1
FGF10	(pp)	IGF1
MYL9	(pp)	TAGLN
CACNA1C	(pp)	PRKG1
ADCY2	(pp)	PDE3A
GUCY1A1	(pp)	PDE3A
LGI1	(pp)	KCNA1
VCL	(pp)	ITGB3
VCL	(pp)	DMD
OGN	(pp)	OMD
ITGA1	(pp)	MYLK
GUCY1B1	(pp)	PDE2A
FGF2	(pp)	IGF1
JAM3	(pp)	ITGB3
LDB3	(pp)	ACTN2
VCL	(pp)	ACTN2
MYL9	(pp)	ACTG2
FLNA	(pp)	PRNP
MYOCD	(pp)	TAGLN
ACTN1	(pp)	CAMK2A
GUCY1B1	(pp)	PDE1A
ITGA1	(pp)	JAM3
FLNA	(pp)	CAMK2A
ITGA1	(pp)	ACTN2
SNAP25	(pp)	CAV1
CNN1	(pp)	LMOD1
MYL9	(pp)	TPM2
LMOD1	(pp)	TPM2
CACNA1C	(pp)	ACTN1
PDE1A	(pp)	ADCY5
FGF2	(pp)	ITGB3
CAMK2A	(pp)	ACTN2
ITGA1	(pp)	ITGB3
CAV1	(pp)	PRNP
PDE3A	(pp)	ADCY5
FGF7	(pp)	KIT
GUCY1B1	(pp)	PRKG1
HGF	(pp)	IGF1
FGF10	(pp)	FGFR1
ITGA9	(pp)	JAM3
DMD	(pp)	TPM2
CAV1	(pp)	DMD
CAMK2A	(pp)	ADCY5
PDE2A	(pp)	ADCY2
MYL9	(pp)	LMOD1
CACNA1C	(pp)	ADCY5
CNN1	(pp)	MYH11
VCL	(pp)	ACTG2
MYH11	(pp)	ACTG2
VCL	(pp)	ITGA1
CACNA1C	(pp)	PRNP
ITGA9	(pp)	ITGB3
MYLK	(pp)	ACTG2
VCL	(pp)	MYLK
GUCY1A1	(pp)	PDE1A
CNN1	(pp)	MYOCD
HGF	(pp)	FGFR1
GUCY1A1	(pp)	PRKG1
VCL	(pp)	MYL9
EVC2	(pp)	GLI3
DMD	(pp)	ACTN2
MYL9	(pp)	MYLK
ITGA1	(pp)	CAV1
FLNA	(pp)	ITGB3
OGN	(pp)	ST3GAL3
CNTN2	(pp)	KCNA1
HGF	(pp)	KIT
CAV1	(pp)	FGFR1
ADCY2	(pp)	ADCY5
PDE2A	(pp)	ADCY5
TPM2	(pp)	ACTN2
CNN1	(pp)	ACTG2
HGF	(pp)	FGF7
CACNA1C	(pp)	CAV1
OGN	(pp)	PRELP
PDLIM3	(pp)	LDB3
ACTN1	(pp)	ACTN2
ITGA1	(pp)	DMD
FGF10	(pp)	KIT
KIT	(pp)	IGF1
CACNA1C	(pp)	CAMK2A
ST3GAL3	(pp)	PRELP
MYL9	(pp)	MYH11
TPM2	(pp)	TAGLN
JAM3	(pp)	JAM2
CAV1	(pp)	FLNA
PRELP	(pp)	OMD
ITGA9	(pp)	JAM2
EVC	(pp)	EVC2
ACTN1	(pp)	ITGB3
MYLK	(pp)	TPM2
ADCY2	(pp)	CAMK2A
ITGA9	(pp)	ITGA1
SNAP25	(pp)	CACNA1C
IGF1	(pp)	FGFR1
FGF7	(pp)	FGFR1
TPM2	(pp)	ACTN1
ST3GAL3	(pp)	OMD
ITGA1	(pp)	ACTN1
ACTN1	(pp)	LDB3
LMOD1	(pp)	ACTG2
VCL	(pp)	FLNA
FGF2	(pp)	FGFR1
FGF7	(pp)	IGF1
ITGA1	(pp)	JAM2
EVC	(pp)	GLI3
VCL	(pp)	MYH11
HGF	(pp)	FGF2
GUCY1B1	(pp)	PDE3A
hsa-miR-17-5p	(mp)	CAV1
hsa-miR-17-5p	(mp)	PRNP
hsa-miR-192-5p	(mp)	CAV1
hsa-miR-192-5p	(mp)	FGF2
hsa-miR-192-5p	(mp)	PDLIM3
hsa-miR-192-5p	(mp)	PRNP
hsa-miR-196a-5p	(mp)	VCL
hsa-miR-199a-5p	(mp)	CAV1
hsa-miR-203a-3p	(mp)	FGF2
hsa-miR-214-3p	(mp)	FGFR1
hsa-miR-218-5p	(mp)	ACTN1
hsa-miR-218-5p	(mp)	FLNA
hsa-miR-218-5p	(mp)	KIT
hsa-miR-218-5p	(mp)	PRKG1
hsa-miR-1-3p	(mp)	ACTN1
hsa-miR-1-3p	(mp)	FLNA
hsa-miR-1-3p	(mp)	IGF1
hsa-miR-1-3p	(mp)	ITGA1
hsa-miR-1-3p	(mp)	MYOCD
hsa-miR-1-3p	(mp)	TPM2
hsa-miR-133a-3p	(mp)	CACNA1C
hsa-miR-152-3p	(mp)	FGF2
hsa-miR-195-5p	(mp)	FGF2
hsa-miR-195-5p	(mp)	VCL
hsa-miR-200c-3p	(mp)	GLI3
hsa-miR-490-3p	(mp)	PRNP
hsa-miR-497-5p	(mp)	FGF2
hsa-miR-3619-5p	(mp)	FGFR1
hsa-let-7c-5p	(mp)	CAMK2A
hsa-let-7c-5p	(mp)	DMD
hsa-let-7c-5p	(mp)	FGFR1
hsa-let-7c-5p	(mp)	FLNA
hsa-let-7c-5p	(mp)	ITGB3
hsa-let-7c-5p	(mp)	VCL
hsa-miR-17-5p	(mp)	ITGB3
hsa-miR-17-5p	(mp)	KIT
hsa-miR-17-5p	(mp)	VCL
hsa-miR-31-5p	(mp)	DMD
hsa-miR-31-5p	(mp)	EVC
hsa-miR-31-5p	(mp)	FLNA
hsa-miR-31-5p	(mp)	PDE3A
hsa-miR-31-5p	(mp)	TAGLN
hsa-miR-31-5p	(mp)	VCL
hsa-miR-33a-5p	(mp)	GUCY1A1
hsa-miR-96-5p	(mp)	FGF2
hsa-miR-96-5p	(mp)	FLNA
hsa-miR-96-5p	(mp)	PDE3A
hsa-miR-96-5p	(mp)	VCL
hsa-miR-192-5p	(mp)	DMD
hsa-miR-192-5p	(mp)	ITGB3
hsa-miR-192-5p	(mp)	PDE2A
hsa-miR-196a-5p	(mp)	CAV1
hsa-miR-196a-5p	(mp)	FGF2
hsa-miR-196a-5p	(mp)	FLNA
hsa-miR-196a-5p	(mp)	GUCY1A1
hsa-miR-196a-5p	(mp)	JAM3
hsa-miR-199a-5p	(mp)	ACTN1
hsa-miR-199a-5p	(mp)	SNAP25
hsa-miR-129-5p	(mp)	IGF1
hsa-miR-129-5p	(mp)	ITGA9
hsa-miR-129-5p	(mp)	OMD
hsa-miR-129-5p	(mp)	PDE3A
hsa-miR-129-5p	(mp)	TAGLN
hsa-miR-139-5p	(mp)	DMD
hsa-miR-139-5p	(mp)	MYOCD
hsa-miR-139-5p	(mp)	PDE3A
hsa-miR-182-5p	(mp)	ACTG2
hsa-miR-182-5p	(mp)	FGF2
hsa-miR-182-5p	(mp)	GLI3
hsa-miR-182-5p	(mp)	GUCY1A1
hsa-miR-182-5p	(mp)	IGF1
hsa-miR-182-5p	(mp)	PDE2A
hsa-miR-182-5p	(mp)	PDE3A
hsa-miR-182-5p	(mp)	SNAP25
hsa-miR-182-5p	(mp)	ST3GAL3
hsa-miR-182-5p	(mp)	VCL
hsa-miR-183-5p	(mp)	CAV1
hsa-miR-183-5p	(mp)	DMD
hsa-miR-183-5p	(mp)	FGF2
hsa-miR-183-5p	(mp)	PDE3A
hsa-miR-199b-5p	(mp)	ACTN1
hsa-miR-199b-5p	(mp)	KIT
hsa-miR-199b-5p	(mp)	SNAP25
hsa-miR-203a-3p	(mp)	CAV1
hsa-miR-203a-3p	(mp)	FGFR1
hsa-miR-203a-3p	(mp)	FLNA
hsa-miR-203a-3p	(mp)	GLI3
hsa-miR-203a-3p	(mp)	PRNP
hsa-miR-205-5p	(mp)	FGFR1
hsa-miR-205-5p	(mp)	PDE2A
hsa-miR-210-3p	(mp)	CAV1
hsa-miR-210-3p	(mp)	FGF2
hsa-miR-210-3p	(mp)	IGF1
hsa-miR-210-3p	(mp)	KCNA1
hsa-miR-210-3p	(mp)	PRNP
hsa-miR-210-3p	(mp)	TAGLN
hsa-miR-214-3p	(mp)	CAMK2A
hsa-miR-214-3p	(mp)	FLNA
hsa-miR-214-3p	(mp)	IGF1
hsa-miR-216a-5p	(mp)	PDE3A
hsa-miR-218-5p	(mp)	CACNA1C
hsa-miR-218-5p	(mp)	FGF2
hsa-miR-218-5p	(mp)	PDE1A
hsa-miR-218-5p	(mp)	PDE3A
hsa-miR-224-5p	(mp)	ACTG2
hsa-miR-224-5p	(mp)	ACTN1
hsa-miR-224-5p	(mp)	PRKG1
hsa-miR-200b-3p	(mp)	CAV1
hsa-miR-200b-3p	(mp)	FGFR1
hsa-miR-200b-3p	(mp)	TAGLN
hsa-miR-1-3p	(mp)	CAV1
hsa-miR-1-3p	(mp)	FGF2
hsa-miR-1-3p	(mp)	GLI3
hsa-miR-1-3p	(mp)	JAM3
hsa-miR-1-3p	(mp)	MYL9
hsa-miR-1-3p	(mp)	PDE3A
hsa-miR-1-3p	(mp)	PRNP
hsa-miR-1-3p	(mp)	SNAP25
hsa-miR-1-3p	(mp)	TAGLN
hsa-miR-125b-5p	(mp)	EVC
hsa-miR-125b-5p	(mp)	FGFR1
hsa-miR-125b-5p	(mp)	FLNA
hsa-miR-125b-5p	(mp)	ITGB3
hsa-miR-125b-5p	(mp)	MYL9
hsa-miR-125b-5p	(mp)	MYLK
hsa-miR-125b-5p	(mp)	VCL
hsa-miR-133a-3p	(mp)	FGF2
hsa-miR-133a-3p	(mp)	IGF1
hsa-miR-133a-3p	(mp)	PDE1A
hsa-miR-133a-3p	(mp)	PDE2A
hsa-miR-133a-3p	(mp)	SNAP25
hsa-miR-135a-5p	(mp)	PDE1A
hsa-miR-141-3p	(mp)	FGFR1
hsa-miR-141-3p	(mp)	VCL
hsa-miR-143-3p	(mp)	FLNA
hsa-miR-143-3p	(mp)	GUCY1A1
hsa-miR-143-3p	(mp)	PDE3A
hsa-miR-145-5p	(mp)	CAV1
hsa-miR-145-5p	(mp)	FGF2
hsa-miR-145-5p	(mp)	MYH11
hsa-miR-145-5p	(mp)	MYOCD
hsa-miR-145-5p	(mp)	PDE3A
hsa-miR-145-5p	(mp)	PRNP
hsa-miR-152-3p	(mp)	DMD
hsa-miR-152-3p	(mp)	FLNA
hsa-miR-152-3p	(mp)	PRNP
hsa-miR-127-3p	(mp)	FLNA
hsa-miR-154-3p	(mp)	ACTN1
hsa-miR-154-3p	(mp)	ST3GAL3
hsa-miR-195-5p	(mp)	ACTG2
hsa-miR-195-5p	(mp)	ACTN1
hsa-miR-195-5p	(mp)	ADCY2
hsa-miR-195-5p	(mp)	FGFR1
hsa-miR-195-5p	(mp)	GLI3
hsa-miR-195-5p	(mp)	GUCY1A1
hsa-miR-195-5p	(mp)	GUCY1B1
hsa-miR-195-5p	(mp)	HGF
hsa-miR-195-5p	(mp)	MYLK
hsa-miR-195-5p	(mp)	TAGLN
hsa-miR-195-5p	(mp)	TPM2
hsa-miR-200c-3p	(mp)	FGFR1
hsa-miR-200c-3p	(mp)	FLNA
hsa-miR-200c-3p	(mp)	ITGB3
hsa-miR-200c-3p	(mp)	MYLK
hsa-miR-200a-3p	(mp)	FGFR1
hsa-miR-200a-3p	(mp)	HGF
hsa-miR-200a-3p	(mp)	VCL
hsa-miR-34c-5p	(mp)	CAV1
hsa-miR-34c-5p	(mp)	GLI3
hsa-miR-34c-5p	(mp)	ITGB3
hsa-miR-34c-5p	(mp)	VCL
hsa-miR-376c-3p	(mp)	FGF2
hsa-miR-376c-3p	(mp)	MYLK
hsa-miR-376c-3p	(mp)	PRNP
hsa-miR-370-3p	(mp)	FLNA
hsa-miR-376a-3p	(mp)	FGF2
hsa-miR-380-5p	(mp)	ACTN1
hsa-miR-380-5p	(mp)	VCL
hsa-miR-133b	(mp)	FGFR1
hsa-miR-133b	(mp)	GLI3
hsa-miR-133b	(mp)	PDE1A
hsa-miR-196b-5p	(mp)	CAV1
hsa-miR-196b-5p	(mp)	JAM3
hsa-miR-196b-5p	(mp)	VCL
hsa-miR-429	(mp)	CAV1
hsa-miR-429	(mp)	TAGLN
hsa-miR-433-3p	(mp)	PDLIM3
hsa-miR-485-5p	(mp)	EVC
hsa-miR-485-5p	(mp)	IGF1
hsa-miR-485-5p	(mp)	PRNP
hsa-miR-485-3p	(mp)	CAV1
hsa-miR-432-5p	(mp)	FLNA
hsa-miR-432-5p	(mp)	GUCY1B1
hsa-miR-432-5p	(mp)	TAGLN
hsa-miR-432-5p	(mp)	VCL
hsa-miR-494-3p	(mp)	PDE1A
hsa-miR-494-3p	(mp)	PRNP
hsa-miR-494-3p	(mp)	VCL
hsa-miR-497-5p	(mp)	HGF
hsa-miR-497-5p	(mp)	TPM2
hsa-miR-520a-5p	(mp)	ACTN1
hsa-miR-520a-3p	(mp)	FGF7
hsa-miR-520a-3p	(mp)	KIT
hsa-miR-526b-5p	(mp)	OGN
hsa-miR-518c-5p	(mp)	PDE3A
hsa-miR-493-3p	(mp)	FGFR1
hsa-miR-487b-3p	(mp)	FGF2
hsa-miR-556-5p	(mp)	CAV1
hsa-miR-556-5p	(mp)	CNTN2
hsa-miR-556-5p	(mp)	KCNA1
hsa-miR-577	(mp)	FGF2
hsa-miR-550a-3p	(mp)	GLI3
hsa-miR-550a-3p	(mp)	PDE3A
hsa-miR-615-3p	(mp)	ACTN1
hsa-miR-615-3p	(mp)	FGF2
hsa-miR-615-3p	(mp)	FLNA
hsa-miR-615-3p	(mp)	PRNP
hsa-miR-616-5p	(mp)	OMD
hsa-miR-616-5p	(mp)	VCL
hsa-miR-629-3p	(mp)	GLI3
hsa-miR-629-3p	(mp)	MYOCD
hsa-miR-33b-5p	(mp)	GUCY1A1
hsa-miR-548d-3p	(mp)	MYOCD
hsa-miR-548d-3p	(mp)	PDE3A
hsa-miR-411-5p	(mp)	FGF2
hsa-miR-20a-3p	(mp)	EVC
hsa-miR-20a-3p	(mp)	ST3GAL3
hsa-miR-20a-3p	(mp)	TPM2
hsa-miR-100-3p	(mp)	FGF2
hsa-miR-192-3p	(mp)	CACNA1C
hsa-miR-192-3p	(mp)	FGF7
hsa-miR-192-3p	(mp)	PDE3A
hsa-miR-192-3p	(mp)	SNAP25
hsa-miR-30c-2-3p	(mp)	EVC
hsa-miR-30c-2-3p	(mp)	FGF2
hsa-miR-30c-2-3p	(mp)	IGF1
hsa-miR-30c-2-3p	(mp)	ITGB3
hsa-miR-30c-2-3p	(mp)	MYH11
hsa-miR-30c-2-3p	(mp)	PRNP
hsa-miR-125b-1-3p	(mp)	ITGA9
hsa-miR-125b-1-3p	(mp)	PDE3A
hsa-miR-125b-1-3p	(mp)	PRNP
hsa-miR-141-5p	(mp)	MYOCD
hsa-miR-141-5p	(mp)	VCL
hsa-miR-125b-2-3p	(mp)	VCL
hsa-miR-136-3p	(mp)	MYLK
hsa-miR-136-3p	(mp)	PRNP
hsa-miR-146a-3p	(mp)	ADCY2
hsa-miR-195-3p	(mp)	FGF2
hsa-miR-377-5p	(mp)	IGF1
hsa-miR-377-5p	(mp)	JAM2
hsa-miR-377-5p	(mp)	VCL
hsa-miR-490-5p	(mp)	FGFR1
hsa-miR-490-5p	(mp)	MYLK
hsa-miR-532-3p	(mp)	ACTN1
hsa-miR-532-3p	(mp)	FGF2
hsa-miR-532-3p	(mp)	FGFR1
hsa-miR-455-3p	(mp)	ACTN1
hsa-miR-455-3p	(mp)	EVC
hsa-miR-455-3p	(mp)	IGF1
hsa-miR-455-3p	(mp)	JAM2
hsa-miR-455-3p	(mp)	VCL
hsa-miR-556-3p	(mp)	DMD
hsa-miR-665	(mp)	EVC
hsa-miR-665	(mp)	FGF2
hsa-miR-665	(mp)	IGF1
hsa-miR-548f-3p	(mp)	FGF2
hsa-miR-1275	(mp)	CAMK2A
hsa-miR-1275	(mp)	PRELP
hsa-miR-1292-5p	(mp)	FGF2
hsa-miR-196b-3p	(mp)	FLNA
hsa-miR-2116-5p	(mp)	PDE3A
hsa-miR-548s	(mp)	ITGA1
hsa-miR-548s	(mp)	PDLIM3
hsa-miR-3065-5p	(mp)	IGF1
hsa-miR-3065-5p	(mp)	ITGA1
hsa-miR-3194-5p	(mp)	FGFR1
hsa-miR-3662	(mp)	MYOCD
hsa-miR-3680-3p	(mp)	PDE3A
hsa-miR-3926	(mp)	ITGA1
hsa-miR-3934-5p	(mp)	HGF
hsa-miR-3619-3p	(mp)	PDE2A
hsa-miR-4684-3p	(mp)	MYLK
hsa-miR-4684-3p	(mp)	PDE3A
hsa-miR-203b-3p	(mp)	PDLIM3
hsa-miR-4713-5p	(mp)	MYOCD
hsa-miR-4766-3p	(mp)	JAM2
hsa-miR-550a-3-5p	(mp)	KIT
hsa-miR-5589-3p	(mp)	FGF2
hsa-miR-5589-3p	(mp)	ITGA1
hsa-miR-5684	(mp)	KIT
hsa-miR-584-3p	(mp)	CAV1
hsa-miR-1304-3p	(mp)	FGFR1
hsa-miR-1304-3p	(mp)	PDLIM3
hsa-miR-216a-3p	(mp)	PDE3A
hsa-miR-215-3p	(mp)	ADCY2
hsa-miR-370-5p	(mp)	PRELP
hsa-miR-887-5p	(mp)	FGF2
hsa-miR-887-5p	(mp)	IGF1
hsa-miR-887-5p	(mp)	ITGB3
hsa-miR-887-5p	(mp)	MYH11
hsa-miR-6779-5p	(mp)	IGF1
hsa-miR-6779-5p	(mp)	ITGB3
hsa-miR-6779-5p	(mp)	MYH11
hsa-miR-7156-5p	(mp)	IGF1
